# Supplementary material for: High-resolution seasonal and decadal inventory of anthropogenic gas-phase and particle emissions for Argentina
Source: Copernicus journal article supplement (doi:10.5194/essd-13-5027-2021), 2021-10-29
Supplement: Supplementary file 1 [file essd-13-5027-2021-supplement.zip]

Archive with 3 entries (3 files):
- essd-13-5027-2021-supplement-title-page.pdf
- Supplement.pdf
- comp_geaa_ceds_edgar_tcna.xlsx
