# Supplementary material for: High-resolution seasonal and decadal inventory of anthropogenic gas-phase and particle emissions for Argentina
Source: Copernicus journal article supplement (doi:10.5194/essd-13-5027-2021), 2021-10-29
Supplement: Supplementary file 1 [file essd-13-5027-2021-supplement.zip › comp_geaa_ceds_edgar_tcna.xlsx]

## Sheet: INDEX
	Supplementary material to
	High resolution seasonal and decadal inventory of anthropic gas-phase and particle emissions for Argentina
	S. Enrique Puliafito1,2, Tomás R. Bolaño-Ortiz1,2, Rafael P. Fernandez2,3,4, Lucas L. Berná1,5, Romina M. Pascual-Flores1,2, Josefina Urquiza1,2, Ana I. López-Noreña1,2,3, María F. Tames1,2
	1 Research Group for Atmospheric and Environmental Studies (GEAA), Mendoza Regional Faculty, National Technological University (FRM-UTN), Mendoza, M5500, Argentina
	2 National Scientific and Technical Research Council (CONICET), Mendoza, M5500, Argentina
	3 School of Natural Sciences, National University of Cuyo (FCEN-UNCuyo), Mendoza, M5501, Argentina
	4 Institute for Interdisciplinary Science (ICB-CONICET), Mendoza, M5501, Argentina
	Correspondence to: S. Enrique Puliafito (epuliafito@frm.utn.edu.ar)
	Comparison of total annual values for 5 inventories: GEAA, TCNA2015, TCNA2019, CEDS AND EDGAR
	For the following sectors:
		1A1a	Electricity generation an thermal power plants
		1A1bc	Fuel production at refineries (own fuel consumption)
		1A2	Manufacturing industriesown fuel consumption
		1A3	Transport. Road, domestic aviation, railroad, domestic shiping
		1A4	Residential, commercial, public offices, others
		1B1-1B2	Fugitive from solid-oil,gas production and extraction
		1A2	Manufacturing industries production
	Followig pollutants
		CO2
		CH4
		N2O
		CO
		NOX
		NMVOC
		SO2
		NH3
	Note	Not all inventories have all profiles for all considered pollutants
	Time span	1995-2015
	Page 1	SUMMARY!A1	Summary table for all species and sectors
	Page 2	VAR_CO2!A1	Summary tables for CO2 all sectors and inventories
	Page 3	CO2_1A1B!A1	Tables and Figures for CO2 all sectors and inventories
	Page 4	VAR_CH4!A1	Summary tables for CH4 all sectors and inventories
	Page 5	CH4_1A1B!A1	Tables and Figures for CH4C all sectors and inventories
	Page 6	VAR_N2O!A1	Summary tables for N2O all sectors and inventories
	Page 7	N2O_1A1B!A1	Tables and Figures for N2O all sectors and inventories
	Page 8	VAR_CO!A1	Summary tables for CO all sectors and inventories
	Page 9	CO_1A1B!A1	Tables and Figures for CO all sectors and inventories
	Page 10	VAR_NOX!A1	Summary tables for NOX all sectors and inventories
	Page 11	NOX_1A1B!A1	Tables and Figures for NOX all sectors and inventories
	Page 12	VAR_VOC!A1	Summary tables for NMVOC all sectors and inventories
	Page 13	VOC_1A1B!A1	Tables and Figures for NMVOC all sectors and inventories
	Page 14	VAR_SO2!A1	Summary tables for SO2 all sectors and inventories
	Page 15	SO2_1A1B!A1	Tables and Figures for SO2 all sectors and inventories
	Page 16	VAR_NH3!A1	Summary tables for NH3 all sectors and inventories
	Page 17	NH3_1A1B!A1	Tables and Figures for NH3 all sectors and inventories
	Page 18	CO2EQ_EDGAR!A1	Comparison of CO2 eq between GEAA and EDGAR
	Page 19	PM10_EDGAR!A1	Comparison of PM10 between GEAA and EDGAR
	Page 20	PM25_EDGAR!A1	Comparison of PM2.5 between GEAA and EDGAR

## Sheet: SUMMARY
		Energy	Energy	Energy	Energy	Energy	Energy	Energy	Energy	Energy	Energy	Energy	Energy	Energy	Energy	Energy	Energy	Energy	Energy	Energy	Energy	Energy	Energy	Energy	Energy	Energy	Energy	Energy	Energy	Energy	Energy
	1995	Thermal	Thermal	Thermal	Thermal	Thermal	transforamation	transforamation	transforamation	transforamation	transforamation	Residential	Residential	Residential	Residential	Residential	Industry	Industry	Industry	Industry	Industry	Transport	Transport	Transport	Transport	Transport	Fugitive	Fugitive	Fugitive	Fugitive	Fugitive
	2012	power plants	power plants	power plants	power plants	power plants	Refinery	Refinery	Refinery	Refinery	Refinery	RCAO	RCAO	RCAO	RCAO	RCAO	own energy	own energy	own energy	own energy	own energy	R+RR+Nav	R+RR+Nav	R+RR+Nav	R+RR+Nav	R+RR+Nav	R+RR+Nav	R+RR+Nav	R+RR+Nav	R+RR+Nav	R+RR+Nav
		1A1a	1A1a	1A1a	1A1a	1A1a	1A1bc	1A1bc	1A1bc	1A1bc	1A1bc	1A4abc	1A4abc	1A4abc	1A4abc	1A4abc	1A2	1A2	1A2	1A2	1A2	1A3bc	1A3bc	1A3bc	1A3bc	1A3bc	1B1-1B2	1B1-1B2	1B1-1B2	1B1-1B2	1B1-1B2
CONT		GEAA-TCNA2019	GEAA-TCNA2015	GEAA-CEDS	GEAA-EDGAR	GEAA-AVERAGE	GEAA-TCNA2019	GEAA-TCNA2015	GEAA-CEDS	GEAA-EDGAR	GEAA-AVERAGE	GEAA-TCNA2019	GEAA-TCNA2015	GEAA-CEDS	GEAA-EDGAR	GEAA-AVERAGE	GEAA-TCNA2019	GEAA-TCNA2015	GEAA-CEDS	GEAA-EDGAR	GEAA-AVERAGE	GEAA-TCNA2019	GEAA-TCNA2015	GEAA-CEDS	GEAA-EDGAR	GEAA-AVERAGE	GEAA-TCNA2019	GEAA-TCNA2015	GEAA-CEDS	GEAA-EDGAR	GEAA-AVERAGE
CO2	MEAN ABS DIF.	0.00999475	0.0148134	0.167664	0.238805	0.0864803	0.171601	0.0967215	0.221493	0.28841	0.149566	0.1226	0.0645384	0.139451	0.133754	0.0949091	0.189159	0.263678	0.128145	0.0888384	0.0998006	0.154495	0.10431	0.113796	0.142271	0.106984	0.192117	0.168721	0.870734	0.673017	0.280347
	DESV EST	0.01218	0.0189934	0.068501	0.0540965	0.0253412	0.16861	0.113521	0.165878	0.106469	0.10024	0.122189	0.0350734	0.0542713	0.0498986	0.0445711	0.192403	0.056419	0.10779	0.122169	0.110216	0.0680836	0.0870188	0.0420725	0.0523683	0.0367927	0.18823	0.138473	0.366361	0.531846	0.222976
CH4	MEAN ABS DIF.	0.108048	0.0727888	0.623333	0.757028	0.285414	0.102859	0.0578291	0.953638	1.13853	0.441173	0.962769	0.0644716	0.513681	0.837883	0.493485	0.854435	0.0715884	0.152236	0.224825	0.230945	0.138454	0.0539035	0.293937	0.0344039	0.0583765	0.0664159	0.0220318	1.34517	0.935349	0.457542
	DESV EST	0.159604	0.132185	0.351437	0.332204	0.132343	0.124026	0.0819331	0.229173	0.15579	0.107115	0.17621	0.0304255	0.282843	0.133866	0.0580788	0.124677	0.102563	0.154047	0.233064	0.0636798	0.0503307	0.0566708	0.271437	0.0384549	0.064568	0.0625097	0.0290279	0.16813	0.228791	0.0723215
N2O	MEAN ABS DIF.	1.66792	1.78906		1.97223	1.36855	0.0980113	0.144789		0.142565	0.0700216	0.157872	0.119603		0.14424	0.0964889	0.838894	0.0691653		0.202405	0.19375	0.376363	0.12657		0.840127	0.297936	0.168966	0.140542		0.613749	0.191386
	DESV EST	1.32296	1.0885		0.73977	0.788373	0.117253	0.194876		0.121486	0.0791653	0.184354	0.165502		0.132189	0.0986856	0.158815	0.102057		0.223617	0.0439407	0.131443	0.136349		0.108527	0.105988	0.184576	0.160168		0.252591	0.127977
NOX	MEAN ABS DIF.	0.188315	0.120985	0.0948318	0.154902	0.102383	0.158867	0.119473	0.128357	0.709502	0.104887	0.046683	0.0236046	0.156663	0.974152	0.176073	0.0392509	0.0253448	0.0416124	0.909642	0.201824	0.131253	0.12025	0.105324	0.099375	0.0762025	0.268897	0.195332	0.231786	0.815438	0.28374
	DESV EST	0.113971	0.123602	0.137118	0.0728812	0.0779864	0.14365	0.135643	0.125541	0.124881	0.0909764	0.0936781	0.0616797	0.080795	0.0850168	0.096159	0.05227	0.035159	0.0563337	0.139074	0.0468683	0.0755282	0.0865919	0.0794038	0.113707	0.0655517	0.192025	0.169126	0.232836	0.651932	0.222178
CO	MEAN ABS DIF.	0.0527727	0.0585728	0.355519	1.28015	0.323326	0.156771	0.114535	0.128456	1.6839	0.433583	0.114599	0.10061	0.213051	0.585714	0.0643515	0.103218	0.0573205	0.0600264	0.619644	0.111779	0.142788	0.18527	0.155504	0.154881	0.0709493	0.0217926	0.0197157	2.22406	2.32272	0.939678
	DESV EST	0.0453783	0.0465994	0.0815513	0.0830743	0.0424113	0.105738	0.0845736	0.0803476	0.108379	0.0665861	0.107439	0.083017	0.0895002	0.0816936	0.0857583	0.137299	0.0822323	0.0794697	0.199489	0.0608915	0.1634	0.199563	0.157144	0.138868	0.103579	0.0192653	0.020879	0.161791	0.221607	0.0211044
NMVOC	MEAN ABS DIF.	0.0824326	0.0791229	0.237905	0.224928	0.10085	0.093336	0.0682823	0.068824	0.95256	0.198808	0.0767351	0.0427614	0.0746156	0.448711	0.108922	0.0495865	0.0350624	0.0399122	2.6808	0.54391	0.170031	0.119832	0.134443	0.101156	0.0988464	0.565854	0.469388	0.229232	0.235588	0.276154
	DESV EST	0.0909733	0.114736	0.113016	0.203372	0.0869134	0.128917	0.111627	0.105074	0.35285	0.11195	0.115267	0.0737327	0.0976993	0.108108	0.0801622	0.0589833	0.032344	0.0405269	0.431179	0.0636458	0.161805	0.168475	0.155303	0.113153	0.100277	0.257135	0.274312	0.357514	0.256156	0.215696
SO2	MEAN ABS DIF.	0.295413	0.317912	0.214193	1.62681	0.230644	0.286818	0.246455	0.290348	1.86833	0.293614	0.057819	0.09463	0.340648	1.38422	0.359566	0.0417804	0.0446332	0.0376237	3.63186	0.771119	0.377149	0.298151	0.184381	0.445948	0.192609	0.126733	0.116803	0.125329	1.19043	0.193379
	DESV EST	0.0902598	0.364717	0.273628	0.35865	0.11695	0.366895	0.352787	0.356686	0.346191	0.206241	0.084893	0.122636	0.126106	0.208704	0.0849211	0.044682	0.0593777	0.04624	0.342886	0.0508005	0.156621	0.166427	0.214471	0.58966	0.189281	0.127161	0.130324	0.124188	0.160001	0.160033
NH3	MEAN ABS DIF.			0.779282	0.938146	0.580865																		1.56167	1.27646	0.638232			1.33568	1.43277	0.937648
	DESV EST			0.159212	0.186815	0.103703																		0.114833	0.224286	0.112143			0.0374823	0.107924	0.00801918
		Industry	Industry	Industry	Industry	Industry
	1995	manufacture	manufacture	manufacture	manufacture	manufacture
	2012	Production	Production	Production	Production	Production
		2A-2H	2A-2H	2A-2H	2A-2H	2A-2H
CONT		GEAA-TCNA2019	GEAA-TCNA2015	GEAA-CEDS	GEAA-EDGAR	GEAA-AVERAGE
CO2	MEAN ABS DIF.	0.0391946	0.742975	0.456598	1.54895	0.855741
	DESV EST	0.0580098	0.0769053	0.110429	0.178642	0.0165708
CH4	MEAN ABS DIF.	2.02252		0.308751	0.345322	0.818587
	DESV EST	0.689458		0.240497	0.202497	0.0215059
N2O	MEAN ABS DIF.				0.545618	0.561808
	DESV EST				0.244657	0.420731
NOX	MEAN ABS DIF.			0.738898	0.833522	0.447382
	DESV EST			0.318495	0.266892	0.365658
CO	MEAN ABS DIF.			0.414161	0.0686461	0.36487
	DESV EST			0.229298	0.0874083	0.171005
NMVOC	MEAN ABS DIF.			0.177587	1.54881	0.512757
	DESV EST			0.249224	0.227685	0.156879
SO2	MEAN ABS DIF.			1.96521	0.160927	0.530128
	DESV EST			0.840124	0.235787	0.365535

## Sheet: VAR_VOC
	Energy	Energy	Energy	Energy	Energy	Energy	Energy	Energy	Energy	Energy			Energy	Energy	Energy	Energy	Energy	Energy	Energy	Energy	Energy	Energy			Energy	Energy	Energy	Energy	Energy	Energy	Energy	Energy	Energy	Energy
VOC	Thermal	Thermal	Thermal	Thermal	Thermal	Thermal	Thermal	Thermal	Thermal	Thermal		VOC	transforamation	transforamation	transforamation	transforamation	transforamation	transforamation	transforamation	transforamation	transforamation	transforamation		VOC	Residential	Residential	Residential	Residential	Residential	Residential	Residential	Residential	Residential	Residential
t	power plants	power plants	power plants	power plants	power plants	power plants	power plants	power plants	power plants	power plants		t	Refinery	Refinery	Refinery	Refinery	Refinery	Refinery	Refinery	Refinery	Refinery	Refinery		t	RCAO	RCAO	RCAO	RCAO	RCAO	RCAO	RCAO	RCAO	RCAO	RCAO
	1A1a	1A1a	1A1a	1A1a	1A1a	1A1a	1A1a	1A1a	1A1a	1A1a			1A1bc	1A1bc	1A1bc	1A1bc	1A1bc	1A1bc	1A1bc	1A1bc	1A1bc	1A1bc			1A4abc	1A4abc	1A4abc	1A4abc	1A4abc	1A4abc	1A4abc	1A4abc	1A4abc	1A4abc
year	GEAA-TCNA2019	GEAA-TCNA2015	GEAA-CEDS	GEAA-EDGAR	AVERAGE	GEAA-TCNA2019	GEAA-TCNA2015	GEAA-CEDS	GEAA-EDGAR	GEAA-AVERAGE		year	GEAA-TCNA2019	GEAA-TCNA2015	GEAA-CEDS	GEAA-EDGAR	AVERAGE	GEAA-TCNA2019	GEAA-TCNA2015	GEAA-CEDS	GEAA-EDGAR	GEAA-AVERAGE		year	GEAA-TCNA2019	GEAA-TCNA2015	GEAA-CEDS	GEAA-EDGAR	AVERAGE	GEAA-TCNA2019	GEAA-TCNA2015	GEAA-CEDS	GEAA-EDGAR	GEAA-AVERAGE
1995	106.581	106.581	-188.3	153.442	1557.49	0.0684315	0.0684315	-0.1209	0.0985187	0.0228964		1995	17.8059	17.8059	17.8059	-1933.99	1111.63	0.0160178	0.0160178	0.0160178	-1.73977	-0.338344		1995	-1202.05	-1202.05	-2442.11	12593.1	29784.3	-0.0403583	-0.0403583	-0.0819932	0.42281	0.05202
1996	156.767	156.767	-244.514	258.632	1856.72	0.0844323	0.0844323	-0.131692	0.139296	0.0352937		1996	11.5568	11.5568	11.5568	-1797.25	1117.83	0.0103386	0.0103386	0.0103386	-1.60781	-0.315358		1996	-928.519	-928.519	-2104.62	12948	31205.4	-0.0297551	-0.0297551	-0.0674439	0.414928	0.0575949
1997	242.354	242.354	-142.248	388.389	1706.47	0.14202	0.14202	-0.0833579	0.227597	0.085656		1997	96.828	96.828	96.828	-1301.11	1237.38	0.0782527	0.0782527	0.0782527	-1.05151	-0.163349		1997	-1294.84	-1294.84	-2574.78	14028.2	29931.1	-0.0432607	-0.0432607	-0.0860237	0.468683	0.0592275
1998	173.602	173.602	-107.579	440.057	1774.21	0.0978477	0.0978477	-0.0606347	0.24803	0.0766181		1998	425.584	425.584	425.584	-1151.87	1349.24	0.315425	0.315425	0.315425	-0.853719	0.0185114		1998	-1690.8	-1690.8	-2856.15	12592.1	29964	-0.0564277	-0.0564277	-0.0953194	0.420241	0.0424132
1999	215.879	215.879	-105.849	489.97	2192.26	0.0984733	0.0984733	-0.0482832	0.223499	0.0744326		1999	-76.6667	-76.6667	-76.6667	-1690.59	1292.25	-0.059328	-0.059328	-0.059328	-1.30825	-0.297247		1999	-1559.34	-1559.34	-2675.96	10706.6	31786.4	-0.0490569	-0.0490569	-0.0841858	0.336829	0.030906
2000	-404.223	-404.223	-551.493	10.3219	2638.82	-0.153183	-0.153183	-0.208992	0.00391158	-0.10229		2000	-195.887	-195.887	-174.077	-1567.64	1223.85	-0.160058	-0.160058	-0.142238	-1.28091	-0.348653		2000	-1436.99	-1436.99	-596.085	11929.6	30616.7	-0.0469347	-0.0469347	-0.0194693	0.389643	0.0552609
2001	219.086	219.086	-490.406	-158.165	1904.83	0.115016	0.115016	-0.257453	-0.0830332	-0.022091		2001	-166.888	-166.888	-166.888	-1454.12	1249.03	-0.133614	-0.133614	-0.133614	-1.16419	-0.313007		2001	-705.077	-705.077	-1734.03	10518.8	27858.8	-0.0253089	-0.0253089	-0.0622437	0.377575	0.0529428
2002	191.136	191.136	-765.706	-450.701	1772.75	0.107819	0.107819	-0.43193	-0.254238	-0.0941061		2002	158.357	158.357	158.357	-1334.5	1359.19	0.116509	0.116509	0.116509	-0.981836	-0.126462		2002	-543.799	-543.799	-1766.34	10372.6	27251.3	-0.019955	-0.019955	-0.0648169	0.380629	0.0551803
2003	125.101	125.101	-869.706	-502.555	2040.97	0.0612952	0.0612952	-0.426125	-0.246234	-0.109954		2003	258.741	258.741	258.741	-1352.87	1429.09	0.181053	0.181053	0.181053	-0.94667	-0.0807019		2003	-379.333	-379.333	-1884.16	14037.6	32346.6	-0.0117272	-0.0117272	-0.0582492	0.433974	0.0704541
2004	146.655	146.655	-897.553	-924.868	2575.86	0.0569344	0.0569344	-0.348447	-0.359052	-0.118726		2004	99.0623	99.0623	99.0623	-856.932	1249.04	0.0793108	0.0793108	0.0793108	-0.686073	-0.089628		2004	792.799	792.799	-907.529	29501.3	43235.7	0.0183367	0.0183367	-0.0209903	0.682336	0.139604
2005	227.99	227.99	-730.306	-584.156	2703.27	0.0843384	0.0843384	-0.270156	-0.216092	-0.0635144		2005	-27.2533	-27.2533	-27.2533	-910.049	1250.7	-0.0217905	-0.0217905	-0.0217905	-0.727633	-0.158601		2005	184.337	184.337	-1305.47	24248.9	42764.4	0.00431053	0.00431053	-0.030527	0.567035	0.109026
2006	181.573	181.573	-710.97	-583.965	2829.45	0.0641725	0.0641725	-0.251275	-0.206388	-0.0658635		2006	52.9492	52.9492	52.9492	-700.384	1198.64	0.0441745	0.0441745	0.0441745	-0.584318	-0.0903588		2006	4325.49	4325.49	2716.33	12918.7	33325.1	0.129797	0.129797	0.08151	0.387657	0.145752
2007	48.2974	48.2974	-936.043	-865.095	3134.71	0.0154073	0.0154073	-0.298605	-0.275973	-0.108753		2007	-22.9033	-22.9033	-22.9033	-597.669	1242.75	-0.0184296	-0.0184296	-0.0184296	-0.480926	-0.107243		2007	7425.09	7425.09	5690.94	13427.8	31954.7	0.232363	0.232363	0.178094	0.420215	0.212607
2008	70.1177	70.1177	-877.076	-637.156	3381.26	0.0207371	0.0207371	-0.259393	-0.188437	-0.0812712		2008	-118.236	-118.236	-118.236	-866.635	1325.34	-0.0892114	-0.0892114	-0.0892114	-0.653896	-0.184306		2008	-598.092	-598.092	-2145.36	19794.4	38552.7	-0.0155136	-0.0155136	-0.0556476	0.513437	0.0853525
2009	55.4842	55.4842	-853.97	-656.119	3177.78	0.0174601	0.0174601	-0.268732	-0.206471	-0.0880566		2009	55.7597	55.7597	55.7597	-774.653	1364	0.0408795	0.0408795	0.0408795	-0.567927	-0.0890576		2009	2188.63	2188.63	662.297	20761.2	37834.6	0.0578474	0.0578474	0.0175051	0.548737	0.136387
2010	-250.613	-1121.6	-1148.56	-1196.78	3539.91	-0.0707964	-0.316843	-0.32446	-0.338082	-0.210036		2010	30.6667	30.6667	11.1935	-956.225	1375.38	0.0222969	0.0222969	0.00813852	-0.695246	-0.128503		2010	2548.2	2548.2	-1817.63	13817.9	32351	0.0787673	0.0787673	-0.0561848	0.427123	0.105695
2011	-476.962	-189.806	-1298.87	-1082.04	3701.15	-0.128869	-0.0512831	-0.350937	-0.292351	-0.164688		2011	-34.4119	-34.4119	-34.4119	-1226.07	1396.53	-0.0246411	-0.0246411	-0.0246411	-0.877945	-0.190374		2011	745.64	745.64	-662.74	9393.97	29757	0.0250577	0.0250577	-0.0222718	0.31569	0.0687067
2012	-322.052	-433.786	-1479.86	-1216.97	4096.75	-0.0786115	-0.105886	-0.361227	-0.297059	-0.168557		2012	-35.7474	-35.7474	-4.05009	-1967.33	1581.9	-0.0225978	-0.0225978	-0.00256027	-1.24365	-0.258282		2012	401.569	401.569	-2792.53	6717.85	30395.5	0.0132115	0.0132115	-0.0918731	0.221015	0.0311129
2013	-410.691		-1062.97	-1249.5	3982.73	-0.103118		-0.266893	-0.313729	-0.170935		2013	-256.898		-36.1277	-627.504	1383.77	-0.185651		-0.0261082	-0.453474	-0.166308		2013	10340.9		8615.01	21578.3	35004	0.295419		0.246115	0.616453	0.289497
2014	-253.231		-901.04	-943.225	3977.76	-0.0636617		-0.22652	-0.237125	-0.131827		2014	-474.506		-64.6244	-1844.16	1733.32	-0.273756		-0.0372837	-1.06395	-0.343747		2014	2512.27		5111.47	17444.1	34899.1	0.0719867		0.146464	0.499844	0.179574
2015	-395.457			-1077.9	4016.41	-0.0984602			-0.268374	-0.122278		2015	-122.4			-1897.04	1834.55	-0.0667194			-1.03406	-0.366927		2015	11240.7			18777.8	32483.5	0.346042			0.578073	0.308039
MEAN ABS DIF	222.564	205.24	683.953	660.477	2788.65	0.0824326	0.0791229	0.237905	0.224928	0.10085		MEAN ABS DIF	130.434	89.7764	91.0989	1276.6	1347.88	0.093336	0.0682823	0.068824	0.95256	0.198808		MEAN ABS DIF	2525.92	1378.6	2431.5	15148	33014.4	0.0767351	0.0427614	0.0746156	0.448711	0.108922
DESV EST	257.784	345.896	401.832	584.647	879.396	0.0909733	0.114736	0.113016	0.203372	0.0869134		DESV EST	185.818	148.301	140.316	460.995	180.806	0.128917	0.111627	0.105074	0.35285	0.11195		DESV EST	3800.33	2368.12	3245.23	5524.11	4361.07	0.115267	0.0737327	0.0976993	0.108108	0.0801622
	Energy	Energy	Energy	Energy	Energy	Energy	Energy	Energy	Energy	Energy			Energy	Energy	Energy	Energy	Energy	Energy	Energy	Energy	Energy	Energy			Energy	Energy	Energy	Energy	Energy	Energy	Energy	Energy	Energy	Energy
VOC	Industry	Industry	Industry	Industry	Industry	Industry	Industry	Industry	Industry	Industry		VOC	Transport	Industry	Industry	Industry	Industry	Industry	Industry	Industry	Industry	Industry		VOC	fugitve	Industry	Industry	Industry	Industry	Industry	Industry	Industry	Industry	Industry
t	own energy	own energy	own energy	own energy	own energy	own energy	own energy	own energy	own energy	own energy		t	R+RR+Nav	R+RR+Nav	R+RR+Nav	R+RR+Nav	R+RR+Nav	R+RR+Nav	R+RR+Nav	R+RR+Nav	R+RR+Nav	R+RR+Nav		t	fuels prod	R+RR+Nav	R+RR+Nav	R+RR+Nav	R+RR+Nav	R+RR+Nav	R+RR+Nav	R+RR+Nav	R+RR+Nav	R+RR+Nav
	1A2	1A2	1A2	1A2	1A2	1A2	1A2	1A2	1A2	1A2			1A3bc	1A3bc	1A3bc	1A3bc	1A3bc	1A3bc	1A3bc	1A3bc	1A3bc	1A3bc			1B1-1B2	1B1-1B2	1B1-1B2	1B1-1B2	1B1-1B2	1B1-1B2	1B1-1B2	1B1-1B2	1B1-1B2	1B1-1B2
year	GEAA-TCNA2019	GEAA-TCNA2015	GEAA-CEDS	GEAA-EDGAR	AVERAGE	GEAA-TCNA2019	GEAA-TCNA2015	GEAA-CEDS	GEAA-EDGAR	GEAA-AVERAGE		year	GEAA-TCNA2019	GEAA-TCNA2015	GEAA-CEDS	GEAA-EDGAR	AVERAGE	GEAA-TCNA2019	GEAA-TCNA2015	GEAA-CEDS	GEAA-EDGAR	GEAA-AVERAGE		year	GEAA-TCNA2019	GEAA-TCNA2015	GEAA-CEDS	GEAA-EDGAR	AVERAGE	GEAA-TCNA2019	GEAA-TCNA2015	GEAA-CEDS	GEAA-EDGAR	GEAA-AVERAGE
1995	618.952	618.952	618.952	-47109.4	15408.9	0.0401685	0.0401685	0.0401685	-3.05729	-0.587356		1995	-36250.6	-36250.6	-34871.1	-74721.9	374654	-0.0967573	-0.0967573	-0.0930754	-0.199442	-0.0972065		1995	162306	162306	8355.73	47683.8	193123	0.840426	0.840426	0.0432663	0.246909	0.394205
1996	822.032	822.032	822.032	-46165.2	15205.1	0.0540631	0.0540631	0.0540631	-3.03617	-0.574796		1996	-40209.6	-40209.6	-38390.4	-68776.7	364915	-0.110189	-0.110189	-0.105204	-0.188473	-0.102811		1996	137784	137784	-16787.8	13678.8	197966	0.695997	0.695997	-0.0848011	0.0690968	0.275258
1997	676.861	676.861	676.861	-52442.3	17171.4	0.039418	0.039418	0.039418	-3.05405	-0.58716		1997	-44686.3	-44686.3	-42937.7	-65367	346129	-0.129103	-0.129103	-0.124051	-0.188852	-0.114222		1997	139218	139218	33397.3	23529.4	193723	0.718645	0.718645	0.172397	0.121459	0.346229
1998	1481.42	1481.42	1481.42	-59409.7	18968.2	0.0781005	0.0781005	0.0781005	-3.13207	-0.579554		1998	-48611.4	-48611.4	-46765.2	-62631.6	339267	-0.143284	-0.143284	-0.137842	-0.184609	-0.121804		1998	113886	113886	5765.24	1989.71	191241	0.59551	0.59551	0.0301465	0.0104042	0.246314
1999	1435.4	1435.4	1435.4	-58464.6	18666.9	0.0768953	0.0768953	0.0768953	-3.13199	-0.580262		1999	-46863.3	-46863.3	-45336.3	-61453.7	311753	-0.150322	-0.150322	-0.145424	-0.197123	-0.128638		1999	177500	177500	64278.4	78239.9	201180	0.882293	0.882293	0.319507	0.388905	0.4946
2000	1065.05	1065.05	1344.88	-55915.2	17969	0.0592719	0.0592719	0.0748448	-3.11177	-0.583676		2000	-38342.3	29787.9	-41339.3	-51945.7	264446	-0.144991	0.112643	-0.156324	-0.196432	-0.077021		2000	155544	155544	53302.4	62237.3	189102	0.82254	0.82254	0.281871	0.32912	0.451214
2001	705.04	705.04	705.04	-59128.5	18474.4	0.0381631	0.0381631	0.0381631	-3.20057	-0.617216		2001	-40308.2	-40308.2	-39261.8	-45146.8	238623	-0.16892	-0.16892	-0.164535	-0.189197	-0.138314		2001	122003	122003	13712.1	21020.7	184785	0.660243	0.660243	0.0742054	0.113758	0.30169
2002	1618.96	1618.96	1618.96	-54416.3	17222.9	0.0940008	0.0940008	0.0940008	-3.15954	-0.575507		2002	-38047.3	-38047.3	-37353.9	-18986.5	231388	-0.164431	-0.164431	-0.161434	-0.082055	-0.11447		2002	110701	110701	915.606	16091.2	178574	0.619915	0.619915	0.00512731	0.0901093	0.267013
2003	922.647	922.647	922.647	-59021.7	18260.8	0.0505261	0.0505261	0.0505261	-3.23215	-0.616114		2003	-35882.1	-35882.1	-35144.8	-53638.2	196620	-0.182495	-0.182495	-0.178745	-0.272801	-0.163307		2003	112289	112289	-1533.81	24096.9	179316	0.626209	0.626209	-0.00855366	0.134383	0.275649
2004	357.457	357.457	357.457	-34490.4	13514.5	0.02645	0.02645	0.02645	-2.55211	-0.494552		2004	-39127	-39127	-38385	-2192.94	247413	-0.158145	-0.158145	-0.155146	-0.00886348	-0.0960597		2004	83556.7	83556.7	-27527.7	4346.16	173422	0.481812	0.481812	-0.158733	0.0250612	0.16599
2005	328.633	328.633	328.633	-33679.5	13540.4	0.0242705	0.0242705	0.0242705	-2.48733	-0.482904		2005	-28537.5	-28537.5	-27664.2	-3433.72	252785	-0.112892	-0.112892	-0.109437	-0.0135835	-0.0697611		2005	17307.9	17307.9	-148642	-61924.6	168633	0.102636	0.102636	-0.881451	-0.367215	-0.208679
2006	237.181	237.181	237.181	-42806.5	16164.7	0.0146728	0.0146728	0.0146728	-2.64815	-0.520826		2006	2955.93	2955.93	3843.76	-2001.39	259788	0.0113783	0.0113783	0.0147958	-0.00770396	0.00596967		2006	102.434	102.434	-149066	-70734.6	162450	0.000630555	0.000630555	-0.917606	-0.435423	-0.270354
2007	-601.015	-601.015	-601.015	-41862.8	16553.8	-0.0363068	-0.0363068	-0.0363068	-2.52889	-0.527563		2007	121788	121788	122345	15325.2	230374	0.528652	0.528652	0.531073	0.0665231	0.33098		2007	17161.5	17161.5	-106711	-46232.4	163924	0.104692	0.104692	-0.650983	-0.282036	-0.144727
2008	-19.728	-19.728	-19.728	-37412.6	14994.4	-0.0013157	-0.0013157	-0.0013157	-2.49511	-0.499812		2008	-38682.9	-38682.9	-38720.6	26001.3	360507	-0.107302	-0.107302	-0.107406	0.0721243	-0.049977		2008	51768	51768	-96601.1	-1433.35	178218	0.290477	0.290477	-0.54204	-0.00804272	0.00617407
2009	332.335	332.335	332.335	-36304.4	14877.8	0.0223376	0.0223376	0.0223376	-2.44017	-0.474631		2009	-45890.4	-61584.4	-61354.8	14285.7	363126	-0.126376	-0.169595	-0.168963	0.0393409	-0.0851186		2009	44152.6	44152.6	-78001	-18984.3	165205	0.26726	0.26726	-0.472148	-0.114914	-0.0105085
2010	817.736	817.736	1010.06	-30757	13547.9	0.0603586	0.0603586	0.0745547	-2.27024	-0.414993		2010	-99869.3	1744.83	-64521.9	-4281.22	365526	-0.273221	0.00477347	-0.176518	-0.0117125	-0.0913355		2010	133539	133539	11712.3	69632.6	181018	0.737711	0.737711	0.0647022	0.384672	0.384959
2011	244.134	244.134	244.134	-31687.9	13666	0.0178643	0.0178643	0.0178643	-2.31873	-0.453028		2011	-124898	-61163.3	-58179.9	-14282.2	413222	-0.302253	-0.148016	-0.140796	-0.034563	-0.125125		2011	125373	125373	2803.55	67820.3	176348	0.710942	0.710942	0.0158979	0.384582	0.364473
2012	-27.7079	-27.7079	-10.4415	-29926.3	13023	-0.00212762	-0.00212762	-0.000801776	-2.29796	-0.460604		2012	-91890.4	-7295.54	-39061.9	-10860.1	414841	-0.221507	-0.0175863	-0.0941611	-0.026179	-0.0718868		2012	121691	121691	-4677.61	63259.6	174041	0.699207	0.699207	-0.0268764	0.363474	0.347002
2013	-821.168		-110.29	-28348.8	13705.1	-0.0599168		-0.00804735	-2.06848	-0.53411		2013	-43544.9		-22011.6	15699.9	430066	-0.101252		-0.051182	0.0365059	-0.0289819		2013	128865		-442.209	78303.3	188292	0.684389		-0.00234853	0.415861	0.274475
2014	-1843.47		-929.837	-32069.8	14227.5	-0.12957		-0.0653547	-2.25406	-0.612247		2014	-81161.1		3101	20455.3	430563	-0.1885		0.0072022	0.0475082	-0.0334473		2014	120807		-11434.3	64641.3	186777	0.646798		-0.0612189	0.346087	0.232917
2015	-1851.05			-29164	16023.7	-0.115519			-1.82005	-0.64519		2015	-67002.9			27341.4	450613	-0.148693			0.0606759	-0.0293389		2015	114868			52229.8	165373	0.6946			0.315831	0.33681
MEAN ABS DIF	801.332	586.3	657.491	42884.9	15770.8	0.0495865	0.0350624	0.0399122	2.6808	0.54391		MEAN ABS DIF	54978.5	34453.6	40028.1	31372.8	327934	0.170031	0.119832	0.134443	0.101156	0.0988464		MEAN ABS DIF	104306	86946.8	39793.7	42291	180605	0.565854	0.469388	0.229232	0.235588	0.276154
DESV EST	944.886	575.367	680.378	11509.1	1966.49	0.0589833	0.032344	0.0405269	0.431179	0.0636458		DESV EST	46951.5	43130.1	39585.6	35159.4	78641.5	0.161805	0.168475	0.155303	0.113153	0.100277		DESV EST	49806.6	53401.3	61060.6	45127.6	11615.4	0.257135	0.274312	0.357514	0.256156	0.215696
	Industry	Industry	Industry	Industry	Industry	Industry	Industry	Industry	Industry	Industry
VOC	manufacture	manufacture	manufacture	manufacture	manufacture	manufacture	manufacture	manufacture	manufacture	manufacture
t	Production	Production	Production	Production	Production	Production	Production	Production	Production	Production
	2A-2H	2A-2H	2A-2H	2A-2H	2A-2H	2A-2H	2A-2H	2A-2H	2A-2H	2A-2H
year	GEAA-TCNA2019	GEAA-TCNA2015	GEAA-CEDS	GEAA-EDGAR	AVERAGE	GEAA-TCNA2019	GEAA-TCNA2015	GEAA-CEDS	GEAA-EDGAR	GEAA-AVERAGE
1995			-15093.4	-89916.9	68066.1			-0.221746	-1.32102	-0.695076
1996			-17786.3	-91608.9	68643			-0.259114	-1.33457	-0.72264
1997			-15135.4	-90259.2	69289.2			-0.218438	-1.30264	-0.673935
1998			-12523.3	-88230.3	69887.4			-0.179193	-1.26246	-0.662774
1999			-13731.7	-91935.9	70582			-0.194549	-1.30254	-0.684523
2000			-16739	-96118	71337.4			-0.234645	-1.34737	-0.693549
2001			-9180.03	-92591.8	72063.3			-0.127388	-1.28487	-0.582964
2002			-10976.5	-104489	72590.7			-0.151211	-1.43943	-0.581613
2003			-5548.31	-105561	72851			-0.0761597	-1.449	-0.517621
2004			-4358.33	-109189	72901.4			-0.0597839	-1.49777	-0.492893
2005			-7475.75	-114230	72746			-0.102765	-1.57026	-0.504589
2006			-2909.29	-113397	72405.3			-0.0401806	-1.56614	-0.443393
2007			-5597.23	-115363	71760.3			-0.077999	-1.60761	-0.469063
2008			-4919.72	-119057	71046.7			-0.0692463	-1.67576	-0.447064
2009			-5592.06	-117925	69899.2			-0.0800018	-1.68708	-0.446929
2010			-8920.04	-121507	68544.7			-0.130135	-1.77267	-0.480821
2011			-6958.71	-108682	66884			-0.104041	-1.62493	-0.43162
2012			-6753.46	-107134	65069.3			-0.103789	-1.64646	-0.40532
2013			-11139.9	-113844	62395			-0.178539	-1.82457	-0.442466
2014			-8932.02	-113464	58178.9			-0.153527	-1.95026	-0.355915
2015			47926	-101993	49568			0.966872	-2.05764	-0.0331278
MEAN ABS DIF			11342.7	105071	68414.7			0.177587	1.54881	0.512757
DESV EST			13255.3	10963.9	5708.22			0.249224	0.227685	0.156879

## Sheet: VAR_NH3
	Energy	Energy	Energy	Energy	Energy	Energy	Energy	Energy	Energy	Energy			Energy	Energy	Energy	Energy	Energy	Energy	Energy	Energy	Energy	Energy			Energy	Energy	Energy	Energy	Energy	Energy	Energy	Energy	Energy	Energy
N2O	Thermal	Thermal	Thermal	Thermal	Thermal	Thermal	Thermal	Thermal	Thermal	Thermal		N2O	transforamation	transforamation	transforamation	transforamation	transforamation	transforamation	transforamation	transforamation	transforamation	transforamation		N2O	Residential	Residential	Residential	Residential	Residential	Residential	Residential	Residential	Residential	Residential
t	power plants	power plants	power plants	power plants	power plants	power plants	power plants	power plants	power plants	power plants		t	Refinery	Refinery	Refinery	Refinery	Refinery	Refinery	Refinery	Refinery	Refinery	Refinery		t	RCAO	RCAO	RCAO	RCAO	RCAO	RCAO	RCAO	RCAO	RCAO	RCAO
	1A1a	1A1a	1A1a	1A1a	1A1a	1A1a	1A1a	1A1a	1A1a	1A1a			1A1bc	1A1bc	1A1bc	1A1bc	1A1bc	1A1bc	1A1bc	1A1bc	1A1bc	1A1bc			1A4abc	1A4abc	1A4abc	1A4abc	1A4abc	1A4abc	1A4abc	1A4abc	1A4abc	1A4abc
year	GEAA-TCNA2019	GEAA-TCNA2015	GEAA-CEDS	GEAA-EDGAR	AVERAGE	GEAA-TCNA2019	GEAA-TCNA2015	GEAA-CEDS	GEAA-EDGAR	GEAA-AVERAGE		year	GEAA-TCNA2019	GEAA-TCNA2015	GEAA-CEDS	GEAA-EDGAR	AVERAGE	GEAA-TCNA2019	GEAA-TCNA2015	GEAA-CEDS	GEAA-EDGAR	GEAA-AVERAGE		year	GEAA-TCNA2019	GEAA-TCNA2015	GEAA-CEDS	GEAA-EDGAR	AVERAGE	GEAA-TCNA2019	GEAA-TCNA2015	GEAA-CEDS	GEAA-EDGAR	GEAA-AVERAGE
1995			-130.844	-134.106	177.354			-0.737755	-0.756148	-0.497968		1995												1995
1996			-163.559	-163.557	220.395			-0.742115	-0.742108	-0.494741		1996												1996
1997			-115.167	-115.161	159.898			-0.720252	-0.720212	-0.480155		1997												1997
1998			-135.715	-135.713	224.797			-0.603723	-0.603715	-0.402479		1998												1998
1999			-134.436	-134.434	234.184			-0.57406	-0.574053	-0.382704		1999												1999
2000			-187.142	-187.14	250.084			-0.748316	-0.748307	-0.498874		2000												2000
2001			-157.242	-157.241	164.406			-0.956428	-0.956419	-0.637616		2001												2001
2002			-242.607	-242.607	203.972			-1.18941	-1.18941	-0.792941		2002												2002
2003			-286.599	-286.598	246.95			-1.16055	-1.16055	-0.773702		2003												2003
2004			-373.862	-506.512	434.844			-0.859761	-1.16481	-0.674858		2004												2004
2005			-392.387	-523.878	474.429			-0.827071	-1.10423	-0.643766		2005												2005
2006			-469.72	-534.166	529.594			-0.886945	-1.00863	-0.63186		2006												2006
2007			-506.8	-571.164	632.072			-0.801806	-0.903637	-0.568481		2007												2007
2008			-612.851	-621.745	739.884			-0.828307	-0.840328	-0.556212		2008												2008
2009			-707.582	-648.764	697.543			-1.01439	-0.93007	-0.648154		2009												2009
2010			-624.292	-869.937	816.791			-0.764323	-1.06507	-0.609797		2010												2010
2011			-647.688	-916.017	882.756			-0.733711	-1.03768	-0.590463		2011												2011
2012			-708.204	-966.928	956.273			-0.740587	-1.01114	-0.58391		2012												2012
2013			-694.012	-1051.36	916.786			-0.757005	-1.14679	-0.634597		2013												2013
2014			-635.302	-867.334	884.339			-0.718391	-0.980771	-0.566388		2014												2014
2015				-960.124	908.363				-1.05698	-0.528492		2015												2015
MEAN ABS DIF			377.429	504.499	512.177			0.779282	0.938146	0.580865		MEAN ABS DIF												MEAN ABS DIF
DESV EST			229.051	332.463	302.572			0.159212	0.186815	0.103703		DESV EST												DESV EST
	Energy	Energy	Energy	Energy	Energy	Energy	Energy	Energy	Energy	Energy			Energy	Energy	Energy	Energy	Energy	Energy	Energy	Energy	Energy	Energy			Energy	Energy	Energy	Energy	Energy	Energy	Energy	Energy	Energy	Energy
N2O	Industry	Industry	Industry	Industry	Industry	Industry	Industry	Industry	Industry	Industry		N2O	Transport	Industry	Industry	Industry	Industry	Industry	Industry	Industry	Industry	Industry		N2O	fugitve	Industry	Industry	Industry	Industry	Industry	Industry	Industry	Industry	Industry
t	own energy	own energy	own energy	own energy	own energy	own energy	own energy	own energy	own energy	own energy		t	R+RR+Nav	R+RR+Nav	R+RR+Nav	R+RR+Nav	R+RR+Nav	R+RR+Nav	R+RR+Nav	R+RR+Nav	R+RR+Nav	R+RR+Nav		t	fuels prod	R+RR+Nav	R+RR+Nav	R+RR+Nav	R+RR+Nav	R+RR+Nav	R+RR+Nav	R+RR+Nav	R+RR+Nav	R+RR+Nav
	1A2	1A2	1A2	1A2	1A2	1A2	1A2	1A2	1A2	1A2			1A3bc	1A3bc	1A3bc	1A3bc	1A3bc	1A3bc	1A3bc	1A3bc	1A3bc	1A3bc			1B1-1B2	1B1-1B2	1B1-1B2	1B1-1B2	1B1-1B2	1B1-1B2	1B1-1B2	1B1-1B2	1B1-1B2	1B1-1B2
year	GEAA-TCNA2019	GEAA-TCNA2015	GEAA-CEDS	GEAA-EDGAR	AVERAGE	GEAA-TCNA2019	GEAA-TCNA2015	GEAA-CEDS	GEAA-EDGAR	GEAA-AVERAGE		year	GEAA-TCNA2019	GEAA-TCNA2015	GEAA-CEDS	GEAA-EDGAR	AVERAGE	GEAA-TCNA2019	GEAA-TCNA2015	GEAA-CEDS	GEAA-EDGAR	GEAA-AVERAGE		year	GEAA-TCNA2019	GEAA-TCNA2015	GEAA-CEDS	GEAA-EDGAR	AVERAGE	GEAA-TCNA2019	GEAA-TCNA2015	GEAA-CEDS	GEAA-EDGAR	GEAA-AVERAGE
1995												1995			10520.9	9615.28	5713.25			1.84149	1.68298	0.841489		1995			-4975.21	-4961.3	3479.17			-1.43	-1.426	-0.952001
1996												1996			10596	9626.75	5782.61			1.83239	1.66478	0.832388		1996			-5083.01	-5068.19	3554.86			-1.42988	-1.42571	-0.951862
1997												1997			10210.6	9118.77	5651.26			1.80679	1.61358	0.806791		1997			-3825.8	-3810.81	2734.92			-1.39887	-1.39339	-0.930752
1998												1998			10063.5	8865.81	5630.56			1.78729	1.57459	0.787295		1998			-3933.34	-3918.69	2816.28			-1.39665	-1.39144	-0.929362
1999												1999			9435.73	8176.24	5347.61			1.76448	1.52895	0.764476		1999			-4580.8	-4567.41	3252.64			-1.40833	-1.40422	-0.937517
2000												2000			8853.62	7478.88	5114.19			1.73119	1.46238	0.731189		2000			-3853.13	-3840.6	2747.05			-1.40264	-1.39808	-0.933574
2001												2001			7527.4	5845.59	4604.61			1.63475	1.26951	0.634755		2001			-3952.87	-3940	2838.9			-1.39239	-1.38786	-0.926751
2002												2002			7328.09	5494.16	4581.01			1.59967	1.19933	0.599667		2002			-4023.58	-4011.43	2871.4			-1.40126	-1.39703	-0.932765
2003												2003			6474.05	4179.65	4384.23			1.47667	0.953338	0.476669		2003			-4165.58	-4154.08	2974.51			-1.40042	-1.39656	-0.932327
2004												2004			8016.61	5366.13	5333.55			1.50305	1.00611	0.503054		2004			-4367.03	-4356.54	3113.61			-1.40256	-1.39919	-0.933919
2005												2005			8003.87	5180.86	5413.44			1.47852	0.957037	0.478519		2005			-6895.57	-6886.66	4799.69			-1.43667	-1.43481	-0.95716
2006												2006			9027.6	6219.44	5917.88			1.52548	1.05096	0.525478		2006			-4735.05	-4703.78	3360.31			-1.40911	-1.39981	-0.936306
2007												2007			10147.8	7388.87	6453.38			1.57248	1.14496	0.57248		2007			-4384.58	-4436.42	3168.49			-1.38381	-1.40017	-0.927994
2008												2008			11471	8731.33	7105.36			1.61442	1.22884	0.614419		2008			-4646.69	-4777.28	3358.3			-1.38364	-1.42253	-0.93539
2009												2009			10856.8	8177.43	6768.07			1.60412	1.20824	0.604118		2009			-4832.43	-4779.07	3409.01			-1.41755	-1.40189	-0.939813
2010												2010			10942	8171.6	6856.19			1.59593	1.19186	0.595929		2010			-5032.8	-5101.92	3595.86			-1.39961	-1.41883	-0.939479
2011												2011			11629.8	8684.65	7287.5			1.59586	1.19172	0.595859		2011			-5089.19	-4966.9	3567.49			-1.42655	-1.39227	-0.939604
2012												2012			12095.4	9056.14	7567.32			1.59837	1.19674	0.598372		2012			-5134.2	-5305.16	3705.75			-1.38547	-1.4316	-0.939024
2013												2013			13103.1	10047.4	8079.4			1.62179	1.24358	0.621792		2013			-5189.31	-4705.09	3524.89			-1.47219	-1.33482	-0.935671
2014												2014			12892.9	9773.69	8006.02			1.6104	1.22079	0.610396		2014			-5244.42	-6445.64	4124.11			-1.27165	-1.56292	-0.944856
2015												2015				10121.8	8327.56				1.21546	0.60773		2015				-6730.12	3600.99				-1.86896	-0.934482
MEAN ABS DIF												MEAN ABS DIF			9485.56	7872.41	6186.9			1.56167	1.27646	0.638232		MEAN ABS DIF			4473.55	4831.77	3361.82			1.33568	1.43277	0.937648
DESV EST												DESV EST			1859.21	1805.3	1201.26			0.114833	0.224286	0.112143		DESV EST			712.523	897.081	492.16			0.0374823	0.107924	0.00801918

## Sheet: VAR_N2O
	Energy	Energy	Energy	Energy	Energy	Energy	Energy	Energy	Energy	Energy			Energy	Energy	Energy	Energy	Energy	Energy	Energy	Energy	Energy	Energy			Energy	Energy	Energy	Energy	Energy	Energy	Energy	Energy	Energy	Energy
N2O	Thermal	Thermal	Thermal	Thermal	Thermal	Thermal	Thermal	Thermal	Thermal	Thermal		N2O	transforamation	transforamation	transforamation	transforamation	transforamation	transforamation	transforamation	transforamation	transforamation	transforamation		N2O	Residential	Residential	Residential	Residential	Residential	Residential	Residential	Residential	Residential	Residential
t	power plants	power plants	power plants	power plants	power plants	power plants	power plants	power plants	power plants	power plants		t	Refinery	Refinery	Refinery	Refinery	Refinery	Refinery	Refinery	Refinery	Refinery	Refinery		t	RCAO	RCAO	RCAO	RCAO	RCAO	RCAO	RCAO	RCAO	RCAO	RCAO
	1A1a	1A1a	1A1a	1A1a	1A1a	1A1a	1A1a	1A1a	1A1a	1A1a			1A1bc	1A1bc	1A1bc	1A1bc	1A1bc	1A1bc	1A1bc	1A1bc	1A1bc	1A1bc			1A4abc	1A4abc	1A4abc	1A4abc	1A4abc	1A4abc	1A4abc	1A4abc	1A4abc	1A4abc
year	GEAA-TCNA2019	GEAA-TCNA2015	GEAA-CEDS	GEAA-EDGAR	AVERAGE	GEAA-TCNA2019	GEAA-TCNA2015	GEAA-CEDS	GEAA-EDGAR	GEAA-AVERAGE		year	GEAA-TCNA2019	GEAA-TCNA2015	GEAA-CEDS	GEAA-EDGAR	AVERAGE	GEAA-TCNA2019	GEAA-TCNA2015	GEAA-CEDS	GEAA-EDGAR	GEAA-AVERAGE		year	GEAA-TCNA2019	GEAA-TCNA2015	GEAA-CEDS	GEAA-EDGAR	AVERAGE	GEAA-TCNA2019	GEAA-TCNA2015	GEAA-CEDS	GEAA-EDGAR	GEAA-AVERAGE
1995	537.675	542.066		525.435	210.362	2.55594	2.57682		2.49776	1.90763		1995	2.69606	-9.47731		-6.55008	31.7559	0.0848998	-0.298443		-0.206264	-0.104952		1995	18.7672	-6.78378		7.47083	189.244	0.0991691	-0.0358467		0.0394772	0.0256999
1996	665.2	669.1		645.698	245.927	2.70487	2.72073		2.62557	2.01279		1996	2.14677	0.236522		-3.12314	28.8588	0.0743887	0.00819584		-0.108221	-0.00640923		1996	-3.09156	-28.7887		-24.9588	191.292	-0.0161614	-0.150496		-0.130475	-0.0742829
1997	666.826	669.433		646.223	230.225	2.89641	2.90773		2.80692	2.15277		1997	4.54798	-2.3032		-2.57358	37.299	0.121933	-0.0617496		-0.0689985	-0.0022038		1997	-14.79	-13.9978		-21.5063	189.424	-0.0780787	-0.0738965		-0.113535	-0.0663775
1998	653.621	656.986		639.105	239.555	2.72848	2.74253		2.66788	2.03472		1998	8.94838	1.44535		1.41796	35.0787	0.255094	0.0412031		0.0404222	0.0841798		1998	-26.9328	-10.9072		-10.0815	196.878	-0.136799	-0.0554006		-0.0512065	-0.0608516
1999	820.8	822.717		803.801	292.769	2.80357	2.81012		2.74551	2.0898		1999	1.023	-9.44499		-10.3199	34.0259	0.0300653	-0.277582		-0.303297	-0.137703		1999	-38.8288	-49.712		-33.058	196.661	-0.19744	-0.25278		-0.168096	-0.154579
2000	842.398	-8.46651		805.855	509.713	1.65269	-0.0166104		1.581	0.804271		2000	-2.76662	-11.8538		-12.253	33.1996	-0.0833329	-0.357046		-0.369071	-0.202363		2000	-22.8223	-43.2835		-26.507	190.118	-0.120043	-0.227667		-0.139424	-0.121783
2001	696.125	697.965		656.201	231.136	3.01175	3.01971		2.83902	2.21762		2001	-0.503992	-13.0159		-13.8184	32.7617	-0.0153836	-0.39729		-0.421786	-0.208615		2001	-31.655	-1.99605		10.0715	192.054	-0.164824	-0.0103932		0.052441	-0.030694
2002	613.027	614.854		553.941	202.38	3.02909	3.03812		2.73713	2.20108		2002	3.32146	-2.88183		-2.35092	31.6873	0.10482	-0.0909458		-0.0741913	-0.0150793		2002	-26.5252	0.729175		6.4849	186.093	-0.142537	0.00391833		0.0348476	-0.0259427
2003	687.835	688.62		619.02	230.28	2.98696	2.99037		2.68812	2.16636		2003	4.87063	2.63927		2.60733	33.5311	0.145257	0.078711		0.0777586	0.0754317		2003	-56.4079	-43.1764		-41.7139	200.748	-0.280989	-0.215078		-0.207792	-0.175965
2004	797.169	799.64		699.6	300.344	2.65418	2.66241		2.32933	1.91148		2004	1.79434	-3.16277		-2.69221	31.3172	0.0572955	-0.100991		-0.0859658	-0.0324154		2004	-75.5288	-86.6427		-64.8113	220.556	-0.342448	-0.392838		-0.293854	-0.257285
2005	876.81	875.831		783.012	334.843	2.61857	2.61565		2.33844	1.89317		2005	1.86144	-4.35344		-4.1711	30.0565	0.0619315	-0.144842		-0.138775	-0.0554214		2005	-41.2006	-70.9041		-41.8353	226.752	-0.181699	-0.312694		-0.184498	-0.169723
2006	894.914	899.247		821.25	349.884	2.55775	2.57013		2.34721	1.86877		2006	1.10519	-2.32152		-3.13424	30.8379	0.0358386	-0.0752813		-0.101636	-0.0352697		2006	-16.1093	33.069		-16.2352	231.794	-0.0694983	0.142665		-0.0700414	0.000781389
2007	887.589	912.805		833.558	383.917	2.31193	2.37761		2.17119	1.71518		2007	-0.752984	-4.54133		-2.8608	33.3736	-0.0225623	-0.136076		-0.0857206	-0.0610896		2007	-17.2308	47.7465		6.78872	231.459	-0.0744442	0.206284		0.0293301	0.0402925
2008	98.7147	991.403		929.467	639.761	0.154299	1.54965		1.45284	0.789195		2008	-7.78755	-5.38701		-5.99865	34.9338	-0.222923	-0.154206		-0.171715	-0.137211		2008	-56.2793	-31.1353		-77.9187	239.191	-0.23529	-0.130169		-0.325759	-0.172805
2009	79.0357	964.681		894.654	613.681	0.12879	1.57196		1.45785	0.789649		2009	-1.64854	7.62861		-0.230584	34.7434	-0.047449	0.21957		-0.00663676	0.041371		2009	-17.8286	2.50426		-39.7686	240.753	-0.0740533	0.0104018		-0.165184	-0.057209
2010	18.9627	-13.225		761.073	845.241	0.0224347	-0.0156464		0.900421	0.226802		2010	-4.42915	7.12231		-3.37769	32.8447	-0.134851	0.216848		-0.102838	-0.00521036		2010	56.0975	32.8848		15.4692	209.468	0.267809	0.156992		0.0738499	0.124663
2011	-14.9526	953.856		849.003	698.525	-0.021406	1.36553		1.21542	0.639886		2011	-4.01238	5.70341		-4.12878	31.54	-0.127216	0.180831		-0.130906	-0.0193227		2011	9.89054	16.8126		11.5694	206.135	0.0479809	0.0815609		0.0561253	0.0464168
2012	20.2908	-19.3516		932.751	1022.87	0.0198371	-0.0189189		0.911895	0.228203		2012	-2.93781	6.56562		-3.50243	32.7054	-0.0898265	0.20075		-0.10709	0.000958392		2012	-15.2466	-10.6972		-19.6883	203.479	-0.0749295	-0.0525716		-0.0967585	-0.0560649
2013	71.5761			932.582	925.49	0.0773386			1.00766	0.361667		2013	-3.56596			-1.1355	34.0809	-0.104632			-0.0333178	-0.0459834		2013	-25.7036			-44.102	208.302	-0.123396			-0.211722	-0.111706
2014	42.37			991.017	936.44	0.0452458			1.05828	0.367843		2014	-4.0772			-6.83215	35.6951	-0.114223			-0.191403	-0.101875		2014	-19.6808			-81.4729	215.438	-0.0913525			-0.378173	-0.156509
2015	42.7576			992.251	956.471	0.0447035			1.03741	0.360704		2015	-4.58113			-6.18554	36.8512	-0.124315			-0.167852	-0.0973888		2015	101.929			-42.396	205.352	0.496363			-0.206455	0.096636
MEAN ABS DIF	477.555	561.917		776.928	495.229	1.66792	1.78906	0	1.97223	1.36855		MEAN ABS DIF	3.30374	4.76591		4.72686	33.1989	0.0980113	0.144789		0.142565	0.0700216		MEAN ABS DIF	32.9784	25.3224		30.6623	208.152	0.157872	0.119603		0.14424	0.0964889
DESV EST	359.048	332.659		141.741	292.636	1.32296	1.0885	#DIV/0!	0.73977	0.788373		DESV EST	4.01112	6.42836		4.06608	2.14963	0.117253	0.194876		0.121486	0.0791653		DESV EST	38.5547	35.8795		28.8883	17.4561	0.184354	0.165502		0.132189	0.0986856
	Energy	Energy	Energy	Energy	Energy	Energy	Energy	Energy	Energy	Energy			Energy	Energy	Energy	Energy	Energy	Energy	Energy	Energy	Energy	Energy			Energy	Energy	Energy	Energy	Energy	Energy	Energy	Energy	Energy	Energy
N2O	Industry	Industry	Industry	Industry	Industry	Industry	Industry	Industry	Industry	Industry		N2O	Transport	Industry	Industry	Industry	Industry	Industry	Industry	Industry	Industry	Industry		N2O	fugitve	Industry	Industry	Industry	Industry	Industry	Industry	Industry	Industry	Industry
t	own energy	own energy	own energy	own energy	own energy	own energy	own energy	own energy	own energy	own energy		t	R+RR+Nav	R+RR+Nav	R+RR+Nav	R+RR+Nav	R+RR+Nav	R+RR+Nav	R+RR+Nav	R+RR+Nav	R+RR+Nav	R+RR+Nav		t	fuels prod	R+RR+Nav	R+RR+Nav	R+RR+Nav	R+RR+Nav	R+RR+Nav	R+RR+Nav	R+RR+Nav	R+RR+Nav	R+RR+Nav
	1A2	1A2	1A2	1A2	1A2	1A2	1A2	1A2	1A2	1A2			1A3bc	1A3bc	1A3bc	1A3bc	1A3bc	1A3bc	1A3bc	1A3bc	1A3bc	1A3bc			1B1-1B2	1B1-1B2	1B1-1B2	1B1-1B2	1B1-1B2	1B1-1B2	1B1-1B2	1B1-1B2	1B1-1B2	1B1-1B2
year	GEAA-TCNA2019	GEAA-TCNA2015	GEAA-CEDS	GEAA-EDGAR	AVERAGE	GEAA-TCNA2019	GEAA-TCNA2015	GEAA-CEDS	GEAA-EDGAR	GEAA-AVERAGE		year	GEAA-TCNA2019	GEAA-TCNA2015	GEAA-CEDS	GEAA-EDGAR	AVERAGE	GEAA-TCNA2019	GEAA-TCNA2015	GEAA-CEDS	GEAA-EDGAR	GEAA-AVERAGE		year	GEAA-TCNA2019	GEAA-TCNA2015	GEAA-CEDS	GEAA-EDGAR	AVERAGE	GEAA-TCNA2019	GEAA-TCNA2015	GEAA-CEDS	GEAA-EDGAR	GEAA-AVERAGE
1995	320.019	9.55754		-76.9366	333.611	0.959257	0.0286488		-0.230618	0.189322		1995	1452.04	-14.6968		2077.03	2040.81	0.711499	-0.00720143		1.01775	0.430512		1995	-9.06213	-9.4188		-53.807	42.3128	-0.21417	-0.222599		-1.27165	-0.427104
1996	319.921	16.8352		-71.3627	328.446	0.974045	0.0512573		-0.217274	0.202007		1996	1068.21	-81.0321		2008.95	2125.19	0.502643	-0.0381294		0.945304	0.352455		1996	-12.2444	-12.2767		-43.9743	41.6186	-0.294205	-0.294982		-1.0566	-0.411447
1997	369.417	11.0804		-101.658	377.614	0.978291	0.0293431		-0.26921	0.184606		1997	1020.84	-179.178		1892.81	2097.04	0.486801	-0.0854431		0.902609	0.325992		1997	-12.1801	-12.4339		-35.0249	41.4378	-0.293937	-0.300062		-0.845241	-0.35981
1998	409.512	57.2976		-113.47	407.033	1.00609	0.140769		-0.278772	0.217022		1998	948.731	-245.375		1848.63	2131.82	0.445034	-0.115101		0.867162	0.299274		1998	-10.9994	-11.1731		-26.429	40.5075	-0.27154	-0.275828		-0.652447	-0.299954
1999	402.344	50.3348		-118.552	400.588	1.00438	0.125652		-0.295945	0.208523		1999	870.534	-264.069		1694.35	1999.01	0.435481	-0.1321		0.847592	0.287743		1999	-7.1529	-8.1158		-32.6041	41.648	-0.171747	-0.194867		-0.78285	-0.287366
2000	373.622	23.0674		-110.822	385.39	0.969467	0.0598549		-0.287559	0.185441		2000	854.635	-302.009		1586.13	1851.27	0.461647	-0.163136		0.856778	0.288822		2000	-7.25568	-8.47166		-22.2918	37.6291	-0.192821	-0.225136		-0.592408	-0.252591
2001	355.055	4.06677		-166.854	385.605	0.920774	0.0105465		-0.432708	0.124653		2001	436.194	-278.33		1277.17	1689.07	0.258246	-0.164783		0.75614	0.212401		2001	-6.82734	-7.13529		-22.2936	38.7862	-0.176025	-0.183964		-0.574782	-0.233693
2002	365.77	74.7915		-109.945	368.772	0.991858	0.202812		-0.298137	0.224133		2002	500.266	-281.72		1262.87	1624.56	0.30794	-0.173413		0.777359	0.227971		2002	-7.10009	-7.32244		-23.5477	38.3532	-0.185124	-0.190921		-0.61397	-0.247504
2003	324.89	27.2976		-179.87	382.374	0.849665	0.0713898		-0.470402	0.112663		2003	200.115	-364.035		963.692	1555.22	0.128673	-0.234072		0.619649	0.128562		2003	-5.38778	-5.6517		-21.2312	38.1733	-0.14114	-0.148054		-0.55618	-0.211343
2004	297.878	-9.9987		-2.50495	342.458	0.869824	-0.0291968		-0.00731461	0.208328		2004	523.535	-345.757		1331.42	1817.06	0.288122	-0.190284		0.732733	0.207643		2004	-4.14341	-4.39503		-19.3008	36.4904	-0.113548	-0.120443		-0.528929	-0.19073
2005	308.486	-10.7075		41.3907	345.43	0.89305	-0.0309975		0.119824	0.245469		2005	462.684	-392.922		1286.72	1861.76	0.248519	-0.211048		0.691131	0.182151		2005	-3.59306	-3.8228		-34.6654	39.1574	-0.0917594	-0.0976264		-0.885283	-0.268667
2006	344.74	-29.5039		-6.16724	395.581	0.871478	-0.0745837		-0.0155903	0.195326		2006	572.314	-167.804		1473.24	1967.2	0.290929	-0.0853009		0.748905	0.238633		2006	-2.69768	-2.95231		-16.6587	34.9536	-0.0771791	-0.0844637		-0.476594	-0.159559
2007	363.481	-79.4312		25.1187	420.01	0.865409	-0.189117		0.059805	0.184024		2007	795.976	684.091		1826.93	1992.22	0.399542	0.343381		0.917034	0.414989		2007	0.27401	-0.00659644		-10.6822	34.5856	0.00792268	-0.000190728		-0.308864	-0.0752831
2008	333.95	-38.1243		36.7209	385.377	0.866555	-0.0989273		0.0952858	0.215728		2008	993.784	40.8395		2054.06	2335.5	0.425513	0.0174864		0.879498	0.330624		2008	1.78301	-0.83517		-11.0645	35.7499	0.0498745	-0.0233615		-0.309499	-0.0707464
2009	344.176	-29.8255		47.6041	382.952	0.898744	-0.0778833		0.124308	0.236292		2009	1021.77	-135.072		1953.92	2245.98	0.454931	-0.0601392		0.869963	0.316189		2009	2.78945	2.56846		-12.5169	34.8839	0.0799639	0.073629		-0.358816	-0.0513059
2010	286.6	4.28881		102.968	382.599	0.749088	0.0112097		0.269127	0.257356		2010	495.393	-585.388		1923.62	2541.26	0.19494	-0.230353		0.756953	0.180385		2010	5.15384	4.8798		-11.5953	35.1326	0.146697	0.138897		-0.330043	-0.0111125
2011	261.222	-24.8978		76.6832	375.794	0.695119	-0.0662538		0.204057	0.208231		2011	650.278	-597.528		2018.32	2707.13	0.24021	-0.220724		0.745558	0.191261		2011	6.41666	6.17106		-10.7537	33.8792	0.189398	0.182149		-0.317414	0.0135333
2012	219.366	-55.9693		51.4031	363.37	0.603698	-0.154028		0.141462	0.147783		2012	846.597	-509.218		2122.14	2739.44	0.30904	-0.185884		0.774663	0.224455		2012	7.30146	7.07857		-20.1595	36.4494	0.200318	0.194202		-0.553083	-0.0396406
2013	186.03			53.9432	309.418	0.601224			0.174337	0.258521		2013	1004.62			2377.52	2452.44	0.409642			0.969448	0.459697		2013	8.08122			-18.2036	38.4865	0.209976			-0.472987	-0.0876705
2014	146.048			-56.7702	292.543	0.499235			-0.194058	0.101726		2014	1052.23			2349.61	2410.55	0.43651			0.974718	0.470409		2014	8.92395			-31.0616	42.9622	0.207716			-0.723	-0.171761
2015	157.771			-18.5775	287.111	0.549511			-0.0647051	0.161602		2015	1171.21			2483.17	2503.87	0.467758			0.991732	0.486497		2015	10.092			-29.3407	43.2704	0.23323			-0.678079	-0.148283
MEAN ABS DIF	309.062	26.5274		74.7296	364.385	0.838894	0.0691653		0.202405	0.19375		MEAN ABS DIF	806.76	260.431		1800.59	2128.02	0.376363	0.12657		0.840127	0.297936		MEAN ABS DIF	6.64093	5.46234		24.1527	38.4032	0.168966	0.140542		0.613749	0.191386
DESV EST	75.5224	39.6381		84.0438	36.8017	0.158815	0.102057		0.223617	0.0439407		DESV EST	303.851	287.07		412.15	342.872	0.131443	0.136349		0.108527	0.105988		DESV EST	7.34621	6.21344		11.4553	3.00149	0.184576	0.160168		0.252591	0.127977
	Industry	Industry	Industry	Industry	Industry	Industry	Industry	Industry	Industry	Industry
N2O	manufacture	manufacture	manufacture	manufacture	manufacture	manufacture	manufacture	manufacture	manufacture	manufacture
t	Production	Production	Production	Production	Production	Production	Production	Production	Production	Production
	2A-2H	2A-2H	2A-2H	2A-2H	2A-2H	2A-2H	2A-2H	2A-2H	2A-2H	2A-2H
year	GEAA-TCNA2019	GEAA-TCNA2015	GEAA-CEDS	GEAA-EDGAR	AVERAGE	GEAA-TCNA2019	GEAA-TCNA2015	GEAA-CEDS	GEAA-EDGAR	GEAA-AVERAGE
1995			463.679	97.66	571.402			0.811476	0.170913	-0.188524
1996			419.763	79.4682	580.202			0.723476	0.136966	-0.276524
1997			528.272	123.735	591.173			0.8936	0.209303	-0.1064
1998			555.619	239.858	599.556			0.926718	0.400059	-0.0732819
1999			521.619	132.638	609.489			0.855829	0.217622	-0.144171
2000			533.366	35.1558	620.095			0.860136	0.0566942	-0.139864
2001			959.712	307.26	629.696			1.52409	0.487949	0.524088
2002			1027.47	391.766	630.555			1.62947	0.621304	0.629473
2003			1119.35	458.082	629.701			1.77759	0.727458	0.777585
2004			1063.45	384.72	625.603			1.69987	0.614959	0.699871
2005			1110.49	430.517	622.149			1.78493	0.691984	0.78493
2006			1144.59	380.574	616.265			1.8573	0.617548	0.857301
2007			1011.88	432.934	606.231			1.66914	0.71414	0.66914
2008			919.314	401.226	605.461			1.51837	0.662679	0.518369
2009			982.069	356.53	609.896			1.61022	0.584575	0.610224
2010			1034.05	420.732	608.736			1.69868	0.691156	0.698675
2011			1069.85	455.238	606.123			1.76507	0.751066	0.765072
2012			1130.67	514.736	600.481			1.88294	0.857207	0.882939
2013			1028.09	410.827	588.671			1.74646	0.69789	0.74646
2014			1040.48	421.895	580.747			1.79163	0.726469	0.791626
2015			1084.8	464.906	566.937			1.91344	0.820031	0.913444
MEAN ABS DIF			892.79	330.498	604.722			1.47335	0.545618	0.561808
DESV EST			259.134	147.866	19.0978			0.420731	0.244657	0.420731

## Sheet: VAR_SO2
	Energy	Energy	Energy	Energy	Energy	Energy	Energy	Energy	Energy	Energy			Energy	Energy	Energy	Energy	Energy	Energy	Energy	Energy	Energy	Energy			Energy	Energy	Energy	Energy	Energy	Energy	Energy	Energy	Energy	Energy
SO2	Thermal	Thermal	Thermal	Thermal	Thermal	Thermal	Thermal	Thermal	Thermal	Thermal		SO2	transforamation	transforamation	transforamation	transforamation	transforamation	transforamation	transforamation	transforamation	transforamation	transforamation		SO2	Residential	Residential	Residential	Residential	Residential	Residential	Residential	Residential	Residential	Residential
t	power plants	power plants	power plants	power plants	power plants	power plants	power plants	power plants	power plants	power plants		t	Refinery	Refinery	Refinery	Refinery	Refinery	Refinery	Refinery	Refinery	Refinery	Refinery		t	RCAO	RCAO	RCAO	RCAO	RCAO	RCAO	RCAO	RCAO	RCAO	RCAO
	1A1a	1A1a	1A1a	1A1a	1A1a	1A1a	1A1a	1A1a	1A1a	1A1a			1A1bc	1A1bc	1A1bc	1A1bc	1A1bc	1A1bc	1A1bc	1A1bc	1A1bc	1A1bc			1A4abc	1A4abc	1A4abc	1A4abc	1A4abc	1A4abc	1A4abc	1A4abc	1A4abc	1A4abc
year	GEAA-TCNA2019	GEAA-TCNA2015	GEAA-CEDS	GEAA-EDGAR	AVERAGE	GEAA-TCNA2019	GEAA-TCNA2015	GEAA-CEDS	GEAA-EDGAR	GEAA-AVERAGE		year	GEAA-TCNA2019	GEAA-TCNA2015	GEAA-CEDS	GEAA-EDGAR	AVERAGE	GEAA-TCNA2019	GEAA-TCNA2015	GEAA-CEDS	GEAA-EDGAR	GEAA-AVERAGE		year	GEAA-TCNA2019	GEAA-TCNA2015	GEAA-CEDS	GEAA-EDGAR	AVERAGE	GEAA-TCNA2019	GEAA-TCNA2015	GEAA-CEDS	GEAA-EDGAR	GEAA-AVERAGE
1995	7528.8	-287.486	-3538.87	-35250.2	35526.1	0.211923	-0.00809225	-0.0996131	-0.992233	-0.177603		1995	1176.31	-1249.19	1176.31	-20109.7	12545.3	0.0937652	-0.0995739	0.0937652	-1.60297	-0.303002		1995	-513.908	-746.549	-6602.57	-21905.9	13548.1	-0.0379322	-0.0551038	-0.487345	-1.6169	-0.439456
1996	8655.97	5871.6	-936.035	-43508.7	33542.8	0.258057	0.175048	-0.0279057	-1.29711	-0.178382		1996	1971.31	687.126	1971.31	-18044.5	10937.8	0.180229	0.0628212	0.180229	-1.64973	-0.245291		1996	-408.526	208.518	-6079.41	-22963.2	14165.2	-0.0288401	0.0147204	-0.429178	-1.6211	-0.412879
1997	5448.71	-416.386	-4182.11	-30677.7	24452.5	0.222828	-0.0170283	-0.17103	-1.25458	-0.243962		1997	863.139	2706.22	863.139	-28266.7	13756.6	0.0627435	0.196721	0.0627435	-2.05477	-0.346513		1997	-695.321	-997.922	-6941.94	-20843.4	13623	-0.0510401	-0.0732526	-0.509574	-1.53001	-0.432776
1998	10800.1	15237.2	6016.07	-48065.2	31477.9	0.343101	0.484062	0.19112	-1.52695	-0.101734		1998	-61.0756	-2580.36	-61.0756	-21566.8	10400.1	-0.00587258	-0.248108	-0.00587258	-2.0737	-0.466711		1998	-942.297	-652.345	-5455.18	-21371.9	13454.6	-0.0700351	-0.0484848	-0.40545	-1.58844	-0.422482
1999	11165.7	13958.5	6579.09	-46981.1	34489.5	0.323742	0.404716	0.190756	-1.36219	-0.0885943		1999	-991.568	-140.913	-991.568	-24888.4	10868.9	-0.0912296	-0.0129648	-0.0912296	-2.28987	-0.497058		1999	-803.185	-794.582	-5096.99	-20717	13400.4	-0.0599375	-0.0592956	-0.380362	-1.54601	-0.40912
2000	8939.8	6183.58	-1814.91	-38084.4	31407	0.284644	0.196886	-0.0577867	-1.21261	-0.157773		2000	-1040.75	-1238.83	-434.012	-22793.4	10320.6	-0.100842	-0.120035	-0.0420531	-2.20854	-0.494294		2000	-876.767	-858.212	-4892.21	-20223.8	13233.2	-0.0662553	-0.0648531	-0.369693	-1.52826	-0.405813
2001	2406.98	-8258.39	-3131.73	-10299	13110	0.183598	-0.629929	-0.238881	-0.785581	-0.294158		2001	-2170.3	-2619.88	-2170.3	-26795.3	10391.2	-0.20886	-0.252124	-0.20886	-2.57865	-0.649699		2001	-518.02	-1975.53	-4827.25	-17981.6	11824.7	-0.0438083	-0.167069	-0.408236	-1.52068	-0.427959
2002	717.323	-4096.98	-4248.3	-10628.6	6400.95	0.112065	-0.640058	-0.663697	-1.66047	-0.570432		2002	320.732	-2459.54	320.732	-10720.8	5858.59	0.0547456	-0.419818	0.0547456	-1.82993	-0.428051		2002	-262.268	-721.659	-4844.91	-13184.4	10363.2	-0.0253076	-0.0696365	-0.46751	-1.27223	-0.366937
2003	1670.68	2492.73	-3450.13	-15382	7458.79	0.223988	0.334201	-0.462558	-2.06226	-0.393326		2003	1005.89	1018	1005.89	-9423.9	5326.9	0.188833	0.191105	0.188833	-1.76912	-0.240069		2003	-409.701	1047.44	-5236.42	-14043.5	11598.7	-0.035323	0.0903064	-0.451465	-1.21078	-0.321453
2004	10473.9	23256.1	2062.34	-56158.9	30183.8	0.347003	0.770482	0.0683263	-1.86057	-0.134951		2004	308.827	835.34	308.827	-8948.15	5376.55	0.0574395	0.155367	0.0574395	-1.66429	-0.278809		2004	-276.876	3144.43	-5846.02	-13104.4	14641	-0.018911	0.214769	-0.399292	-0.895052	-0.219697
2005	7275.18	15877	-1281.53	-76438.1	42427	0.171475	0.374218	-0.0302055	-1.80164	-0.25723		2005	911.803	375.783	911.803	-8705.53	5245.71	0.173819	0.0716364	0.173819	-1.65955	-0.248056		2005	-125.258	-2029.23	-3478.24	-14220.5	13642.7	-0.00918131	-0.148741	-0.254952	-1.04235	-0.291046
2006	11728.1	13716	4492.27	-98211	51609.3	0.227248	0.265767	0.0870437	-1.90297	-0.264582		2006	1171.78	1174.86	1171.78	-9355.89	5375.03	0.218005	0.218577	0.218005	-1.74062	-0.217207		2006	272.45	-1719.68	-4031.44	-20461	13265.6	0.0205381	-0.129635	-0.303903	-1.54241	-0.391082
2007	23514.2	27925.3	15535.6	-112742	63304.9	0.371444	0.441124	0.245409	-1.78093	-0.144592		2007	664.099	1880.49	664.099	-9867.08	6247.92	0.106291	0.300979	0.106291	-1.57926	-0.213139		2007	2483.07	2160.25	-2486.93	-12780.9	12090.3	0.205376	0.178676	-0.205695	-1.05712	-0.175753
2008	29179	38242.2	21210.5	-144511	80055.3	0.364486	0.477697	0.264948	-1.80514	-0.139601		2008	413.305	383.165	413.305	-10707.6	6534.87	0.0632461	0.0586339	0.0632461	-1.63853	-0.290681		2008	-1663.41	3132.79	-7244.5	-23363.6	16442.9	-0.101163	0.190525	-0.440585	-1.42089	-0.354423
2009	22688.7	14779	14717.3	-159137	75869.8	0.299048	0.194794	0.193981	-2.0975	-0.281935		2009	5638.14	2369.11	5638.14	-6986.41	5259.32	1.07203	0.450459	1.07203	-1.32839	0.253226		2009	-154.262	-1530.87	-5343.68	-20070.2	16167.5	-0.00954147	-0.0946881	-0.33052	-1.24139	-0.335229
2010	36252.2	38539.9	29186.3	-156699	80874.8	0.448251	0.476538	0.360883	-1.93755	-0.130376		2010	3286.3	3271.45	3338.13	-9293.67	4103.98	0.800757	0.79714	0.813387	-2.26455	0.0293473		2010	-160.062	-2538.66	-7683.92	-23134.6	15066.7	-0.0106235	-0.168494	-0.509992	-1.53547	-0.444917
2011	40408.2	40659.6	28429.4	-185918	95604	0.422663	0.425292	0.297366	-1.94466	-0.159868		2011	2751.7	2670.81	2751.7	-8893.58	3752.81	0.733238	0.711682	0.733238	-2.36985	-0.038338		2011	-336.015	-1554.6	-3396.86	-14729.9	10972.2	-0.0306242	-0.141685	-0.309587	-1.34247	-0.364873
2012	43002.6	37058.6	27470.6	-198410	102876	0.418004	0.360226	0.267026	-1.92864	-0.176676		2012	3084.67	3108.76	3099.71	-8704.9	3848.34	0.801558	0.807818	0.805467	-2.26199	0.0305713		2012	-13.6397	-820.452	-3558.71	-16257.9	10614.5	-0.00128501	-0.0772957	-0.33527	-1.53167	-0.389105
2013	28960		24417.4	-180641	102299	0.283092		0.238687	-1.76582	-0.31101		2013	556.794		3375.56	-8146.36	5304.46	0.104967		0.636362	-1.53576	-0.198607		2013	2320.6		-560.058	-14468.8	12002.6	0.193341		-0.0466612	-1.20547	-0.150042
2014	41496.9		37477	-186986	109956	0.377397		0.340837	-1.70056	-0.245582		2014	-2395.95		3226.56	-10741.9	6588.88	-0.363636		0.489698	-1.63031	-0.376063		2014	-305.36		-1584.34	-20767	14623.1	-0.020882		-0.108345	-1.42015	-0.387344
2015	45374			-217349	146550	0.309615			-1.48311	-0.391165		2015	3674.68			-10218.1	6791.47	0.541073			-1.50454	-0.321157		2015	2740.91			-22017.7	15729.5	0.174253			-1.39978	-0.408508
MEAN ABS DIF	18937.5	14612.2	11437	97718	57117.8	0.295413	0.317912	0.214193	1.62681	0.230644		MEAN ABS DIF	1640.91	1465.23	1614	13960.9	7373.12	0.286818	0.246455	0.290348	1.86833	0.293614		MEAN ABS DIF	775.329	1268.27	4532.93	18505.3	13355.7	0.057819	0.09463	0.340648	1.38422	0.359566
DESV EST	15158.3	15654.8	13767.5	71013.5	38569.8	0.0902598	0.364717	0.273628	0.35865	0.11695		DESV EST	1933.52	1951.8	1813.96	7047.78	3051.72	0.366895	0.352787	0.356686	0.346191	0.206241		DESV EST	1139.16	1703.2	1854.7	3782.28	1748.6	0.084893	0.122636	0.126106	0.208704	0.0849211
	Energy	Energy	Energy	Energy	Energy	Energy	Energy	Energy	Energy	Energy			Energy	Energy	Energy	Energy	Energy	Energy	Energy	Energy	Energy	Energy			Energy	Energy	Energy	Energy	Energy	Energy	Energy	Energy	Energy	Energy
SO2	Industry	Industry	Industry	Industry	Industry	Industry	Industry	Industry	Industry	Industry		SO2	Transport	Industry	Industry	Industry	Industry	Industry	Industry	Industry	Industry	Industry		SO2	fugitve	Industry	Industry	Industry	Industry	Industry	Industry	Industry	Industry	Industry
t	own energy	own energy	own energy	own energy	own energy	own energy	own energy	own energy	own energy	own energy		t	R+RR+Nav	R+RR+Nav	R+RR+Nav	R+RR+Nav	R+RR+Nav	R+RR+Nav	R+RR+Nav	R+RR+Nav	R+RR+Nav	R+RR+Nav		t	fuels prod	R+RR+Nav	R+RR+Nav	R+RR+Nav	R+RR+Nav	R+RR+Nav	R+RR+Nav	R+RR+Nav	R+RR+Nav	R+RR+Nav
	1A2	1A2	1A2	1A2	1A2	1A2	1A2	1A2	1A2	1A2			1A3bc	1A3bc	1A3bc	1A3bc	1A3bc	1A3bc	1A3bc	1A3bc	1A3bc	1A3bc			1B1-1B2	1B1-1B2	1B1-1B2	1B1-1B2	1B1-1B2	1B1-1B2	1B1-1B2	1B1-1B2	1B1-1B2	1B1-1B2
year	GEAA-TCNA2019	GEAA-TCNA2015	GEAA-CEDS	GEAA-EDGAR	AVERAGE	GEAA-TCNA2019	GEAA-TCNA2015	GEAA-CEDS	GEAA-EDGAR	GEAA-AVERAGE		year	GEAA-TCNA2019	GEAA-TCNA2015	GEAA-CEDS	GEAA-EDGAR	AVERAGE	GEAA-TCNA2019	GEAA-TCNA2015	GEAA-CEDS	GEAA-EDGAR	GEAA-AVERAGE		year	GEAA-TCNA2019	GEAA-TCNA2015	GEAA-CEDS	GEAA-EDGAR	AVERAGE	GEAA-TCNA2019	GEAA-TCNA2015	GEAA-CEDS	GEAA-EDGAR	GEAA-AVERAGE
1995	-1069.76	-2764.99	-1069.76	-53162.9	17128.4	-0.0624555	-0.161427	-0.0624555	-3.10379	-0.678026		1995	4071.03	4604.97	3677.54	-22972.7	16349.7	0.248998	0.281656	0.224931	-1.40509	-0.1299		1995	-201.011	-891.175	-201.011	20839.6	16954.6	-0.0118558	-0.0525624	-0.0118558	1.22914	0.230573
1996	-1794.05	-2086.89	-1794.05	-62312.1	18095.2	-0.0991451	-0.115329	-0.0991451	-3.44357	-0.751438		1996	3292.14	4549.02	-1535.06	-25680.1	18578.6	0.177201	0.244853	-0.0826252	-1.38224	-0.208562		1996	-1297.6	-231.993	-1297.6	20794.7	17239.4	-0.0752694	-0.0134571	-0.0752694	1.20623	0.208447
1997	-178.383	433.101	-178.383	-91241	24957.9	-0.00714738	0.0173533	-0.00714738	-3.6558	-0.730549		1997	3301.65	4026.79	-562.067	-23238.9	18733	0.176248	0.214957	-0.0300041	-1.24053	-0.175866		1997	-2168.7	-49.7629	-2168.7	22059.3	18546.3	-0.116934	-0.00268317	-0.116934	1.18942	0.190573
1998	405.168	-1128.53	405.168	-91193.9	24077.2	0.0168279	-0.0468712	0.0168279	-3.78756	-0.760156		1998	3292.64	4200.32	-963.635	-20840.3	19199.3	0.171497	0.218774	-0.0501911	-1.08547	-0.149078		1998	-2961.83	-1989.91	-2961.83	22245.7	19393.1	-0.152726	-0.102609	-0.152726	1.14709	0.147807
1999	-192.71	-445.048	-192.71	-87787.7	22648.2	-0.00850885	-0.0196505	-0.00850885	-3.87615	-0.782563		1999	3427.96	2769.86	1135.12	-15048.4	17357.5	0.197492	0.159578	0.0653966	-0.866969	-0.0889006		1999	-363.623	51.6025	-363.623	25262.5	20355.6	-0.0178635	0.00253505	-0.0178635	1.24106	0.241573
2000	-1279.29	-802.048	-404.166	-83619.7	21536.3	-0.0594018	-0.0372418	-0.0187668	-3.88274	-0.79963		2000	3329.21	3258.94	487.34	-11941.4	16618.5	0.200332	0.196103	0.0293251	-0.718559	-0.0585599		2000	-1860.01	-3340.68	-2596.18	22287.9	19397.7	-0.0958881	-0.172221	-0.13384	1.14899	0.149409
2001	-895.704	-1210.34	-895.704	-94376.9	23859.9	-0.0375401	-0.0507268	-0.0375401	-3.95546	-0.816253		2001	3983.78	2754.15	1403.66	-6983.33	14838.6	0.268473	0.185607	0.0945947	-0.470618	0.0156114		2001	-1144	-1141.37	-1144	23006.3	19099.2	-0.0598979	-0.0597599	-0.0598979	1.20457	0.205003
2002	-698.403	-66.6222	-698.403	-86415.7	22789.1	-0.0306464	-0.00292342	-0.0306464	-3.79198	-0.771239		2002	2952.63	2047.66	871.903	-3222.97	12604.3	0.234256	0.162457	0.069175	-0.255704	0.0420367		2002	-1704.08	-2640.46	-1704.08	21509.8	18425.9	-0.0924831	-0.143302	-0.0924831	1.16737	0.16782
2003	-1228.01	-941.032	-1228.01	-89935.4	23637.1	-0.0519526	-0.0398116	-0.0519526	-3.80484	-0.789711		2003	4298.6	4209.73	2804.68	-42.0215	12137.1	0.354172	0.346849	0.231084	-0.00346225	0.185729		2003	-2069.39	-1065.76	-2069.39	22148.9	18767.5	-0.110264	-0.0567872	-0.110264	1.18017	0.180571
2004	-1973.61	-845.696	-1973.61	-108048	27921.1	-0.0706852	-0.0302887	-0.0706852	-3.86976	-0.808284		2004	5630	6326.66	3303.43	1238.19	13119.7	0.429127	0.482227	0.251793	0.0943768	0.251505		2004	-3757.75	-3034.48	-3757.75	21185.3	19064.3	-0.19711	-0.159171	-0.19711	1.11126	0.111574
2005	1071.99	-1154.02	1071.99	-90028.7	23980.3	0.0447031	-0.0481239	0.0447031	-3.75428	-0.7426		2005	4485.79	4964.48	2998.49	4058.39	12452.4	0.360236	0.398678	0.240797	0.325913	0.265125		2005	-6058.72	-6210.87	-6058.72	18733.1	18657.2	-0.324738	-0.332893	-0.324738	1.00407	0.00433919
2006	50.8182	1043.82	50.8182	-99708	25856.9	0.00196537	0.0403692	0.00196537	-3.85615	-0.762371		2006	5433.78	6079.77	1438.29	2138.41	14329.7	0.379196	0.424277	0.100371	0.149229	0.210615		2006	-7484.6	-6142.79	-7484.6	18649.7	19146.6	-0.39091	-0.32083	-0.39091	0.974046	-0.0257209
2007	1688.39	2526.51	1688.39	-99155.4	27270.5	0.0619127	0.0926464	0.0619127	-3.636	-0.683905		2007	5876.06	4684.3	2876.64	5595.36	12791.8	0.45936	0.366194	0.224881	0.437417	0.29757		2007	-7250.08	-5773.76	-7250.08	20361.1	20347.5	-0.356312	-0.283757	-0.356312	1.00067	0.000856827
2008	44.2772	838.513	44.2772	-99416.4	27468	0.00161195	0.0305269	0.00161195	-3.61935	-0.717119		2008	7296.77	6719.85	-5135.58	-2791.59	16224.2	0.449746	0.414187	-0.316538	-0.172063	0.0750662		2008	-5401.06	-6438.76	-5401.06	21172.9	20389.9	-0.264889	-0.315782	-0.264889	1.0384	0.0385688
2009	-1672.9	-2762.92	-1672.9	-97682.9	25721.3	-0.0650394	-0.107418	-0.0650394	-3.79774	-0.807048		2009	5810.07	5736.04	-1611.78	1257.77	13642.9	0.425867	0.42044	-0.11814	0.0921922	0.164072		2009	-4564.4	-6792.66	-4564.4	19780.8	19012.8	-0.24007	-0.357267	-0.24007	1.04039	0.0405974
2010	-714.254	-1085.18	-338.76	-90869.2	24152.2	-0.0295731	-0.0449308	-0.0140261	-3.76236	-0.770178		2010	11384.7	13658.1	8680.37	2049.62	16302.1	0.698354	0.837808	0.532468	0.125727	0.438872		2010	-620.738	-318.064	-141.96	24027.7	19441.6	-0.0319283	-0.01636	-0.00730185	1.23589	0.23606
2011	1232.37	-13.6991	1232.37	-80093.4	21779.7	0.0565836	-0.000628985	0.0565836	-3.67743	-0.712978		2011	12267.6	10578.6	3883.16	-692.963	21337.8	0.574922	0.495767	0.181985	-0.0324759	0.244039		2011	-431.263	-1160.06	-431.263	23488.4	19198.5	-0.0224634	-0.0604243	-0.0224634	1.22345	0.22362
2012	-1114.12	-1140.78	-1488.57	-88640.7	22354.9	-0.0498379	-0.0510302	-0.0665879	-3.96515	-0.826522		2012	11115.6	8677.72	1722.12	-208.835	21126	0.526157	0.410759	0.0815164	-0.00988518	0.20171		2012	-718.151	8.77965	-165.893	23928.1	19321.2	-0.0371691	0.000454406	-0.00858607	1.23844	0.238628
2013	784.706		1289.22	-76417.2	24462.6	0.0320778		0.0527018	-3.12384	-0.759765		2013	10343.6		6302.7	3344.5	18190.8	0.568618		0.346477	0.183857	0.305034		2013	-90.5538		-208.375	24197.8	19511.7	-0.00464099		-0.0106794	1.24017	0.240377
2014	-1212.19		-552.952	-86207.3	25972.8	-0.0466716		-0.0212897	-3.31913	-0.846774		2014	9488.53		10600.8	2669.15	17676.6	0.536786		0.599712	0.151	0.321874		2014	-69.527		-544.771	23861.1	14443.1	-0.00481387		-0.0377186	1.65208	0.652387
2015	-1379.23			-82751.4	31999.3	-0.0431019			-2.58604	-0.876381		2015	9581.51			3215.6	19834	0.483086			0.162126	0.21507		2015	838.071			24054.4	15760.8	0.0531744			1.52622	0.526464
MEAN ABS DIF	984.778	1013.8	870.01	87574.5	24174.7	0.0417804	0.0446332	0.0376237	3.63186	0.771119		MEAN ABS DIF	6222.08	4754.61	2952.11	7582.4	16354.5	0.377149	0.298151	0.184381	0.445948	0.192609		MEAN ABS DIF	2431.2	2251.57	2405.49	22076	18689.3	0.126733	0.116803	0.125329	1.19043	0.193379
DESV EST	1051.31	1317.54	1071.75	12418.3	3256.89	0.044682	0.0593777	0.04624	0.342886	0.0508005		DESV EST	3141.79	2921.36	3584.82	10319.9	2903.48	0.156621	0.166427	0.214471	0.58966	0.189281		DESV EST	2473.83	2540.39	2438.38	1846.06	1479.08	0.127161	0.130324	0.124188	0.160001	0.160033
	Industry	Industry	Industry	Industry	Industry	Industry	Industry	Industry	Industry	Industry
SO2	manufacture	manufacture	manufacture	manufacture	manufacture	manufacture	manufacture	manufacture	manufacture	manufacture
t	Production	Production	Production	Production	Production	Production	Production	Production	Production	Production
	2A-2H	2A-2H	2A-2H	2A-2H	2A-2H	2A-2H	2A-2H	2A-2H	2A-2H	2A-2H
year	GEAA-TCNA2019	GEAA-TCNA2015	GEAA-CEDS	GEAA-EDGAR	AVERAGE	GEAA-TCNA2019	GEAA-TCNA2015	GEAA-CEDS	GEAA-EDGAR	GEAA-AVERAGE
1995			-43169.3	-3323.16	24525.5			-1.76018	-0.135498	-0.690117
1996			-43590.6	-2914.92	24592.4			-1.77252	-0.118529	-0.693745
1997			-46455.7	-3537.58	24669.1			-1.88316	-0.143401	-0.673964
1998			-44492.8	-1511.11	24667.1			-1.80373	-0.0612602	-0.660721
1999			-45782.5	-652.408	24719.7			-1.85207	-0.0263923	-0.643347
2000			-49535.3	-918.09	24744.2			-2.0019	-0.0371033	-0.623058
2001			-47359.7	-1670.19	24658.4			-1.92063	-0.067733	-0.675526
2002			-47074.4	-1675.96	24678.9			-1.90747	-0.0679105	-0.66232
2003			-48072.9	-1824.22	24685.5			-1.94741	-0.0738982	-0.661908
2004			-42079	183.459	24663.6			-1.70612	0.00743845	-0.577177
2005			-43644.7	-162.689	24685.5			-1.76803	-0.00659048	-0.568742
2006			-48602.1	337.169	24635.8			-1.97282	0.0136861	-0.554016
2007			-48315.7	1181.19	24399.7			-1.98017	0.04841	-0.524965
2008			-53643	-3399.86	24088.7			-2.22689	-0.141139	-0.673985
2009			-44415.9	1054.88	23755.3			-1.86973	0.044406	-0.510746
2010			-49742.3	2242.35	23438.8			-2.12222	0.0956681	-0.44354
2011			-47754.9	7014.16	22580.3			-2.11489	0.310632	-0.222648
2012			-43233.3	7345.46	20976.7			-2.06102	0.350173	-0.148368
2013			-40593.1	8674.24	18934.3			-2.14389	0.458124	0.0312006
2014			-42257.5	7784.66	15565.2			-2.71488	0.500134	0.152834
2015			16738.2	6459.02	9620.95			1.73977	0.67135	0.739769
MEAN ABS DIF			44597.8	3041.27	22823.1			1.96521	0.160927	0.530128
DESV EST			14045.7	4025.8	3817.39			0.840124	0.235787	0.365535

## Sheet: VAR_CH4
	Energy	Energy	Energy	Energy	Energy	Energy	Energy	Energy	Energy	Energy			Energy	Energy	Energy	Energy	Energy	Energy	Energy	Energy	Energy	Energy			Energy	Energy	Energy	Energy	Energy	Energy	Energy	Energy	Energy	Energy
CH4	Thermal	Thermal	Thermal	Thermal	Thermal	Thermal	Thermal	Thermal	Thermal	Thermal		CH4	transforamation	transforamation	transforamation	transforamation	transforamation	transforamation	transforamation	transforamation	transforamation	transforamation		CH4	Residential	Residential	Residential	Residential	Residential	Residential	Residential	Residential	Residential	Residential
t	power plants	power plants	power plants	power plants	power plants	power plants	power plants	power plants	power plants	power plants		t	Refinery	Refinery	Refinery	Refinery	Refinery	Refinery	Refinery	Refinery	Refinery	Refinery		t	RCAO	RCAO	RCAO	RCAO	RCAO	RCAO	RCAO	RCAO	RCAO	RCAO
	1A1a	1A1a	1A1a	1A1a	1A1a	1A1a	1A1a	1A1a	1A1a	1A1a			1A1bc	1A1bc	1A1bc	1A1bc	1A1bc	1A1bc	1A1bc	1A1bc	1A1bc	1A1bc			1A4abc	1A4abc	1A4abc	1A4abc	1A4abc	1A4abc	1A4abc	1A4abc	1A4abc	1A4abc
year	GEAA-TCNA2019	GEAA-TCNA2015	GEAA-CEDS	GEAA-EDGAR	AVERAGE	GEAA-TCNA2019	GEAA-TCNA2015	GEAA-CEDS	GEAA-EDGAR	GEAA-AVERAGE		year	GEAA-TCNA2019	GEAA-TCNA2015	GEAA-CEDS	GEAA-EDGAR	AVERAGE	GEAA-TCNA2019	GEAA-TCNA2015	GEAA-CEDS	GEAA-EDGAR	GEAA-AVERAGE		year	GEAA-TCNA2019	GEAA-TCNA2015	GEAA-CEDS	GEAA-EDGAR	AVERAGE	GEAA-TCNA2019	GEAA-TCNA2015	GEAA-CEDS	GEAA-EDGAR	GEAA-AVERAGE
1995	26.6681	2.32781	-191.498	-353.46	459.695	0.0580125	0.00506381	-0.416576	-0.768902	-0.22448		1995	71.6146	37.8096	-299.943	-251.293	326.419	0.219394	0.115831	-0.918887	-0.769846	-0.270702		1995	-4737.07	-441.031	-3873.49	-3766	5050.03	-0.938028	-0.0873323	-0.767023	-0.745738	-0.507624
1996	26.6278	0.362414	-479.519	-504.777	610.942	0.0435849	0.000593205	-0.784884	-0.826226	-0.313386		1996	62.1165	44.4961	-267.128	-293.576	330.691	0.187839	0.134555	-0.807787	-0.887767	-0.274632		1996	-5188.96	-375.785	-4479.84	-4204.54	5439.99	-0.953856	-0.0690783	-0.823502	-0.772895	-0.523866
1997	32.8899	27.934	-472.156	-489.009	568.912	0.0578118	0.0491007	-0.829927	-0.85955	-0.316513		1997	100.599	48.4621	-241.751	-318.426	389.472	0.258295	0.12443	-0.620715	-0.817585	-0.211115		1997	-5863.07	-412.094	-4314.43	-4224.22	4988.33	-1.17536	-0.0826116	-0.864904	-0.846821	-0.593939
1998	-3.45108	-15.2495	-571.694	-600.886	649.562	-0.00531293	-0.0234766	-0.880122	-0.925063	-0.366795		1998	60.5125	40.1544	-246.782	-372.681	378.978	0.159673	0.105955	-0.651177	-0.983385	-0.273787		1998	-7103.23	-496.315	-4672.44	-4563.84	5424.73	-1.30942	-0.0914912	-0.861321	-0.841302	-0.620706
1999	6.64703	-8.08793	-582.059	-608.333	736.307	0.00902753	-0.0109844	-0.790512	-0.826194	-0.323733		1999	26.6581	-5.89471	-296.267	-453.566	387.547	0.0687868	-0.0152103	-0.764468	-1.17035	-0.376249		1999	-5074.36	-587.61	-4952.69	-4839.23	5778.09	-0.878207	-0.101696	-0.85715	-0.837513	-0.534913
2000	27.5043	-0.226171	-583.226	-609.248	729.813	0.0376867	-0.000309903	-0.799145	-0.8348	-0.319314		2000	-2.24924	-28.9364	-313.201	-483.693	383.415	-0.00586632	-0.0754702	-0.81687	-1.26154	-0.431949		2000	-4429.92	-531.655	-4751.33	-4761.64	5303.58	-0.83527	-0.100245	-0.895872	-0.897816	-0.54584
2001	47.1169	36.2408	-557.939	-563.056	591.588	0.0796447	0.0612602	-0.943121	-0.951769	-0.350797		2001	-2.4559	-46.4507	-306.304	-482.232	378.185	-0.00649392	-0.122825	-0.809931	-1.27512	-0.442875		2001	-5362.73	-454.78	-4054.28	-4062.13	5172.51	-1.03678	-0.0879226	-0.783813	-0.78533	-0.538768
2002	49.1349	36.895	-680.769	-683.181	584.815	0.0840179	0.0630883	-1.16408	-1.1682	-0.437034		2002	-5.80615	-14.2637	-317.609	-498.779	389.682	-0.0148997	-0.0366035	-0.815046	-1.27996	-0.429302		2002	-4524.15	-332.082	-3762.79	-3762.85	4953.58	-0.913308	-0.0670388	-0.759611	-0.759622	-0.499916
2003	43.5079	18.1532	-837.055	-841.616	696.347	0.0624801	0.0260691	-1.20207	-1.20862	-0.464427		2003	20.3582	20.0935	-282.692	-459.794	400.715	0.0508046	0.0501442	-0.705469	-1.14744	-0.350391		2003	-5276.48	-380.05	-4403.04	-4403.08	5569.49	-0.947391	-0.0682378	-0.790565	-0.790572	-0.519353
2004	-0.680623	-21.2997	-838.981	-1084.9	870.192	-0.000782153	-0.024477	-0.964134	-1.24674	-0.447226		2004	-27.0853	-21.5384	-523.172	-524.049	433.997	-0.0624088	-0.049628	-1.20547	-1.20749	-0.505001		2004	-7188.66	-353.102	-3563.68	-3578.78	5943.17	-1.20957	-0.059413	-0.599626	-0.602168	-0.494155
2005	-0.71142	-29.601	-809.621	-1058.79	910.124	-0.000781674	-0.0325241	-0.889572	-1.16335	-0.417246		2005	-26.7755	-40.3132	-540.428	-541.719	431.419	-0.0620638	-0.0934433	-1.25268	-1.25567	-0.53277		2005	-5099.73	-441.171	-3043.16	-3102.04	6274.06	-0.812828	-0.0703167	-0.485038	-0.494423	-0.372521
2006	-35.2239	-64.8202	-881.468	-1036.5	972.135	-0.0362335	-0.0666782	-0.906734	-1.06621	-0.415172		2006	-23.3629	-20.9121	-531.73	-533.346	435.14	-0.0536905	-0.0480582	-1.22197	-1.22569	-0.509882		2006	-6272.45	-240.015	-2451.88	-5937.87	5908.56	-1.06159	-0.0406216	-0.414971	-1.00496	-0.504428
2007	-3.52063	-68.2244	-925.481	-1087.06	1111.38	-0.00316781	-0.0613873	-0.832734	-0.978121	-0.375082		2007	-35.2208	-29.125	-537.795	-538.701	457.374	-0.0770065	-0.0636788	-1.17583	-1.17781	-0.498866		2007	-6648.43	66.6006	-1483.84	-5988.31	5946.95	-1.11796	0.0111991	-0.249513	-1.00695	-0.472644
2008	22.6355	224.554	-564.146	-777.294	1304.7	0.0173491	0.172111	-0.432394	-0.595763	-0.167739		2008	-63.9142	-50.0033	-598.317	-602.325	484.595	-0.131892	-0.103186	-1.23468	-1.24294	-0.54254		2008	-6367.84	-216.821	-1254.53	-4283.46	5560	-1.1453	-0.0389967	-0.225636	-0.770407	-0.436067
2009	334.385	583.706	-211.64	-430.09	1300.63	0.257093	0.448785	-0.162721	-0.330677	0.0424962		2009	-46.6641	25.3889	-561.053	-598.772	503.63	-0.0926554	0.0504119	-1.11402	-1.18891	-0.469035		2009	-6034.61	-348.911	-1359.4	-4526.45	5442.47	-1.1088	-0.064109	-0.249777	-0.83169	-0.450875
2010	-57.088	120.845	-452.729	-780.764	1629.39	-0.0350365	0.0741659	-0.277852	-0.479177	-0.14358		2010	-66.3263	2.79254	-595.623	-608.127	494.912	-0.134017	0.0056425	-1.20349	-1.22876	-0.512125		2010	-4015	-453.513	-1372.28	-4447.3	4958.61	-0.809703	-0.0914597	-0.276747	-0.896885	-0.414959
2011	-527.28	549.792	-432.187	-684.352	1784.67	-0.295449	0.308063	-0.242166	-0.38346	-0.122602		2011	-66.8176	-8.6913	-617.455	-597.33	486.469	-0.137352	-0.0178661	-1.26926	-1.22789	-0.530474		2011	-4936.34	-494.166	-1376.48	-4843.46	5142.65	-0.959882	-0.0960917	-0.26766	-0.941822	-0.453091
2012	-551.321	201.572	-569.356	-768.597	2007.15	-0.274678	0.100427	-0.283664	-0.382929	-0.168169		2012	-52.4108	0.728311	-607.799	-578.504	494.59	-0.105968	0.00147256	-1.2289	-1.16966	-0.500611		2012	-4354.09	-658.099	-1375.17	-5660.43	5221.26	-0.833916	-0.126042	-0.26338	-1.08411	-0.46149
2013	-493.44		-274.933	-730.775	2123.96	-0.232321		-0.129444	-0.344063	-0.176457		2013	-53.2487		-616.351	-555.069	553.605	-0.0961854		-1.11334	-1.00264	-0.553043		2013	-5019.36		-1337.13	-5409.91	5761.53	-0.871184		-0.232079	-0.93897	-0.510558
2014	-660.296		-329.763	-595.714	2085.14	-0.316668		-0.158149	-0.285695	-0.190128		2014	-58.2063		-627.723	-624.05	572.53	-0.101665		-1.0964	-1.08999	-0.572013		2014	-4345.04		-728.485	-5741.48	6116.33	-0.710399		-0.119105	-0.938713	-0.442054
2015	-814.794			-612.618	2251.69	-0.361858			-0.27207	-0.211309		2015	-64.4136			-628.605	484.01	-0.133083			-1.29875	-0.477276		2015	-4000.92			-5476.59	6787.83	-0.589425			-0.806825	-0.465417
MEAN ABS DIF	179.282	95.7091	535.534	709.573	1141.86	0.108048	0.0727888	0.623333	0.757028	0.285414		MEAN ABS DIF	44.6103	23.1454	425.196	502.126	437.97	0.102859	0.0578291	0.953638	1.13853	0.441173		MEAN ABS DIF	5325.83	346.848	2790.97	4646.84	5559.23	0.962769	0.0644716	0.513681	0.837883	0.493485
DESV EST	295.555	191.22	218.009	214.014	598.26	0.159604	0.132185	0.351437	0.332204	0.132343		DESV EST	51.1718	32.0773	152.961	110.758	67.795	0.124026	0.0819331	0.229173	0.15579	0.107115		DESV EST	967.106	159.745	1494.38	809.467	484.814	0.17621	0.0304255	0.282843	0.133866	0.0580788
	Energy	Energy	Energy	Energy	Energy	Energy	Energy	Energy	Energy	Energy			Energy	Energy	Energy	Energy	Energy	Energy	Energy	Energy	Energy	Energy			Energy	Energy	Energy	Energy	Energy	Energy	Energy	Energy	Energy	Energy
CH4	Industry	Industry	Industry	Industry	Industry	Industry	Industry	Industry	Industry	Industry		CH4	Transport	Industry	Industry	Industry	Industry	Industry	Industry	Industry	Industry	Industry		CH4	fugitve	Industry	Industry	Industry	Industry	Industry	Industry	Industry	Industry	Industry
t	own energy	own energy	own energy	own energy	own energy	own energy	own energy	own energy	own energy	own energy		t	R+RR+Nav	R+RR+Nav	R+RR+Nav	R+RR+Nav	R+RR+Nav	R+RR+Nav	R+RR+Nav	R+RR+Nav	R+RR+Nav	R+RR+Nav		t	fuels prod	R+RR+Nav	R+RR+Nav	R+RR+Nav	R+RR+Nav	R+RR+Nav	R+RR+Nav	R+RR+Nav	R+RR+Nav	R+RR+Nav
	1A2	1A2	1A2	1A2	1A2	1A2	1A2	1A2	1A2	1A2			1A3bc	1A3bc	1A3bc	1A3bc	1A3bc	1A3bc	1A3bc	1A3bc	1A3bc	1A3bc			1B1-1B2	1B1-1B2	1B1-1B2	1B1-1B2	1B1-1B2	1B1-1B2	1B1-1B2	1B1-1B2	1B1-1B2	1B1-1B2
year	GEAA-TCNA2019	GEAA-TCNA2015	GEAA-CEDS	GEAA-EDGAR	AVERAGE	GEAA-TCNA2019	GEAA-TCNA2015	GEAA-CEDS	GEAA-EDGAR	GEAA-AVERAGE		year	GEAA-TCNA2019	GEAA-TCNA2015	GEAA-CEDS	GEAA-EDGAR	AVERAGE	GEAA-TCNA2019	GEAA-TCNA2015	GEAA-CEDS	GEAA-EDGAR	GEAA-AVERAGE		year	GEAA-TCNA2019	GEAA-TCNA2015	GEAA-CEDS	GEAA-EDGAR	AVERAGE	GEAA-TCNA2019	GEAA-TCNA2015	GEAA-CEDS	GEAA-EDGAR	GEAA-AVERAGE
1995	2221.6	93.9873	164.241	-136.349	2355.54	0.943137	0.0399004	0.0697253	-0.0578842	0.198976		1995	-273.715	-97.5437	106.253	145.968	9513.87	-0.0287701	-0.0102528	0.0111683	0.0153427	-0.00250239		1995	49004.8	16190.1	-824267	-862637	598613	0.0818639	0.0270459	-1.37696	-1.44106	-0.541822
1996	2280.6	138.75	228.475	-89.13	2346.74	0.971816	0.0591245	0.0973586	-0.0379804	0.218064		1996	-2320.59	-180.927	-2.9409	51.1574	10073.7	-0.230362	-0.0179603	-0.000291939	0.00507832	-0.0487071		1996	25586.7	-4166.53	-929941	-1.18603e+06	698806	0.0366149	-0.00596236	-1.33076	-1.69722	-0.599466
1997	2548.04	152.004	273.866	-247.892	2598.66	0.980521	0.058493	0.105387	-0.0953923	0.209802		1997	-1731.38	-271.309	-118.906	-60.3388	10228.1	-0.169277	-0.0265259	-0.0116255	-0.00589932	-0.0426655		1997	35374.4	9564.07	-986951	-728688	639783	0.0552913	0.0149489	-1.54263	-1.13896	-0.522271
1998	2915.52	451.343	-93.2629	-249.202	2961.86	0.984357	0.152385	-0.031488	-0.0841371	0.204223		1998	-2111.89	-338.97	-153.284	-143.729	10666.8	-0.197988	-0.0317782	-0.0143703	-0.0134745	-0.0515222		1998	41557.7	17669.4	-1.00631e+06	-555346	622694	0.0667386	0.0283757	-1.61606	-0.891845	-0.482557
1999	2891.99	403.626	-50.3091	-218.019	2914.23	0.992369	0.138501	-0.0172632	-0.0748118	0.207759		1999	-1524.25	-363.682	-224.997	-193.688	10384.1	-0.146787	-0.035023	-0.0216675	-0.0186524	-0.0444259		1999	49341.1	9510.61	-947228	-516784	616364	0.0800518	0.0154302	-1.5368	-0.83844	-0.455952
2000	2713.43	205.046	-96.6276	-239.254	2826.85	0.959878	0.0725351	-0.0341821	-0.084636	0.182719		2000	-1255.41	-406.68	-212.629	-180.821	10352.4	-0.121268	-0.0392837	-0.0205391	-0.0174666	-0.0397114		2000	-5370.96	-37210.1	-957519	-542155	610677	-0.0087951	-0.0609326	-1.56796	-0.887794	-0.505097
2001	2546.99	56.7853	-462.576	-619.372	2853.06	0.892724	0.0199033	-0.162133	-0.217091	0.106681		2001	-1737.85	-449.997	-264.612	-220.059	10224.3	-0.169972	-0.0440124	-0.0258807	-0.0215231	-0.0522777		2001	16215.1	2978.83	-1.02488e+06	-518423	644218	0.0251702	0.00462395	-1.59089	-0.804733	-0.473166
2002	2595.58	492.318	-95.486	-248.454	2705.72	0.959291	0.181954	-0.0352904	-0.0918254	0.202826		2002	-1051.34	-480.5	176.378	210.676	10423.5	-0.100863	-0.0460978	0.0169212	0.0202117	-0.0219656		2002	6244.99	-6890.61	-1.04236e+06	-536191	633783	0.00985351	-0.0108722	-1.64466	-0.846016	-0.498338
2003	2304.72	216.799	-486.846	-666.679	2799.56	0.823243	0.0774404	-0.173901	-0.238138	0.0977289		2003	-1524.46	-636.837	2102.56	-441.768	11334.7	-0.134495	-0.0561846	0.185498	-0.0389747	-0.00883124		2003	-1553.83	-18948.9	-1.03289e+06	-573634	659294	-0.00235682	-0.0287412	-1.56666	-0.870074	-0.493567
2004	2083.58	-39.7735	607.049	647.432	2307.39	0.903001	-0.0172374	0.263089	0.28059	0.285889		2004	-731.283	-766.034	5510.72	437.617	12549.7	-0.058271	-0.06104	0.439112	0.0348708	0.0709343		2004	911.538	-25380.3	-985940	-588187	658903	0.00138342	-0.0385189	-1.49634	-0.892676	-0.485229
2005	2113.8	-39.8414	720.772	763.957	2339.04	0.903705	-0.0170333	0.308149	0.326612	0.304287		2005	-1166.94	-1387.61	5860.28	-279.287	12624.8	-0.0924319	-0.109911	0.464187	-0.022122	0.0479443		2005	3106.56	-30809.7	-969519	-594581	652185	0.00476331	-0.0472407	-1.48657	-0.911676	-0.488145
2006	2400.73	-118.408	473.713	559.156	2720.67	0.882404	-0.0435214	0.174116	0.205521	0.243704		2006	-1233.15	-498.094	6899.47	133.256	12587.2	-0.0979686	-0.0395715	0.548135	0.0105866	0.0842363		2006	10499	-26348.5	-954491	-577198	653892	0.0160561	-0.0402948	-1.45971	-0.882712	-0.473332
2007	2414.73	-426.399	617.751	646.368	2787.26	0.866345	-0.152981	0.221634	0.231901	0.23338		2007	-1171.21	1702.84	7018.03	695.64	12369.2	-0.0946882	0.137668	0.567381	0.0562398	0.13332		2007	35677	-9631.82	-907440	-533015	648818	0.0549877	-0.0148452	-1.39861	-0.821517	-0.435996
2008	2234.89	-422.704	333.164	760.849	2681.92	0.833317	-0.157612	0.124226	0.283695	0.216725		2008	-1693.37	-816.954	7376.14	963.576	13175.4	-0.128525	-0.0620058	0.55984	0.0731342	0.0884887		2008	25536.3	-25964.8	-888041	-552135	640483	0.0398703	-0.0405394	-1.38652	-0.86206	-0.449849
2009	2459.27	-236.388	560.598	981.757	2691.04	0.913875	-0.0878427	0.208321	0.364825	0.279836		2009	-1444.46	-1360.77	7273.2	719.576	12661	-0.114087	-0.107477	0.574456	0.0568339	0.0819451		2009	21743.5	-28155.4	-818781	-555318	611541	0.0355553	-0.04604	-1.33888	-0.908062	-0.451485
2010	2138.55	75.8566	903.704	1315.89	2590.31	0.825597	0.0292847	0.348878	0.508005	0.342353		2010	-2492.1	-1316.33	6927.22	394.184	13135.4	-0.189724	-0.100213	0.52737	0.0300093	0.0534885		2010	52423.8	3713.26	-791166	-509207	606321	0.0864621	0.00612425	-1.30486	-0.83983	-0.410422
2011	1883.29	-114.433	774.251	1067.06	2513	0.74942	-0.0455362	0.308098	0.424616	0.28732		2011	-2754.33	-1525.22	6877.66	158.819	14034.2	-0.196259	-0.108679	0.490066	0.0113166	0.0392889		2011	60559.6	-2528.45	-722604	-509421	589776	0.102682	-0.00428714	-1.22522	-0.863752	-0.398115
2012	1696.75	-380.878	519.01	972.192	2504.62	0.677447	-0.15207	0.207221	0.38816	0.224151		2012	-2652.26	-1412.92	7411.85	339.402	14375	-0.184505	-0.0982899	0.515607	0.0236106	0.0512845		2012	85638.6	16501.9	-710697	-494096	592655	0.1445	0.027844	-1.19917	-0.833698	-0.372106
2013	1334.38		518.7	818.673	2089.24	0.638689		0.248272	0.391852	0.319703		2013	-2438.15		8018.79	1106.21	14089.4	-0.173049		0.569136	0.0785138	0.11865		2013	102596		-700522	-466387	640667	0.160139		-1.09343	-0.727971	-0.415314
2014	1134.3		115.143	195.604	1977.29	0.573665		0.0582329	0.0989256	0.182706		2014	-2250.4		8603.72	1156.84	14117.7	-0.159403		0.609428	0.0819423	0.132992		2014	104851		-698878	-482287	643583	0.162917		-1.08592	-0.749379	-0.418095
2015	1246.41			437.771	1864.95	0.668335			0.234736	0.301024		2015	-2032.9			1482.59	17104.4	-0.118852			0.086679	-0.0107245		2015	111524			-475739	509983	0.218682			-0.932853	-0.238057
MEAN ABS DIF	2198.06	193.588	385.502	565.765	2544.24	0.854435	0.0715884	0.152236	0.224825	0.230945		MEAN ABS DIF	1694.83	667.296	3863.79	453.105	12191.7	0.138454	0.0539035	0.293937	0.0344039	0.0583765		MEAN ABS DIF	40253.1	13912.5	852401	588450	627288	0.0664159	0.0220318	1.34517	0.935349	0.457542
DESV EST	499.891	280.296	397.064	598.064	306.499	0.124677	0.102563	0.154047	0.233064	0.0636798		DESV EST	658.065	741.649	3617.04	533.045	1928.85	0.0503307	0.0566708	0.271437	0.0384549	0.064568		DESV EST	36129.5	18191.7	118195	163422	37634.2	0.0625097	0.0290279	0.16813	0.228791	0.0723215
	Industry	Industry	Industry	Industry	Industry	Industry	Industry	Industry	Industry	Industry
CH4	manufacture	manufacture	manufacture	manufacture	manufacture	manufacture	manufacture	manufacture	manufacture	manufacture
t	Production	Production	Production	Production	Production	Production	Production	Production	Production	Production
	2A-2H	2A-2H	2A-2H	2A-2H	2A-2H	2A-2H	2A-2H	2A-2H	2A-2H	2A-2H
year	GEAA-TCNA2019	GEAA-TCNA2015	GEAA-CEDS	GEAA-EDGAR	AVERAGE	GEAA-TCNA2019	GEAA-TCNA2015	GEAA-CEDS	GEAA-EDGAR	GEAA-AVERAGE
1995	-1934.78		-219.418	-234.977	1675.55	-1.15472		-0.130953	-0.140239	-0.84627
1996	-1968.33		-129.465	-156.348	1714.63	-1.14796		-0.0755063	-0.0911851	-0.831138
1997	-1714.85		-161.891	-191.883	1757.7	-0.97562		-0.0921034	-0.109167	-0.844053
1998	-1694.57		-118.321	-156.876	1808.57	-0.936965		-0.0654226	-0.0867401	-0.848677
1999	-1836.19		-69.4585	-118.182	1866.48	-0.983771		-0.0372135	-0.0633181	-0.849856
2000	-1725.97		-64.9033	-125.747	1930.03	-0.894273		-0.0336281	-0.065153	-0.844512
2001	-3597.5		-66.9664	-117.909	2001.95	-1.79699		-0.0334505	-0.058897	-0.826153
2002	-4174.14		-386.804	-420.306	2049.18	-2.03699		-0.188761	-0.20511	-0.823736
2003	-5344.29		-414.255	-1152.3	2080.79	-2.56839		-0.199085	-0.553779	-0.834801
2004	-5380.68		-591.737	-1094.7	2081.51	-2.58499		-0.284282	-0.525914	-0.818755
2005	-5365.61		-776.058	-963.373	2076.3	-2.58421		-0.373769	-0.463985	-0.789558
2006	-5371.99		-975.167	-902.655	2063.86	-2.60289		-0.472497	-0.437363	-0.789795
2007	-4809.67		-996.67	-913.388	2045.61	-2.35121		-0.487223	-0.446511	-0.794521
2008	-4827.86		-1007.01	-946.317	2039.54	-2.36713		-0.493744	-0.463985	-0.795547
2009	-4987.33		-1076.86	-835.541	2030.45	-2.45627		-0.530355	-0.411506	-0.821794
2010	-4638.44		-1085.97	-1003.43	2022.4	-2.29353		-0.536971	-0.49616	-0.818193
2011	-4716.53		-1084.6	-1017.93	2017.86	-2.33739		-0.5375	-0.504462	-0.809542
2012	-4855.74		-1120.58	-1035.85	2003.62	-2.42349		-0.559281	-0.516989	-0.818411
2013	-4868.7		-1119.73	-910.703	1975.3	-2.46479		-0.566868	-0.461045	-0.807468
2014	-5103.34		-1108.19	-995.094	1932.04	-2.64143		-0.573587	-0.515049	-0.789119
2015	-5147.18		379.464	-1139.25	1793.51	-2.86989		0.211576	-0.635205	-0.788424
MEAN ABS DIF	4003.03		616.835	687.274	1950.8	2.02252		0.308751	0.345322	0.818587
DESV EST	1478.05		483.022	410.648	128.981	0.689458		0.240497	0.202497	0.0215059

## Sheet: VAR_NOX
	Energy	Energy	Energy	Energy	Energy	Energy	Energy	Energy	Energy	Energy			Energy	Energy	Energy	Energy	Energy	Energy	Energy	Energy	Energy	Energy			Energy	Energy	Energy	Energy	Energy	Energy	Energy	Energy	Energy	Energy
NOX	Thermal	Thermal	Thermal	Thermal	Thermal	Thermal	Thermal	Thermal	Thermal	Thermal		NOX	transforamation	transforamation	transforamation	transforamation	transforamation	transforamation	transforamation	transforamation	transforamation	transforamation		NOX	Residential	Residential	Residential	Residential	Residential	Residential	Residential	Residential	Residential	Residential
t	power plants	power plants	power plants	power plants	power plants	power plants	power plants	power plants	power plants	power plants		t	Refinery	Refinery	Refinery	Refinery	Refinery	Refinery	Refinery	Refinery	Refinery	Refinery		t	RCAO	RCAO	RCAO	RCAO	RCAO	RCAO	RCAO	RCAO	RCAO	RCAO
	1A1a	1A1a	1A1a	1A1a	1A1a	1A1a	1A1a	1A1a	1A1a	1A1a			1A1bc	1A1bc	1A1bc	1A1bc	1A1bc	1A1bc	1A1bc	1A1bc	1A1bc	1A1bc			1A4abc	1A4abc	1A4abc	1A4abc	1A4abc	1A4abc	1A4abc	1A4abc	1A4abc	1A4abc
year	GEAA-TCNA2019	GEAA-TCNA2015	GEAA-CEDS	GEAA-EDGAR	AVERAGE	GEAA-TCNA2019	GEAA-TCNA2015	GEAA-CEDS	GEAA-EDGAR	GEAA-AVERAGE		year	GEAA-TCNA2019	GEAA-TCNA2015	GEAA-CEDS	GEAA-EDGAR	AVERAGE	GEAA-TCNA2019	GEAA-TCNA2015	GEAA-CEDS	GEAA-EDGAR	GEAA-AVERAGE		year	GEAA-TCNA2019	GEAA-TCNA2015	GEAA-CEDS	GEAA-EDGAR	AVERAGE	GEAA-TCNA2019	GEAA-TCNA2015	GEAA-CEDS	GEAA-EDGAR	GEAA-AVERAGE
1995	9909.39	9909.39	1933.13	3107.08	53703.7	0.18452	0.18452	0.0359962	0.0578559	0.0925783		1995	386.485	386.485	386.485	11989.1	21709.7	0.0178025	0.0178025	0.0178025	0.552246	0.121131		1995	-1865.98	-1865.98	-28623	143746	150212	-0.0124223	-0.0124223	-0.19055	0.95695	0.148311
1996	9042.71	9042.71	-277.089	5497.99	61140.4	0.147901	0.147901	-0.00453201	0.089924	0.0762387		1996	1163.55	1163.55	1163.55	13611.2	21707.8	0.0536004	0.0536004	0.0536004	0.627016	0.157563		1996	-1426.89	-1426.89	-27261.4	151247	156391	-0.0091239	-0.0091239	-0.174316	0.96711	0.154909
1997	8889.35	8889.35	-107.679	5847.88	55018.5	0.16157	0.16157	-0.00195713	0.106289	0.0854946		1997	2849.55	2849.55	2849.55	18302.7	27728.4	0.102767	0.102767	0.102767	0.660071	0.193674		1997	-2200.03	-2200.03	-29450	148486	154238	-0.0142639	-0.0142639	-0.190938	0.962706	0.148648
1998	6646.07	6646.07	-2811.46	2389.19	59805.4	0.111128	0.111128	-0.0470101	0.0399494	0.0430392		1998	6211.55	6211.55	6211.55	24310.7	27887.6	0.222735	0.222735	0.222735	0.871739	0.307989		1998	-2566.63	-2566.63	-27070.6	142638	149418	-0.0171776	-0.0171776	-0.181174	0.954626	0.147819
1999	7470.46	7470.46	-1227.31	9333.42	71096.7	0.105075	0.105075	-0.0172626	0.131278	0.0648329		1999	-3193.56	-3193.56	-3193.56	14916.6	27238	-0.117246	-0.117246	-0.117246	0.54764	0.0391803		1999	-2148.59	-2148.59	-24098.9	147292	154591	-0.0138986	-0.0138986	-0.155888	0.952787	0.15382
2000	3570.03	-16430	-2117.53	11251.3	76202.5	0.0468492	-0.215609	-0.0277881	0.14765	-0.00977955		2000	-6712.41	-6712.41	-5224.95	12298.3	26242.4	-0.255784	-0.255784	-0.199103	0.468641	-0.0484063		2000	-2302.7	-2302.7	-26923.3	145329	154428	-0.0149111	-0.0149111	-0.174342	0.941078	0.147383
2001	7163.94	7163.94	-2703.67	9374.96	53619.1	0.133608	0.133608	-0.0504236	0.174843	0.0783271		2001	-6786.45	-6786.45	-6786.45	12465.1	27424.4	-0.24746	-0.24746	-0.24746	0.454526	-0.057571		2001	-1876.29	-1876.29	-23477	137591	145877	-0.0128622	-0.0128622	-0.160937	0.9432	0.151308
2002	5727.54	5727.54	-4672.84	7227.01	45854.7	0.124906	0.124906	-0.101905	0.157607	0.0611027		2002	-1320.33	-1320.33	-1320.33	22070.7	27318.8	-0.0483306	-0.0483306	-0.0483306	0.807896	0.132581		2002	-657.965	-657.965	-21830.6	138131	144388	-0.00455691	-0.00455691	-0.151193	0.95666	0.15927
2003	3441.19	3441.19	-7335.2	7418.93	53479.9	0.0643456	0.0643456	-0.137158	0.138724	0.0260513		2003	1844.5	1844.5	1844.5	25985.8	28459.1	0.0648125	0.0648125	0.0648125	0.913092	0.221506		2003	-2254.36	-2254.36	-25670.7	158393	164459	-0.0137077	-0.0137077	-0.156092	0.963117	0.155922
2004	4737.02	4737.02	-8434.13	5678.54	70421.1	0.067267	0.067267	-0.119767	0.0806369	0.0190808		2004	-2929.26	-2929.26	-2929.26	21028.8	27073.2	-0.108198	-0.108198	-0.108198	0.776737	0.0904289		2004	-4293.32	-4293.32	-31073.5	243701	237077	-0.0181094	-0.0181094	-0.131069	1.02794	0.172131
2005	4492.11	4492.11	-9623.12	7787.81	77012.6	0.0583295	0.0583295	-0.124955	0.101124	0.0185656		2005	-6147.44	-6147.44	-6147.44	19042.3	27268.8	-0.225439	-0.225439	-0.225439	0.698318	0.00440041		2005	-2580.72	-2580.72	-25693.8	247090	240268	-0.010741	-0.010741	-0.106938	1.02839	0.179995
2006	5521.36	5521.36	-8809.75	8104.54	82968.3	0.0665479	0.0665479	-0.106182	0.0976825	0.0249192		2006	-3618.57	-3618.57	-3618.57	20042.3	26831.1	-0.134865	-0.134865	-0.134865	0.746979	0.0684769		2006	-6474.46	-6474.46	-36658.8	185664	196707	-0.0329142	-0.0329142	-0.186362	0.943862	0.138334
2007	18745.7	18745.7	616.805	13105.2	98489.2	0.190333	0.190333	0.00626267	0.133062	0.103998		2007	-5504.49	-5504.49	-5504.49	20748.1	28980.3	-0.189939	-0.189939	-0.189939	0.715937	0.0292239		2007	-3192.01	-3192.01	-35641	176732	189054	-0.0168841	-0.0168841	-0.188523	0.934824	0.142507
2008	21331.3	21331.3	1155.53	18193.1	109479	0.194843	0.194843	0.0105548	0.166178	0.113284		2008	-7924.06	-7924.06	-7924.06	19407	30108	-0.263188	-0.263188	-0.263188	0.644582	-0.0289967		2008	-63342.4	-63342.4	-94520.1	181090	231834	-0.273223	-0.273223	-0.407705	0.781119	-0.0346064
2009	27407.3	27407.3	6726.83	17865.2	104659	0.261873	0.261873	0.064274	0.1707	0.151744		2009	-2244.81	-2244.81	-2244.81	24664.5	30280	-0.0741351	-0.0741351	-0.0741351	0.814549	0.118429		2009	-3308.3	-3308.3	-32609.3	228794	232800	-0.0142109	-0.0142109	-0.140074	0.98279	0.162859
2010	40307.7	4894.39	24119.5	23775.3	121523	0.331688	0.0402754	0.198477	0.195644	0.153217		2010	-2843.93	-2843.93	-3242.72	23256.9	29555.7	-0.0962225	-0.0962225	-0.109715	0.786881	0.0969442		2010	-2040.49	-2040.49	-40880.7	193987	206602	-0.00987643	-0.00987643	-0.197871	0.938938	0.144263
2011	43899.7	49521.3	28686.1	31858.8	130030	0.337612	0.380845	0.220611	0.245011	0.236816		2011	-4507.53	-4507.53	-4507.53	21767.6	28994.8	-0.15546	-0.15546	-0.15546	0.750743	0.0568724		2011	-1122.35	-1122.35	-28926.9	172175	183864	-0.00610422	-0.00610422	-0.157327	0.936424	0.153378
2012	41036.3	-4672.27	17212.5	25591.8	147358	0.27848	-0.0317069	0.116807	0.17367	0.10745		2012	-3939.05	-3939.05	-2984.01	23147.4	30081.2	-0.130947	-0.130947	-0.0991984	0.769499	0.0816812		2012	-132.889	-132.889	-32256.8	173567	187515	-0.000708686	-0.000708686	-0.172023	0.925616	0.150435
2013	62317.6		51547	48379.8	143400	0.434572		0.359463	0.337377	0.282853		2013	-7301.87		-3558.87	23909.5	29075.1	-0.251138		-0.122403	0.822334	0.112198		2013	30981.5		6688.5	230708	207900	0.149021		0.0321717	1.1097	0.322724
2014	42632		32855.6	33416.4	136852	0.311519		0.240081	0.244179	0.198945		2014	-10779.2		-4247.13	20981.4	30533	-0.353035		-0.1391	0.687171	0.048759		2014	-14406.3		-7233.51	212178	210129	-0.0685593		-0.0344241	1.00975	0.226692
2015	51029.8			39364	149361	0.341654			0.263549	0.201735		2015	-6129.17			21510	27473.1	-0.223098			0.78295	0.186618		2015	47139.3			218800	176508	0.267066			1.23961	0.502224
MEAN ABS DIF	20253.3	10287.8	10141.6	15931.8	90546.4	0.188315	0.120985	0.0948318	0.154902	0.102383		MEAN ABS DIF	4492.28	3339.41	3613.8	19783.6	27712.9	0.158867	0.119473	0.128357	0.709502	0.104887		MEAN ABS DIF	9348.26	4942.21	28885.2	179873	184489	0.046683	0.0236046	0.156663	0.974152	0.176073
DESV EST	18741.9	13665.8	16455.9	13001.6	35466.6	0.113971	0.123602	0.137118	0.0728812	0.0779864		DESV EST	4084.91	3777.61	3516.89	4326.27	2357.37	0.14365	0.135643	0.125541	0.124881	0.0909764		DESV EST	19306.5	14437.1	18414.5	36887.8	33013.2	0.0936781	0.0616797	0.080795	0.0850168	0.096159
	Energy	Energy	Energy	Energy	Energy	Energy	Energy	Energy	Energy	Energy			Energy	Energy	Energy	Energy	Energy	Energy	Energy	Energy	Energy	Energy			Energy	Energy	Energy	Energy	Energy	Energy	Energy	Energy	Energy	Energy
NOX	Industry	Industry	Industry	Industry	Industry	Industry	Industry	Industry	Industry	Industry		NOX	Transport	Industry	Industry	Industry	Industry	Industry	Industry	Industry	Industry	Industry		NOX	fugitve	Industry	Industry	Industry	Industry	Industry	Industry	Industry	Industry	Industry
t	own energy	own energy	own energy	own energy	own energy	own energy	own energy	own energy	own energy	own energy		t	R+RR+Nav	R+RR+Nav	R+RR+Nav	R+RR+Nav	R+RR+Nav	R+RR+Nav	R+RR+Nav	R+RR+Nav	R+RR+Nav	R+RR+Nav		t	fuels prod	R+RR+Nav	R+RR+Nav	R+RR+Nav	R+RR+Nav	R+RR+Nav	R+RR+Nav	R+RR+Nav	R+RR+Nav	R+RR+Nav
	1A2	1A2	1A2	1A2	1A2	1A2	1A2	1A2	1A2	1A2			1A3bc	1A3bc	1A3bc	1A3bc	1A3bc	1A3bc	1A3bc	1A3bc	1A3bc	1A3bc			1B1-1B2	1B1-1B2	1B1-1B2	1B1-1B2	1B1-1B2	1B1-1B2	1B1-1B2	1B1-1B2	1B1-1B2	1B1-1B2
year	GEAA-TCNA2019	GEAA-TCNA2015	GEAA-CEDS	GEAA-EDGAR	AVERAGE	GEAA-TCNA2019	GEAA-TCNA2015	GEAA-CEDS	GEAA-EDGAR	GEAA-AVERAGE		year	GEAA-TCNA2019	GEAA-TCNA2015	GEAA-CEDS	GEAA-EDGAR	AVERAGE	GEAA-TCNA2019	GEAA-TCNA2015	GEAA-CEDS	GEAA-EDGAR	GEAA-AVERAGE		year	GEAA-TCNA2019	GEAA-TCNA2015	GEAA-CEDS	GEAA-EDGAR	AVERAGE	GEAA-TCNA2019	GEAA-TCNA2015	GEAA-CEDS	GEAA-EDGAR	GEAA-AVERAGE
1995	-483.265	-483.265	-483.265	-39784.4	64511	-0.00749121	-0.00749121	-0.00749121	-0.616707	-0.127836		1995	-18224.7	-18224.7	-8530.49	-7357.88	347484	-0.0524475	-0.0524475	-0.0245493	-0.0211747	-0.0301238		1995	356.822	356.822	255.042	-1037.53	1687.15	0.211494	0.211494	0.151167	-0.614957	-0.0081603
1996	-2223.66	-2223.66	-2223.66	-47055.7	64989.3	-0.0342158	-0.0342158	-0.0342158	-0.724052	-0.16534		1996	-35986.1	-35986.1	-21013.8	-26498.5	359188	-0.100187	-0.100187	-0.0585036	-0.0737733	-0.0665303		1996	270.815	270.815	166.855	-2553.55	2022.99	0.133869	0.133869	0.0824795	-1.26227	-0.18241
1997	-70.0823	-70.0823	-70.0823	-68764.8	76865.4	-0.000911754	-0.000911754	-0.000911754	-0.894613	-0.17947		1997	-54754.4	-54754.4	-40534	-46751.9	370746	-0.147687	-0.147687	-0.109331	-0.126102	-0.106162		1997	224.052	224.052	144.042	-641.242	1749.47	0.128069	0.128069	0.0823347	-0.366536	-0.00561276
1998	2507.85	2507.85	2507.85	-77530.5	77702.4	0.032275	0.032275	0.032275	-0.997787	-0.180192		1998	-69618.2	-69618.2	-54648.1	-61542.8	386409	-0.180167	-0.180167	-0.141426	-0.159269	-0.132206		1998	198.957	198.957	117.317	211.139	1630.02	0.122058	0.122058	0.0719728	0.129531	0.089124
1999	1377.84	1377.84	1377.84	-81325.9	74489.9	0.018497	0.018497	0.018497	-1.09177	-0.207256		1999	-70359.8	-70359.8	-58463.8	-59566	369184	-0.190582	-0.190582	-0.158359	-0.161345	-0.140173		1999	398.803	398.803	303.283	780.606	1624.8	0.245448	0.245448	0.186659	0.480433	0.231598
2000	-1130.79	-1130.79	2319.27	-75375.5	71839.5	-0.0157406	-0.0157406	0.0322841	-1.04922	-0.209683		2000	-41223.2	-41223.2	-54037.9	-36141.3	337351	-0.122197	-0.122197	-0.160183	-0.107133	-0.102342		2000	453.801	453.801	400.361	1020.57	1497.85	0.302969	0.302969	0.267291	0.681355	0.310917
2001	-2852.79	-2852.79	-2852.79	-87305.5	73768.1	-0.0386724	-0.0386724	-0.0386724	-1.18351	-0.259906		2001	-65426.8	-65426.8	-56178.2	-23749	315755	-0.207208	-0.207208	-0.177917	-0.0752133	-0.133509		2001	324.649	324.649	242.739	864.74	1483.21	0.218883	0.218883	0.163658	0.583019	0.236889
2002	4448.78	4448.78	4448.78	-73784.8	71306.9	0.0623892	0.0623892	0.0623892	-1.03475	-0.169517		2002	-60886.9	-60886.9	-54847.8	-7593.39	302578	-0.201227	-0.201227	-0.181268	-0.0250957	-0.121764		2002	377.539	377.539	294.259	855.964	1447.87	0.260755	0.260755	0.203236	0.591189	0.263187
2003	-462.572	-462.572	-462.572	-83519.2	77456.5	-0.00597202	-0.00597202	-0.00597202	-1.07827	-0.219238		2003	-63920.2	-63920.2	-57049.1	-14495.1	300488	-0.212721	-0.212721	-0.189854	-0.0482385	-0.132707		2003	367.295	367.295	281.025	986.217	1481.05	0.247997	0.247997	0.189747	0.665891	0.270326
2004	-3372.11	-3372.11	-3372.11	-79955.3	80636	-0.0418189	-0.0418189	-0.0418189	-0.991558	-0.223403		2004	-54527.1	-54527.1	-46270.3	18736.2	342780	-0.159073	-0.159073	-0.134985	0.0546595	-0.0796944		2004	187.76	187.76	96.5905	1013.2	1450.02	0.129488	0.129488	0.0666131	0.69875	0.204868
2005	488.624	488.624	488.624	-67299.9	78583.3	0.00621792	0.00621792	0.00621792	-0.856416	-0.167552		2005	-65054.8	-65054.8	-56187.1	7959.46	352557	-0.184523	-0.184523	-0.15937	0.0225764	-0.101168		2005	-59.5303	-59.5303	-202.68	799.251	1394.78	-0.0426807	-0.0426807	-0.145313	0.573029	0.0684709
2006	-3962.71	-3962.71	-3962.71	-76905.9	87264.3	-0.0454104	-0.0454104	-0.0454104	-0.881298	-0.203506		2006	-48793.2	-48793.2	-38377.5	15162.6	366090	-0.133282	-0.133282	-0.104831	0.0414177	-0.0659955		2006	-173.125	-173.125	-268.915	885.081	1406.57	-0.123083	-0.123083	-0.191185	0.629247	0.0383792
2007	-4717.87	-4717.87	-4717.87	-72542.3	92493.8	-0.0510074	-0.0510074	-0.0510074	-0.784294	-0.187463		2007	28792.9	28792.9	34997.3	43663.6	341864	0.0842234	0.0842234	0.102372	0.127722	0.0797082		2007	-70.5928	-70.5928	-160.943	1147.98	1486.18	-0.0474994	-0.0474994	-0.108293	0.772436	0.113829
2008	2573.35	2573.35	2573.35	-73498.4	86412.9	0.0297797	0.0297797	0.0297797	-0.850549	-0.152242		2008	3127.53	3127.53	9056.61	40112	383901	0.00814671	0.00814671	0.023591	0.104485	0.0288739		2008	276.49	276.49	182.87	1478.08	1494.79	0.184969	0.184969	0.122338	0.98882	0.296219
2009	-4824.22	-4824.22	-4824.22	-76833.7	82332.8	-0.0585941	-0.0585941	-0.0585941	-0.933209	-0.221798		2009	-15277.8	-13628.3	-7793.5	57106.7	369311	-0.0413683	-0.036902	-0.0211028	0.15463	0.0110514		2009	446.863	446.863	347.263	1452.84	1429.92	0.312509	0.312509	0.242855	1.01603	0.37678
2010	658.722	658.722	-2064.65	-67211.4	81449.7	0.00808747	0.00808747	-0.0253488	-0.825189	-0.166873		2010	-54019.7	-80789.1	-35687.3	48530.5	429375	-0.12581	-0.188155	-0.0831145	0.113026	-0.0568108		2010	701.909	701.909	570.277	1781.49	1491.53	0.470596	0.470596	0.382343	1.1944	0.503588
2011	-697.523	-697.523	-697.523	-62411.9	83163.9	-0.00838732	-0.00838732	-0.00838732	-0.750469	-0.155126		2011	-82816.3	-118260	-86560.4	24049.1	490795	-0.168739	-0.240957	-0.176368	0.0490003	-0.107413		2011	701.397	701.397	596.077	1742.52	1448.31	0.484287	0.484287	0.411568	1.20314	0.516656
2012	-5178.46	-5178.46	-11557.7	-74511.1	77552.6	-0.0667735	-0.0667735	-0.14903	-0.960782	-0.248672		2012	-63635.4	-35666.7	-62867.7	35741.6	471952	-0.134834	-0.0755726	-0.133208	0.0757314	-0.0535767		2012	629.222	629.222	691.983	1671.57	1445.45	0.435313	0.435313	0.478733	1.15644	0.50116
2013	6127.74		-4865.52	-62285.2	78378.9	0.078181		-0.0620768	-0.794667	-0.194641		2013	-27186.1		-20510	82249.7	455420	-0.0596945		-0.0450354	0.180602	0.018968		2013	669.276		846.145	1646.49	1397.08	0.479051		0.60565	1.17852	0.565805
2014	4394.84		-12265.7	-72485.3	75028.9	0.0585753		-0.16348	-0.966098	-0.267751		2014	-63906.4		-12151.6	80897	459779	-0.138994		-0.0264292	0.175947	0.00263117		2014	706.075		986.183	1591.5	1381.08	0.511248		0.714065	1.15236	0.594418
2015	-12769.6			-68857.7	82241.2	-0.155271			-0.837265	-0.330845		2015	-48381.8			88954.1	468838	-0.103195			0.189733	0.0288459		2015	784.773			1678.09	1415.09	0.554575			1.18585	0.580143
MEAN ABS DIF	3110.64	2001.49	3244.58	70916.4	78022.3	0.0392509	0.0253448	0.0416124	0.909642	0.201824		MEAN ABS DIF	49329.5	44240	38845.8	39374.2	381993	0.131253	0.12025	0.105324	0.099375	0.0762025		MEAN ABS DIF	399.036	296.173	340.707	1230.46	1517.39	0.268897	0.195332	0.231786	0.815438	0.28374
DESV EST	4186.62	2788.16	4328.41	11193.7	6798.29	0.05227	0.035159	0.0563337	0.139074	0.0468683		DESV EST	27245.9	33434.2	28884.5	45860.6	57854.5	0.0755282	0.0865919	0.0794038	0.113707	0.0655517		DESV EST	269.605	244.745	326.079	1070.21	152.539	0.192025	0.169126	0.232836	0.651932	0.222178
	Industry	Industry	Industry	Industry	Industry	Industry	Industry	Industry	Industry	Industry
NOX	manufacture	manufacture	manufacture	manufacture	manufacture	manufacture	manufacture	manufacture	manufacture	manufacture
t	Production	Production	Production	Production	Production	Production	Production	Production	Production	Production
	2A-2H	2A-2H	2A-2H	2A-2H	2A-2H	2A-2H	2A-2H	2A-2H	2A-2H	2A-2H
year	GEAA-TCNA2019	GEAA-TCNA2015	GEAA-CEDS	GEAA-EDGAR	AVERAGE	GEAA-TCNA2019	GEAA-TCNA2015	GEAA-CEDS	GEAA-EDGAR	GEAA-AVERAGE
1995			884.692	1145.25	2542.47			0.347965	0.450448	-0.214676
1996			934.721	1215.7	2599.77			0.359539	0.467616	-0.210485
1997			810.652	1116.07	2661.94			0.304534	0.41927	-0.171648
1998			954.935	1231.85	2718.79			0.351235	0.453087	-0.225771
1999			1234.64	1451.44	2792.03			0.442202	0.519851	-0.163582
2000			495.628	1391.43	2870.04			0.17269	0.484814	-0.130136
2001			1999.62	2135.71	2931.42			0.682134	0.728559	0.250947
2002			2047.3	2191.35	2973.34			0.688551	0.736999	0.283291
2003			2234.24	2402.71	3013.15			0.741497	0.797408	0.395475
2004			3150.63	3345.36	3039.7			1.03649	1.10056	0.700569
2005			3276.46	3504.4	3042.6			1.07686	1.15178	0.71471
2006			3433.75	3738.27	3050.16			1.12576	1.22559	0.808897
2007			2811.24	3186.02	3042.75			0.923913	1.04708	0.611274
2008			2544.99	2729.83	3057.66			0.832334	0.892784	0.552446
2009			2534.83	3104.98	3065.95			0.826769	1.01273	0.556464
2010			2432.53	3051.79	3089.65			0.787315	0.987744	0.537161
2011			2817.94	3296.51	3116.25			0.904272	1.05784	0.655522
2012			2705.37	3132.34	3115.39			0.86839	1.00544	0.627779
2013			2584.67	3166.15	3113.11			0.830254	1.01704	0.598197
2014			2358.89	3142.75	3129.52			0.753755	1.00423	0.525606
2015			4688.6	3027.77	3210.51			1.46039	0.94308	0.460391
MEAN ABS DIF			2235.06	2509.89	2960.77			0.738898	0.833522	0.447382
DESV EST			1047.24	899.789	189.795			0.318495	0.266892	0.365658

## Sheet: VAR_CO2
	Energy	Energy	Energy	Energy	Energy	Energy	Energy	Energy	Energy	Energy			Energy	Energy	Energy	Energy	Energy	Energy	Energy	Energy	Energy	Energy			Energy	Energy	Energy	Energy	Energy	Energy	Energy	Energy	Energy	Energy
CO2	Thermal	Thermal	Thermal	Thermal	Thermal	Thermal	Thermal	Thermal	Thermal	Thermal		CO2	transforamation	transforamation	transforamation	transforamation	transforamation	transforamation	transforamation	transforamation	transforamation	transforamation		CO2	Residential	Residential	Residential	Residential	Residential	Residential	Residential	Residential	Residential	Residential
kt	power plants	power plants	power plants	power plants	power plants	power plants	power plants	power plants	power plants	power plants		kt	Refinery	Refinery	Refinery	Refinery	Refinery	Refinery	Refinery	Refinery	Refinery	Refinery		kt	RCAO	RCAO	RCAO	RCAO	RCAO	RCAO	RCAO	RCAO	RCAO	RCAO
	1A1a	1A1a	1A1a	1A1a	1A1a	1A1a	1A1a	1A1a	1A1a	1A1a			1A1bc	1A1bc	1A1bc	1A1bc	1A1bc	1A1bc	1A1bc	1A1bc	1A1bc	1A1bc			1A4abc	1A4abc	1A4abc	1A4abc	1A4abc	1A4abc	1A4abc	1A4abc	1A4abc	1A4abc
year	GEAA-TCNA2019	GEAA-TCNA2015	GEAA-CEDS	GEAA-EDGAR	AVERAGE	GEAA-TCNA2019	GEAA-TCNA2015	GEAA-CEDS	GEAA-EDGAR	GEAA-AVERAGE		year	GEAA-TCNA2019	GEAA-TCNA2015	GEAA-CEDS	GEAA-EDGAR	AVERAGE	GEAA-TCNA2019	GEAA-TCNA2015	GEAA-CEDS	GEAA-EDGAR	GEAA-AVERAGE		year	GEAA-TCNA2019	GEAA-TCNA2015	GEAA-CEDS	GEAA-EDGAR	AVERAGE	GEAA-TCNA2019	GEAA-TCNA2015	GEAA-CEDS	GEAA-EDGAR	GEAA-AVERAGE
1995	27.9199	-279.605	-3446.06	-5295.88	19352.4	0.00144271	-0.0144481	-0.178069	-0.273655	-0.092946		1995	1965.58	465.291	-2861.22	-2002.3	9825.31	0.200052	0.0473563	-0.291209	-0.20379	-0.049518		1995	1999.24	2191.81	3207.05	3039.87	25675.6	0.0778653	0.0853654	0.124906	0.118395	0.0813064
1996	206.107	-302.338	-3958.55	-5316.89	22469.1	0.00917291	-0.0134557	-0.176177	-0.236631	-0.0834182		1996	1528.43	666.842	-1770.91	-2218.23	9987.86	0.153028	0.0667652	-0.177306	-0.222092	-0.035921		1996	1137.51	2414.66	3299.58	3216.56	26489.7	0.0429416	0.0911544	0.124561	0.121427	0.0760167
1997	17.7505	296.641	-3449.05	-4833.88	20639	0.000860048	0.0143728	-0.167113	-0.234211	-0.0772182		1997	2968.36	1319.61	403.069	-1004.03	11865.7	0.250164	0.111213	0.0339693	-0.0846162	0.0621459		1997	-63.648	1811.3	3076.76	2957.58	26157.2	-0.00243329	0.0692465	0.117626	0.113069	0.0595016
1998	-144.466	-109.218	-4383.5	-5172.16	22451.9	-0.00643447	-0.00486454	-0.195239	-0.230366	-0.0873809		1998	2733.03	2303.58	2069.61	-225.935	12193.6	0.224138	0.188918	0.16973	-0.0185291	0.112851		1998	-837.646	1690	2791.21	2701.37	26218.4	-0.0319488	0.0644587	0.10646	0.103033	0.0484007
1999	-185.958	-365.109	-4184.08	-4783.2	26735.5	-0.00695546	-0.0136564	-0.156499	-0.178908	-0.0712039		1999	-119.981	-947.1	-1017.01	-4011.5	12002.1	-0.0099967	-0.0789112	-0.0847361	-0.334233	-0.101575		1999	348.948	2322.58	3583.39	3427.24	27809.5	0.0125478	0.0835174	0.128855	0.12324	0.069632
2000	142.957	-184.53	-5024.29	-5743.86	26719.9	0.00535021	-0.00690608	-0.188035	-0.214965	-0.0809114		2000	-1727.81	-2274.71	-1983.63	-5186.51	11750.9	-0.147036	-0.193578	-0.168807	-0.441371	-0.190158		2000	1195.63	2173.25	3713.21	3545.56	28416.5	0.0420751	0.0764784	0.130671	0.124771	0.0747991
2001	-169.603	-299.561	-4366.71	-5813.9	20580.4	-0.00824101	-0.0145557	-0.212178	-0.282497	-0.103495		2001	-1395.55	-2357.06	-1590.71	-4921.19	11862.2	-0.117647	-0.198704	-0.134099	-0.414863	-0.173063		2001	-996.716	2318.87	3752.94	3583.57	27556.5	-0.0361699	0.0841495	0.136191	0.130044	0.0628429
2002	-106.958	-373.335	-4788.52	-6425.02	17909.2	-0.00597222	-0.0208459	-0.267377	-0.358755	-0.13059		2002	-328.24	-512.798	293.802	-3116.66	12226.6	-0.0268464	-0.0419412	0.0240297	-0.254909	-0.0599333		2002	-435.552	2497.32	3920.75	3716.92	26511.8	-0.0164286	0.0941967	0.147887	0.140199	0.0731709
2003	-425.866	-1386.6	-6073.99	-7764.02	20855.3	-0.02042	-0.0664865	-0.291245	-0.37228	-0.150086		2003	472.098	662.372	1436.34	-1916.33	12805.4	0.036867	0.0517258	0.112167	-0.14965	0.010222		2003	903.885	2525.8	4389.53	4199.47	28766.1	0.0314219	0.0878049	0.152594	0.145987	0.0835614
2004	-619.045	-1086.18	-7288.02	-8257.51	27199.6	-0.0227593	-0.0399335	-0.267946	-0.303589	-0.126846		2004	-1736.96	-1120.99	-3842.8	-3843.13	13066	-0.132937	-0.0857943	-0.294107	-0.294132	-0.161394		2004	6726.63	2724.85	8933.22	8791.04	32892.8	0.204502	0.0828402	0.271586	0.267263	0.165238
2005	319.295	-786.687	-5718.08	-6161.66	28999.7	0.0110103	-0.0271274	-0.197177	-0.212473	-0.0851534		2005	-1732.06	-2322.85	-4630.79	-4639.87	12834.3	-0.134955	-0.180987	-0.360813	-0.36152	-0.207655		2005	5964.44	3308.99	8113.02	7895.68	34087.6	0.174974	0.0970733	0.238005	0.231629	0.148336
2006	-504.916	-1130.51	-6824.98	-7244.69	31456.4	-0.0160513	-0.035939	-0.216966	-0.230309	-0.0998531		2006	-1632.87	-1368.95	-4039.74	-4099.65	12888.5	-0.126692	-0.106215	-0.313437	-0.318086	-0.172886		2006	3567.92	2184.25	4709.81	4615.82	34425.8	0.103641	0.0634482	0.136811	0.13408	0.087596
2007	-545.113	-599.953	-6610.23	-8050.79	35892.7	-0.0151873	-0.0167152	-0.184166	-0.224301	-0.088074		2007	-2461.14	-2015.85	-4064.08	-4077.87	13659.7	-0.180175	-0.147577	-0.297523	-0.298533	-0.184761		2007	-1391.71	1260.98	4530.77	4237.22	35665.6	-0.039021	0.0353556	0.127035	0.118804	0.0484347
2008	496.767	-219.994	-6049.84	-7551.9	39642.9	0.012531	-0.00554939	-0.152609	-0.190498	-0.067225		2008	-3833.54	-2926.87	-5175.38	-5408	14393.4	-0.26634	-0.203348	-0.359567	-0.375728	-0.240997		2008	527.976	-2247.82	232.795	223.822	37848.1	0.0139499	-0.0593906	0.00615077	0.0059137	-0.00667525
2009	553.195	-235.733	-8735.83	-9905.63	37839.7	0.0146195	-0.00622977	-0.230864	-0.261779	-0.0968507		2009	-3218.34	-766.999	-3594.27	-4371.03	15062	-0.213672	-0.0509227	-0.238631	-0.290202	-0.158686		2009	6143.22	2655.85	5146.42	4979.34	37676	0.163054	0.0704918	0.136597	0.132162	0.100461
2010	450.565	359.99	-5283.96	-9038.28	39194.1	0.0114957	0.00918481	-0.134815	-0.230603	-0.0689476		2010	-3473.88	-1006.84	-4283.63	-4674.51	14839.4	-0.234098	-0.0678489	-0.288665	-0.315006	-0.181124		2010	11544.3	2553.43	4817.77	4328.35	36161.6	0.319241	0.0706116	0.133229	0.119695	0.128555
2011	-1169.58	-15.6119	-4767.76	-9248.08	44081	-0.0265325	-0.000354163	-0.108159	-0.209797	-0.0689687		2011	-3704.9	-1667.94	-5152.97	-5107.04	14581.4	-0.254083	-0.114388	-0.353392	-0.350243	-0.214421		2011	6635.77	2496.79	5214.68	4321.17	34299	0.193469	0.072795	0.152036	0.125985	0.108857
2012	-237.634	21.5624	-6548.06	-10418.9	47298.2	-0.00502417	0.000455882	-0.138442	-0.220282	-0.0726585		2012	-3095.44	-1426.84	-4570.38	-4972.53	15025.8	-0.206009	-0.0949593	-0.30417	-0.330934	-0.187214		2012	7275.64	2399.72	5222.05	4195.99	35855	0.202919	0.0669285	0.145644	0.117027	0.106503
2013	63.8476		-1609.92	-7869.67	46332.1	0.00137804		-0.0347474	-0.169853	-0.0508057		2013	-3156.67		-4808.06	-3625.32	15049.2	-0.209756		-0.319489	-0.240898	-0.192536		2013	11108.7		8338.1	7163.36	38105.4	0.291526		0.218817	0.187988	0.174583
2014	202.948		-1076.11	-9076.02	46533.4	0.00436134		-0.0231256	-0.195043	-0.0534519		2014	-3489.78		-5093.69	-5842.43	15648.7	-0.223008		-0.325503	-0.37335	-0.230466		2014	10610.4		7256.79	4644.62	37636.8	0.281915		0.192811	0.123407	0.149533
2015	202.678			-9122.34	49551.9	0.00409022			-0.184097	-0.0600022		2015	-3989			-5979.32	15574.2	-0.256128			-0.383924	-0.213351		2015	11351.6			4838.82	38802	0.292553			0.124706	0.139086
MEAN ABS DIF	323.484	383.483	4770.84	7290.2	31987.4	0.00999475	0.0148134	0.167664	0.238805	0.0864803		MEAN ABS DIF	2322.08	1244.45	2984.86	3868.73	13197.3	0.171601	0.0967215	0.221493	0.28841	0.149566		MEAN ABS DIF	4322.24	1989.44	4488.09	4315.4	32240.8	0.1226	0.0645384	0.139451	0.133754	0.0949091
DESV EST	421.195	470.799	1845.36	1781.55	10668.3	0.01218	0.0189934	0.068501	0.0540965	0.0253412		DESV EST	2233.19	1426.89	2313.87	1581.94	1721.35	0.16861	0.113521	0.165878	0.106469	0.10024		DESV EST	4514.32	1163.53	2107.17	1846.72	4853.39	0.122189	0.0350734	0.0542713	0.0498986	0.0445711
	Energy	Energy	Energy	Energy	Energy	Energy	Energy	Energy	Energy	Energy			Energy	Energy	Energy	Energy	Energy	Energy	Energy	Energy	Energy	Energy			Energy	Energy	Energy	Energy	Energy	Energy	Energy	Energy	Energy	Energy
CO2	Industry	Industry	Industry	Industry	Industry	Industry	Industry	Industry	Industry	Industry		CO2	Transport	Industry	Industry	Industry	Industry	Industry	Industry	Industry	Industry	Industry		CO2	fugitve	Industry	Industry	Industry	Industry	Industry	Industry	Industry	Industry	Industry
kt	own energy	own energy	own energy	own energy	own energy	own energy	own energy	own energy	own energy	own energy		kt	R+RR+Nav	R+RR+Nav	R+RR+Nav	R+RR+Nav	R+RR+Nav	R+RR+Nav	R+RR+Nav	R+RR+Nav	R+RR+Nav	R+RR+Nav		kt	fuels prod	R+RR+Nav	R+RR+Nav	R+RR+Nav	R+RR+Nav	R+RR+Nav	R+RR+Nav	R+RR+Nav	R+RR+Nav	R+RR+Nav
	1A2	1A2	1A2	1A2	1A2	1A2	1A2	1A2	1A2	1A2			1A3bc	1A3bc	1A3bc	1A3bc	1A3bc	1A3bc	1A3bc	1A3bc	1A3bc	1A3bc			1B1-1B2	1B1-1B2	1B1-1B2	1B1-1B2	1B1-1B2	1B1-1B2	1B1-1B2	1B1-1B2	1B1-1B2	1B1-1B2
year	GEAA-TCNA2019	GEAA-TCNA2015	GEAA-CEDS	GEAA-EDGAR	AVERAGE	GEAA-TCNA2019	GEAA-TCNA2015	GEAA-CEDS	GEAA-EDGAR	GEAA-AVERAGE		year	GEAA-TCNA2019	GEAA-TCNA2015	GEAA-CEDS	GEAA-EDGAR	AVERAGE	GEAA-TCNA2019	GEAA-TCNA2015	GEAA-CEDS	GEAA-EDGAR	GEAA-AVERAGE		year	GEAA-TCNA2019	GEAA-TCNA2015	GEAA-CEDS	GEAA-EDGAR	AVERAGE	GEAA-TCNA2019	GEAA-TCNA2015	GEAA-CEDS	GEAA-EDGAR	GEAA-AVERAGE
1995	5708.88	7116.76	3696.97	6156.43	21714.2	0.26291	0.327747	0.170256	0.283521	0.208887		1995	11268.3	5468.42	5174.47	5484.04	35189	0.320224	0.155401	0.147048	0.155845	0.155704		1995	-659.4	-708.093	593.913	-1808.45	3900.32	-0.169063	-0.181547	0.152273	-0.463667	-0.132401
1996	4881.05	7236.65	1981.31	4524.48	23137.5	0.210958	0.312767	0.0856318	0.195547	0.160981		1996	4855.04	4794.25	4394.36	4789.14	37385.5	0.129864	0.128238	0.117542	0.128101	0.100749		1996	-1027.09	-1051.85	1390.71	-4444.19	4527.2	-0.22687	-0.232341	0.307191	-0.981664	-0.226737
1997	7528.92	8102.28	-2927.52	1851.02	26908.8	0.279794	0.301101	-0.108794	0.0687885	0.108178		1997	6770.1	4363.71	3982.96	4327.18	38037.3	0.177986	0.114722	0.104712	0.113762	0.102236		1997	-945.505	-979.84	1688.35	-801.085	4065.97	-0.232541	-0.240986	0.41524	-0.197022	-0.0510617
1998	7418.25	10842.1	-1097.19	3177.94	27752.9	0.267296	0.390666	-0.0395343	0.114508	0.146587		1998	6891.71	4116.93	3738.31	4079.67	39523.5	0.17437	0.104164	0.0945845	0.103222	0.0952681		1998	-771.962	-795.367	2480.27	854.446	3816.79	-0.202254	-0.208386	0.649831	0.223865	0.0926111
1999	6265.28	10622.7	-1414.83	2516.31	26398.2	0.237338	0.402402	-0.0535959	0.0953213	0.136293		1999	7678.28	4054.34	3740.95	4006.73	37640.9	0.203988	0.107711	0.0993853	0.106446	0.103506		1999	-701.352	-881.897	2350.71	1392.89	3778.64	-0.185609	-0.23339	0.622106	0.368622	0.114346
2000	5391.89	9375.78	-1629.4	1935.07	25994.5	0.207424	0.360683	-0.0626824	0.0744413	0.115973		2000	9997.46	3976.75	3456.08	3701.08	36176.2	0.276355	0.109927	0.0955346	0.102307	0.116825		2000	-1155.18	-1225.91	2474.98	1849.6	3556.28	-0.324829	-0.344716	0.695946	0.520095	0.109299
2001	4728.02	8293.69	-4543.68	95.2129	25956.1	0.182154	0.319527	-0.175052	0.00366822	0.0660596		2001	4233.2	3623.76	2557.18	2762.28	33498.7	0.126369	0.108176	0.0763367	0.0824593	0.0786682		2001	-992.093	-1033.02	2849.62	2234.3	3747.86	-0.264709	-0.275628	0.760333	0.596153	0.16323
2002	7016.95	10530	-687.167	3367.64	25538	0.274765	0.412328	-0.0269077	0.131868	0.158411		2002	5259.69	3178.02	3309.45	3466.76	31651.3	0.166176	0.100407	0.10456	0.10953	0.0961345		2002	-1020.32	-1049.56	2684.91	1870.74	3697.76	-0.275928	-0.283837	0.726092	0.505912	0.134448
2003	4765.35	8585.99	-2990.71	1362.08	27549.7	0.172973	0.311655	-0.108557	0.0494406	0.0851022		2003	4619.09	4186.14	3054.42	3145.5	32097.6	0.143908	0.130419	0.0951604	0.0979981	0.0934971		2003	-1077.08	-1112.08	3079.71	2194.8	3772.64	-0.285496	-0.294775	0.816328	0.581767	0.163565
2004	4086.07	7114.47	-6860.42	-1993.55	29851.4	0.13688	0.238329	-0.229819	-0.0667824	0.0157216		2004	7398.32	4503.05	5714.98	5798.5	35388.7	0.209059	0.127245	0.161491	0.163851	0.132329		2004	-1006.27	-1040.05	3299.67	2778.99	3613.2	-0.278497	-0.287848	0.913226	0.769121	0.223201
2005	3858.67	8359.81	-4920.52	-450.201	29256.1	0.131893	0.285746	-0.168188	-0.0153883	0.0468126		2005	4912.49	2092.59	2701.69	2801.41	36221.2	0.135625	0.0577724	0.0745885	0.0773417	0.0690654		2005	-855.293	-885.9	3478.75	3019.41	3472.36	-0.246315	-0.255129	1.00184	0.869555	0.27399
2006	4868.61	7990.85	-5450.3	-729.643	31721.4	0.15348	0.251908	-0.171818	-0.0230016	0.0421137		2006	5351.3	4526.93	3727.61	3911.21	38311.6	0.139678	0.118161	0.0972973	0.102089	0.0914452		2006	-696.812	-731.35	3754.56	2971.34	3535.01	-0.197117	-0.206888	1.06211	0.840547	0.29973
2007	4981.43	6737.65	-5429.46	-396.313	32386.9	0.15381	0.208036	-0.167643	-0.0122368	0.0363931		2007	6335.73	13880.9	7390.35	7605.38	39045.7	0.162265	0.355503	0.189275	0.194782	0.180365		2007	-271.554	-309.312	4214.68	3461.63	3535.59	-0.0768057	-0.0874852	1.19207	0.979082	0.401373
2008	3881.38	8804.48	-4915.43	-354.389	31489.4	0.12326	0.279602	-0.156098	-0.0112542	0.0471019		2008	7353.98	10317.7	7465.35	7926.49	42483	0.173104	0.242867	0.175726	0.18658	0.155655		2008	-260.476	-447.537	4266.79	2881.3	3629.78	-0.071761	-0.123296	1.1755	0.793796	0.354847
2009	3963.98	8266.57	-3896.75	874.972	29748.4	0.13325	0.277883	-0.13099	0.0294124	0.061911		2009	7353.14	7048.18	8311.45	8740.05	39221.6	0.187477	0.179701	0.21191	0.222838	0.160385		2009	-137.494	-167.16	4234.08	3069.28	3439.83	-0.0399712	-0.0485955	1.2309	0.892275	0.406921
2010	-271.374	10119	-2634.66	1496.99	31252.1	-0.0086834	0.323786	-0.0843037	0.0479006	0.05574		2010	694.777	-1170.85	6498.75	7649.68	44666.3	0.0155548	-0.0262132	0.145495	0.171263	0.06122		2010	99.8428	62.7177	4253.93	3791.1	3306.42	0.0301967	0.0189685	1.28657	1.14659	0.496465
2011	-575.041	8690.57	-1946.04	1541.36	31385.2	-0.0183221	0.2769	-0.0620051	0.0491111	0.0491369		2011	2185.34	-350.681	2806.56	4318.17	48220.6	0.0453197	-0.00727244	0.0582026	0.0895503	0.03716		2011	264.249	231.025	4242.62	3721.21	3214.7	0.0822001	0.0718652	1.31975	1.15756	0.526276
2012	-3877.78	7510.74	-5990.51	-1292.32	29318.2	-0.132265	0.25618	-0.204327	-0.0440792	-0.0248984		2012	3755.61	789.878	3283.71	5080.06	47574.9	0.0789409	0.0166028	0.0690219	0.10678	0.0542692		2012	534.666	503.943	4407.07	2846.01	3417.48	0.15645	0.14746	1.28957	0.83278	0.485251
2013	-6398.84		-5628.42	-1914.24	31448.5	-0.20347		-0.178973	-0.0608691	-0.110828		2013	4856.76		6464.61	10387.2	46841.4	0.103685		0.138011	0.221753	0.115862		2013	747.981		4416.63	2586.45	3156.3	0.236981		1.39931	0.819458	0.613937
2014	-10024.8		-9352.52	-7494.24	30577	-0.327855		-0.305868	-0.245094	-0.219704		2014	5846.67		6139.96	10128.9	45878	0.12744		0.133832	0.220779	0.120513		2014	849.146		4480.24	1181.7	3529.89	0.240558		1.26923	0.334771	0.461139
2015	-10624.6			-7313.27	30049.7	-0.353567			-0.243373	-0.19898		2015	7025.45			11011.7	47792.7	0.146999			0.230405	0.125801		2015	978.93			1205.95	4655.04	0.210295			0.259063	0.156453
MEAN ABS DIF	5291.29	7347.62	3713.99	2420.84	28544.5	0.189159	0.263678	0.128145	0.0888384	0.0998006		MEAN ABS DIF	5935.36	3925.86	4472.06	5767.67	39659.3	0.154495	0.10431	0.113796	0.142271	0.106984		MEAN ABS DIF	716.795	629.362	3078.2	2426.9	3684.24	0.192117	0.168721	0.870734	0.673017	0.280347
DESV EST	5493.8	1273.96	3040.35	3303.24	2958.46	0.192403	0.056419	0.10779	0.122169	0.110216		DESV EST	2368.46	3495.56	1797.19	2623.27	5296.76	0.0680836	0.0870188	0.0420725	0.0523683	0.0367927		DESV EST	702.116	509.908	1144.86	1995.09	373.782	0.18823	0.138473	0.366361	0.531846	0.222976
	Industry	Industry	Industry	Industry	Industry	Industry	Industry	Industry	Industry	Industry
CO	manufacture	manufacture	manufacture	manufacture	manufacture	manufacture	manufacture	manufacture	manufacture	manufacture
t	Production	Production	Production	Production	Production	Production	Production	Production	Production	Production
	2A-2H	2A-2H	2A-2H	2A-2H	2A-2H	2A-2H	2A-2H	2A-2H	2A-2H	2A-2H
year	GEAA-TCNA2019	GEAA-TCNA2015	GEAA-CEDS	GEAA-EDGAR	AVERAGE	GEAA-TCNA2019	GEAA-TCNA2015	GEAA-CEDS	GEAA-EDGAR	GEAA-AVERAGE
1995	-580.218	9087	-4556.22	-18293.3	11249.9	-0.0515754	0.807741	-0.405002	-1.62609	-0.88821
1996	436.726	9636.44	-4687.41	-21224.3	12577.2	0.0347237	0.766185	-0.372692	-1.68752	-0.870259
1997	-1398.14	11012.9	-6193.85	-17685.3	12675.2	-0.110305	0.868854	-0.488661	-1.39527	-0.878779
1998	-566.821	11071.2	-6487.51	-19174.7	13431.3	-0.0422015	0.824281	-0.483014	-1.42761	-0.87039
1999	169.126	10428.5	-6648.21	-22966.8	14322.3	0.0118086	0.728127	-0.464185	-1.60357	-0.872226
2000	1550.94	10110.9	-6630.9	-23670.9	14676.4	0.105676	0.688924	-0.451808	-1.61286	-0.862321
2001	962.27	10434.4	-6982.07	-17282.2	13269.4	0.0725181	0.786353	-0.526179	-1.30242	-0.868252
2002	2049.21	10190.7	-6379.62	-15615.9	12701.4	0.161337	0.802329	-0.502275	-1.22946	-0.860871
2003	-81.1784	11886.2	-7255.67	-18233.6	14109	-0.00575366	0.842453	-0.514258	-1.29233	-0.868335
2004	254.897	13165.3	-7830.26	-24176.7	16605.7	0.01535	0.792818	-0.471542	-1.45593	-0.852455
2005	-44.2257	14217.3	-8634.17	-24057.8	17429.1	-0.00253746	0.81572	-0.495388	-1.38032	-0.845567
2006	677.892	14815.3	-9405.22	-26154.8	18818.4	0.0360227	0.787276	-0.499787	-1.38985	-0.833433
2007	227.229	15377.8	-10129.3	-30653	20473.6	0.0110986	0.751103	-0.494748	-1.4972	-0.835238
2008	-112.151	15292.4	-10317.5	-34212.2	21330	-0.0052579	0.716943	-0.48371	-1.60395	-0.842304
2009	-484.697	13195.1	-10212.9	-33867.6	20049.7	-0.0241748	0.658118	-0.509378	-1.68918	-0.870151
2010	-621.955	15319.4	-10790.8	-34739.3	21584.4	-0.028815	0.709745	-0.499933	-1.60946	-0.852914
2011	-673.435	16544.1	-11432.1	-38856.8	23533.9	-0.0286155	0.70299	-0.48577	-1.6511	-0.842605
2012	192.021	15253.5	-11019.9	-43260.6	23999.9	0.00800092	0.635567	-0.459165	-1.80254	-0.84576
2013	-262.831	16362.7	-11662.4	-40185.5	23993.2	-0.0109544	0.681972	-0.48607	-1.67487	-0.836923
2014	-8.42431	16437.6	-12144	-40978.1	24533.2	-0.000343384	0.670015	-0.495003	-1.67031	-0.831711
2015	-1619.96	16338.1	0	-55701	28919.1	-0.0560169	0.56496	0	-1.9261	-0.841857
MEAN ABS DIF	617.825	13151.3	8066.66	28618.6	18108.7	0.0391946	0.742975	0.456598	1.54895	0.855741
DESV EST	859.223	2622.27	2972.27	10766	5078.21	0.0580098	0.0769053	0.110429	0.178642	0.0165708

## Sheet: VAR_CO
	Energy	Energy	Energy	Energy	Energy	Energy	Energy	Energy	Energy	Energy			Energy	Energy	Energy	Energy	Energy	Energy	Energy	Energy	Energy	Energy			Energy	Energy	Energy	Energy	Energy	Energy	Energy	Energy	Energy	Energy
CO	Thermal	Thermal	Thermal	Thermal	Thermal	Thermal	Thermal	Thermal	Thermal	Thermal		CO	transforamation	transforamation	transforamation	transforamation	transforamation	transforamation	transforamation	transforamation	transforamation	transforamation		CO	Residential	Residential	Residential	Residential	Residential	Residential	Residential	Residential	Residential	Residential
t	power plants	power plants	power plants	power plants	power plants	power plants	power plants	power plants	power plants	power plants		t	Refinery	Refinery	Refinery	Refinery	Refinery	Refinery	Refinery	Refinery	Refinery	Refinery		t	RCAO	RCAO	RCAO	RCAO	RCAO	RCAO	RCAO	RCAO	RCAO	RCAO
	1A1a	1A1a	1A1a	1A1a	1A1a	1A1a	1A1a	1A1a	1A1a	1A1a			1A1bc	1A1bc	1A1bc	1A1bc	1A1bc	1A1bc	1A1bc	1A1bc	1A1bc	1A1bc			1A4abc	1A4abc	1A4abc	1A4abc	1A4abc	1A4abc	1A4abc	1A4abc	1A4abc	1A4abc
year	GEAA-TCNA2019	GEAA-TCNA2015	GEAA-CEDS	GEAA-EDGAR	AVERAGE	GEAA-TCNA2019	GEAA-TCNA2015	GEAA-CEDS	GEAA-EDGAR	GEAA-AVERAGE		year	GEAA-TCNA2019	GEAA-TCNA2015	GEAA-CEDS	GEAA-EDGAR	AVERAGE	GEAA-TCNA2019	GEAA-TCNA2015	GEAA-CEDS	GEAA-EDGAR	GEAA-AVERAGE		year	GEAA-TCNA2019	GEAA-TCNA2015	GEAA-CEDS	GEAA-EDGAR	AVERAGE	GEAA-TCNA2019	GEAA-TCNA2015	GEAA-CEDS	GEAA-EDGAR	GEAA-AVERAGE
1995	517.396	517.396	-2032.33	-10928.4	8706.7	0.0594251	0.0594251	-0.233422	-1.25517	-0.273948		1995	-73.9911	-73.9911	-73.9911	-7328.82	4165.25	-0.0177639	-0.0177639	-0.0177639	-1.75952	-0.362561		1995	-33951.1	-33951.1	-62293.7	129203	224737	-0.15107	-0.15107	-0.277184	0.574908	-0.000883356
1996	763.792	763.792	-3155.63	-13803.1	10746.9	0.071071	0.071071	-0.293632	-1.28438	-0.287174		1996	-107.738	-107.738	-107.738	-8108.66	4482.1	-0.0240373	-0.0240373	-0.0240373	-1.80912	-0.376247		1996	-30118.7	-30118.7	-56708.5	132811	233046	-0.12924	-0.12924	-0.243337	0.569892	0.0136152
1997	1064.77	1064.77	-2883	-13403	10240.1	0.10398	0.10398	-0.281541	-1.30888	-0.276492		1997	114.849	114.849	114.849	-8940.76	5410.03	0.0212289	0.0212289	0.0212289	-1.65263	-0.317788		1997	-33750.4	-33750.4	-62304.9	119680	212972	-0.158473	-0.158473	-0.292549	0.561952	-0.00950887
1998	845.905	845.905	-3450.93	-15902.5	11126.3	0.0760276	0.0760276	-0.31016	-1.42928	-0.317476		1998	205.971	205.971	205.971	-8467.69	5457.1	0.0377436	0.0377436	0.0377436	-1.55168	-0.28769		1998	-39222.8	-39222.8	-66160.8	113458	217104	-0.180664	-0.180664	-0.304743	0.522596	-0.0286949
1999	1006.27	1006.27	-2916.64	-16039.8	12758	0.0788739	0.0788739	-0.228612	-1.25724	-0.26562		1999	-497.483	-497.483	-497.483	-9972.84	5608.1	-0.088708	-0.088708	-0.088708	-1.77829	-0.408883		1999	-42288.7	-42288.7	-71630.7	123081	245806	-0.172041	-0.172041	-0.291411	0.500722	-0.026954
2000	96.5867	2096.81	-3350.15	-14805.9	12644.3	0.00763873	0.16583	-0.264952	-1.17095	-0.252487		2000	-958.156	-958.156	-951.372	-10382.8	5543.77	-0.172835	-0.172835	-0.171611	-1.87288	-0.478032		2000	-40494.9	-40494.9	-58424.8	120567	231332	-0.175051	-0.175051	-0.252558	0.521187	-0.0162946
2001	975.668	975.668	-3879.41	-12883	10464.8	0.0932331	0.0932331	-0.37071	-1.23107	-0.283063		2001	-929.3	-929.3	-929.3	-10346.9	5667.13	-0.163981	-0.163981	-0.163981	-1.82577	-0.463541		2001	-32971.7	-32971.7	-55161.5	112586	211781	-0.155688	-0.155688	-0.260465	0.531615	-0.00804512
2002	866.751	866.751	-4977.05	-13272.1	9805.59	0.0883935	0.0883935	-0.507572	-1.35352	-0.336861		2002	-656.694	-656.694	-656.694	-9313.23	5638.59	-0.116464	-0.116464	-0.116464	-1.65169	-0.400217		2002	-25323.1	-25323.1	-56729.4	116780	210183	-0.120481	-0.120481	-0.269905	0.555614	0.00894925
2003	621.563	621.563	-5592.09	-15889	11393.7	0.0545532	0.0545532	-0.490805	-1.39454	-0.355248		2003	-384.688	-384.688	-384.688	-9085.72	5810.31	-0.0662079	-0.0662079	-0.0662079	-1.56372	-0.35247		2003	-30084.7	-30084.7	-70421.1	138199	244341	-0.123125	-0.123125	-0.288208	0.565599	0.00622805
2004	763.308	763.308	-5728.83	-19048.9	13713	0.0556632	0.0556632	-0.417767	-1.38911	-0.339111		2004	-899.915	-899.915	-899.915	-9722.84	5664.82	-0.15886	-0.15886	-0.15886	-1.71636	-0.438588		2004	-27812.9	-27812.9	-72486.6	215899	298637	-0.0931328	-0.0931328	-0.242725	0.722947	0.0587913
2005	1109.96	1109.96	-5525.68	-18367.9	14410.9	0.0770222	0.0770222	-0.383438	-1.27459	-0.300796		2005	-1313.68	-1313.68	-1313.68	-9758.45	5679.66	-0.231295	-0.231295	-0.231295	-1.71814	-0.482405		2005	-28920.9	-28920.9	-68856.4	221491	318722	-0.0907399	-0.0907399	-0.216039	0.694934	0.059483
2006	1021.75	1021.75	-5627.72	-18839.6	15000	0.0681168	0.0681168	-0.375182	-1.25597	-0.298984		2006	-996.761	-996.761	-996.761	-9567.86	5597.62	-0.178069	-0.178069	-0.178069	-1.70927	-0.448696		2006	-4990.18	-4990.18	-40480	121667	240128	-0.0207814	-0.0207814	-0.168577	0.506677	0.0593074
2007	768.031	768.031	-6865.56	-22055.1	16692.9	0.0460095	0.0460095	-0.411287	-1.32123	-0.328099		2007	-1231.81	-1231.81	-1231.81	-9983.4	5953.81	-0.206894	-0.206894	-0.206894	-1.67681	-0.459498		2007	39979.4	39979.4	3586.73	150809	237892	0.168057	0.168057	0.0150771	0.633939	0.197026
2008	902.845	902.845	-7194.9	-22095.7	17910.1	0.0504097	0.0504097	-0.401722	-1.2337	-0.30692		2008	-1500.57	-1500.57	-1500.57	-11179.5	6353.34	-0.236186	-0.236186	-0.236186	-1.75962	-0.493636		2008	-4159.01	-4159.01	-36398.5	189094	269214	-0.0154487	-0.0154487	-0.135203	0.702394	0.107259
2009	835.453	835.453	-7278.52	-21929.6	17203.5	0.048563	0.048563	-0.423084	-1.27472	-0.320135		2009	-1064.62	-1064.62	-1064.62	-11158.3	6541.21	-0.162756	-0.162756	-0.162756	-1.70584	-0.438822		2009	-15387.4	-15387.4	-50107.4	169529	262691	-0.0585759	-0.0585759	-0.190746	0.645355	0.0674914
2010	-230.371	-992.224	-8583.97	-25843.8	18541.8	-0.0124244	-0.0535127	-0.462951	-1.39381	-0.384539		2010	-1035.35	-1035.35	-1171.59	-10943.7	6461.06	-0.160245	-0.160245	-0.181331	-1.69379	-0.439122		2010	-16644.3	-16644.3	-69611.6	133298	235619	-0.0706406	-0.0706406	-0.295441	0.565732	0.025802
2011	-978.26	430.487	-8599.3	-25498.7	19585.8	-0.0499473	0.0219795	-0.439057	-1.30189	-0.353784		2011	-1209.91	-1209.91	-1209.91	-10880.6	6342.24	-0.19077	-0.19077	-0.19077	-1.71557	-0.457577		2011	-22315.1	-22315.1	-46755.6	116615	225281	-0.0990545	-0.0990545	-0.207543	0.517642	0.0223981
2012	-401.254	-372.165	-9387.45	-27782.5	21432.5	-0.0187218	-0.0173645	-0.438001	-1.29628	-0.354073		2012	-1123.07	-1123.07	-997.089	-11048.1	6560.33	-0.171192	-0.171192	-0.151987	-1.68407	-0.435688		2012	-30445.5	-30445.5	-79810.6	98578.3	233203	-0.130553	-0.130553	-0.342236	0.422714	-0.0361257
2013	-432.271		-8431.95	-26939.3	22704	-0.0190395		-0.371386	-1.18654	-0.394243		2013	-2160.22		-1048.77	-10087	7023.86	-0.307554		-0.149315	-1.43611	-0.473245		2013	21310.6		-23651.8	171685	248420	0.0857845		-0.0952087	0.691107	0.170421
2014	-127.684		-8132.05	-25804.1	22550.6	-0.00566208		-0.360613	-1.14427	-0.377637		2014	-3214.62		-1117.56	-12343.3	7849.25	-0.409545		-0.142378	-1.57255	-0.531118		2014	5142.71		-21679.7	150549	255306	0.0201433		-0.0849164	0.589682	0.131227
2015	-548.67			-26344.7	23396.3	-0.0234511			-1.12602	-0.383156		2015	-1425.68			-12661.5	8393.97	-0.169846			-1.50841	-0.559418		2015	43661.3			163351	232434	0.187844			0.702783	0.296876
MEAN ABS DIF	708.503	759.769	5409.2	19403.6	15287	0.0527727	0.0585728	0.355519	1.28015	0.323326		MEAN ABS DIF	1005	681.169	784.493	10061	6009.69	0.156771	0.114535	0.128456	1.6839	0.433583		MEAN ABS DIF	27094.1	23755.3	51107.6	143282	242326	0.114599	0.10061	0.213051	0.585714	0.0643515
DESV EST	640.46	630.14	2292.43	5446.64	4715.74	0.0453783	0.0465994	0.0815513	0.0830743	0.0424113		DESV EST	774.666	516.718	499.765	1305.39	964.101	0.105738	0.0845736	0.0803476	0.108379	0.0665861		DESV EST	25082	19157.8	20782.9	34001.3	27284	0.107439	0.083017	0.0895002	0.0816936	0.0857583
	Energy	Energy	Energy	Energy	Energy	Energy	Energy	Energy	Energy	Energy			Energy	Energy	Energy	Energy	Energy	Energy	Energy	Energy	Energy	Energy			Energy	Energy	Energy	Energy	Energy	Energy	Energy	Energy	Energy	Energy
CO	Industry	Industry	Industry	Industry	Industry	Industry	Industry	Industry	Industry	Industry		CO	Transport	Industry	Industry	Industry	Industry	Industry	Industry	Industry	Industry	Industry		CO	fugitve	Industry	Industry	Industry	Industry	Industry	Industry	Industry	Industry	Industry
t	own energy	own energy	own energy	own energy	own energy	own energy	own energy	own energy	own energy	own energy		t	R+RR+Nav	R+RR+Nav	R+RR+Nav	R+RR+Nav	R+RR+Nav	R+RR+Nav	R+RR+Nav	R+RR+Nav	R+RR+Nav	R+RR+Nav		t	fuels prod	R+RR+Nav	R+RR+Nav	R+RR+Nav	R+RR+Nav	R+RR+Nav	R+RR+Nav	R+RR+Nav	R+RR+Nav	R+RR+Nav
	1A2	1A2	1A2	1A2	1A2	1A2	1A2	1A2	1A2	1A2			1A3bc	1A3bc	1A3bc	1A3bc	1A3bc	1A3bc	1A3bc	1A3bc	1A3bc	1A3bc			1B1-1B2	1B1-1B2	1B1-1B2	1B1-1B2	1B1-1B2	1B1-1B2	1B1-1B2	1B1-1B2	1B1-1B2	1B1-1B2
year	GEAA-TCNA2019	GEAA-TCNA2015	GEAA-CEDS	GEAA-EDGAR	AVERAGE	GEAA-TCNA2019	GEAA-TCNA2015	GEAA-CEDS	GEAA-EDGAR	GEAA-AVERAGE		year	GEAA-TCNA2019	GEAA-TCNA2015	GEAA-CEDS	GEAA-EDGAR	AVERAGE	GEAA-TCNA2019	GEAA-TCNA2015	GEAA-CEDS	GEAA-EDGAR	GEAA-AVERAGE		year	GEAA-TCNA2019	GEAA-TCNA2015	GEAA-CEDS	GEAA-EDGAR	AVERAGE	GEAA-TCNA2019	GEAA-TCNA2015	GEAA-CEDS	GEAA-EDGAR	GEAA-AVERAGE
1995	-7347.27	-7347.27	-7347.27	112375	292660	-0.0251052	-0.0251052	-0.0251052	0.383977	0.0617323		1995	376815	376815	384297	-893660	2.32144e+06	0.162319	0.162319	0.165542	-0.384959	0.0210443		1995	2171.59	2171.59	-118976	-131078	53420.4	0.0406511	0.0406511	-2.22717	-2.45372	-0.919917
1996	2488.43	2488.43	2488.43	124988	289918	0.0085832	0.0085832	0.0085832	0.431116	0.0913732		1996	335475	335475	346465	-774601	2.24345e+06	0.149535	0.149535	0.154434	-0.345272	0.0216464		1996	1732.29	1732.29	-124960	-144538	57151.9	0.0303102	0.0303102	-2.18645	-2.52901	-0.930967
1997	-6354.53	-6354.53	-6354.53	133766	320048	-0.0198549	-0.0198549	-0.0198549	0.417957	0.0716785		1997	272055	272055	282554	-650515	2.10687e+06	0.129128	0.129128	0.134111	-0.308759	0.0167214		1997	1587.96	1587.96	-99158.5	-109265	45062.4	0.0352391	0.0352391	-2.20047	-2.42474	-0.910948
1998	5894.39	5894.39	5894.39	135415	343459	0.0171619	0.0171619	0.0171619	0.394268	0.0891506		1998	221237	221237	232224	-568757	2.04514e+06	0.108177	0.108177	0.113549	-0.278102	0.0103603		1998	1054.98	1054.98	-106696	-112156	46925.5	0.0224821	0.0224821	-2.27373	-2.39009	-0.92377
1999	-10890.3	-10890.3	-10890.3	129437	341282	-0.0319101	-0.0319101	-0.0319101	0.379266	0.0567071		1999	170657	170657	179477	-543199	1.87254e+06	0.0911365	0.0911365	0.0958471	-0.290087	-0.00239336		1999	2159.43	2159.43	-121375	-124829	53100.1	0.0406672	0.0406672	-2.28578	-2.35082	-0.911053
2000	-21251.1	-21251.1	-4363.98	131479	333470	-0.0637273	-0.0637273	-0.0130866	0.394276	0.050747		2000	172840	728235	125622	-501975	1.57613e+06	0.109661	0.462039	0.0797025	-0.318485	0.0665834		2000	1953.23	1953.23	-104843	-107033	45962.7	0.042496	0.042496	-2.28104	-2.3287	-0.904948
2001	-35851.4	-35851.4	-35851.4	106118	332291	-0.107892	-0.107892	-0.107892	0.319353	-0.000864355		2001	128407	128407	134995	-363199	1.43976e+06	0.0891866	0.0891866	0.0937621	-0.252264	0.0039743		2001	1161.75	1161.75	-108151	-110433	46829.8	0.0248079	0.0248079	-2.30946	-2.35818	-0.923604
2002	38555.4	38555.4	38555.4	141654	296192	0.13017	0.13017	0.13017	0.478249	0.173752		2002	123365	123365	127786	-183041	1.38997e+06	0.0887536	0.0887536	0.0919346	-0.131687	0.0275509		2002	1102.48	1102.48	-108236	-110637	46758.3	0.0235783	0.0235783	-2.31479	-2.36615	-0.926757
2003	37482.3	37482.3	37482.3	134145	300714	0.124644	0.124644	0.124644	0.446089	0.164004		2003	52006.7	52006.7	56986.8	-376446	1.18056e+06	0.0440527	0.0440527	0.0482711	-0.318871	-0.036499		2003	1021.18	1021.18	-113854	-115694	48944.9	0.0208638	0.0208638	-2.32616	-2.36377	-0.92964
2004	26352.5	26352.5	26352.5	239641	287802	0.0915647	0.0915647	0.0915647	0.83266	0.221471		2004	146331	146331	152258	7093.76	1.47823e+06	0.0989906	0.0989906	0.103	0.00479883	0.0611561		2004	405.593	405.593	-119210	-120081	50596.4	0.00801624	0.00801624	-2.35609	-2.37331	-0.942674
2005	11887.3	11887.3	11887.3	244735	301784	0.0393902	0.0393902	0.0393902	0.810961	0.185826		2005	230134	230134	236487	-10289.9	1.52079e+06	0.151325	0.151325	0.155503	-0.00676614	0.0902775		2005	-880.542	-880.542	-178190	-180786	73746.6	-0.0119401	-0.0119401	-2.41625	-2.45145	-0.978316
2006	-3959.93	-3959.93	-3959.93	246038	344452	-0.0114963	-0.0114963	-0.0114963	0.714289	0.13596		2006	410897	410897	418308	-71250.9	1.57398e+06	0.261056	0.261056	0.265765	-0.045268	0.148522		2006	-1339.02	-1339.02	-133877	-127674	54120.7	-0.0247414	-0.0247414	-2.47368	-2.35906	-0.976444
2007	-53212	-53212	-53212	247625	371960	-0.143058	-0.143058	-0.143058	0.665728	0.0473108		2007	1.15297e+06	1.15297e+06	1.15754e+06	27856.1	1.45834e+06	0.7906	0.7906	0.793737	0.0191012	0.478808		2007	-1124.47	-1124.47	-126963	-120418	51563	-0.0218077	-0.0218077	-2.46229	-2.33535	-0.968252
2008	-32202.6	-32202.6	-32202.6	260711	351796	-0.0915375	-0.0915375	-0.0915375	0.741085	0.0932945		2008	308368	308368	312707	19618	2.16991e+06	0.142111	0.142111	0.144111	0.00904092	0.0874749		2008	-172.52	-172.52	-136367	-130013	55830.3	-0.00309008	-0.00309008	-2.44253	-2.32872	-0.955486
2009	-37971.7	-37971.7	-37971.7	259188	353327	-0.107469	-0.107469	-0.107469	0.733565	0.0822315		2009	282732	199388	203647	-73216.6	2.19508e+06	0.128803	0.0908338	0.0927741	-0.0333548	0.0558111		2009	-145.41	-145.41	-142918	-124742	55879.6	-0.00260219	-0.00260219	-2.55761	-2.23233	-0.959028
2010	10894.7	10894.7	12970.4	290698	329280	0.0330864	0.0330864	0.0393903	0.882827	0.197678		2010	-22682.5	994432	173587	-225537	2.11741e+06	-0.0107124	0.469645	0.0819807	-0.106515	0.0868797		2010	1374.75	1374.75	-149908	-134606	60192.9	0.0228391	0.0228391	-2.49047	-2.23624	-0.936206
2011	11371.8	11371.8	11371.8	282274	324899	0.0350011	0.0350011	0.0350011	0.868805	0.194762		2011	-117986	237891	259646	-324866	2.48757e+06	-0.0474303	0.0956319	0.104377	-0.130596	0.00439664		2011	1267.02	1267.02	-151560	-133262	60116.8	0.021076	0.021076	-2.52109	-2.21671	-0.93913
2012	-39097.3	-39097.3	-10459.7	254099	320265	-0.122078	-0.122078	-0.0326595	0.793402	0.103317		2012	66616.8	1.11924e+06	338373	-369509	2.40106e+06	0.0277447	0.466145	0.140927	-0.153894	0.0961844		2012	1014.15	1014.15	-153155	-132927	60289.9	0.0168212	0.0168212	-2.54031	-2.2048	-0.942293
2013	-62924.9		-13395.6	246575	295533	-0.21292		-0.0453268	0.83434	0.144023		2013	448707		518370	-147004	2.72442e+06	0.164698		0.190268	-0.0539578	0.075252		2013	1154.48		-154456	-120133	71942.4	0.0160473		-2.14694	-1.66985	-0.950186
2014	-103130		-42406.7	203579	291950	-0.353245		-0.145253	0.697306	0.0497019		2014	221565		588574	-121255	2.72499e+06	0.0813085		0.215991	-0.0444974	0.0632006		2014	1016.4		-156048	-161075	82436.6	0.0123295		-1.89294	-1.95393	-0.958636
2015	-109051			217449	274211	-0.397691			0.792998	0.131769		2015	361964			-48210.7	2.97118e+06	0.121825			-0.0162261	0.0351996		2015	889.4			-166348	58364.2	0.0152388			-2.85017	-0.944976
MEAN ABS DIF	31817.7	18717.4	19305.6	197238	318919	0.103218	0.0573205	0.0600264	0.619644	0.111779		MEAN ABS DIF	267800	343233	296662	300052	1.99994e+06	0.142788	0.18527	0.155504	0.154881	0.0709493		MEAN ABS DIF	1177.56	1031.83	124233	129416	56154.1	0.0217926	0.0197157	2.22406	2.32272	0.939678
DESV EST	40306.8	26820.6	25521.5	64610.2	26723.2	0.137299	0.0822323	0.0794697	0.199489	0.0608915		DESV EST	250963	350681	241390	275414	508876	0.1634	0.199563	0.157144	0.138868	0.103579		DESV EST	1018.37	1100.22	21643.7	19618.2	9789.97	0.0192653	0.020879	0.161791	0.221607	0.0211044
	Industry	Industry	Industry	Industry	Industry	Industry	Industry	Industry	Industry	Industry
CO	manufacture	manufacture	manufacture	manufacture	manufacture	manufacture	manufacture	manufacture	manufacture	manufacture
t	Production	Production	Production	Production	Production	Production	Production	Production	Production	Production
	2A-2H	2A-2H	2A-2H	2A-2H	2A-2H	2A-2H	2A-2H	2A-2H	2A-2H	2A-2H
year	GEAA-TCNA2019	GEAA-TCNA2015	GEAA-CEDS	GEAA-EDGAR	AVERAGE	GEAA-TCNA2019	GEAA-TCNA2015	GEAA-CEDS	GEAA-EDGAR	GEAA-AVERAGE
1995			-25411.2	-1281.62	76095.8			-0.333938	-0.0168422	-0.610825
1996			-26316.6	-482.131	77640.3			-0.338955	-0.00620981	-0.618598
1997			-29206	-2002.14	79315.8			-0.368224	-0.0252426	-0.6183
1998			-29999.3	-2881.36	81045.9			-0.370152	-0.0355522	-0.633797
1999			-36334.5	-4010.12	82939.9			-0.438082	-0.0483497	-0.59446
2000			-28129.4	2625.19	84703.4			-0.332093	0.0309928	-0.511341
2001			-32813.8	2801.68	86503.9			-0.379333	0.0323879	-0.427492
2002			-9706.2	-8314.74	87975.3			-0.110329	-0.0945121	-0.400091
2003			-38590.2	2432.78	89659.4			-0.430409	0.0271336	-0.370756
2004			-46046.5	-5532.88	90956.7			-0.506246	-0.0608298	-0.326917
2005			-38179.3	-2154.78	91774.7			-0.416011	-0.023479	-0.340223
2006			-26056.5	5788.27	93015.1			-0.280131	0.0622294	-0.315913
2007			-38621.4	-2479.87	94712.3			-0.407776	-0.0261832	-0.346568
2008			-18548.4	9234.29	96262.8			-0.192685	0.0959279	-0.223335
2009			-10408.2	15815	97885.9			-0.10633	0.161566	-0.196748
2010			-43598.7	3910.54	99924			-0.436318	0.0391351	-0.217324
2011			-71681.5	-6939.74	100833			-0.710891	-0.0688239	-0.202596
2012			-74989.4	-7774.08	100140			-0.748847	-0.0776322	-0.171936
2013			-71804.2	-9630.83	98725.7			-0.72731	-0.0975514	-0.204334
2014			-103806	-21072.1	97624.9			-1.06331	-0.215848	-0.177473
2015			-103791	-18161.3	93068.6				-0.195139	-0.153252
MEAN ABS DIF			43049.4	6444.07	90514.5			0.414161	0.0686461	0.36487
DESV EST			26937	8370.47	7836.85			0.229298	0.0874083	0.171005

[truncated: 12 more sheets: N2O_1A1B, CH4_1A1B, CO_1A1B, CO2_1A1B, SO2_1A1B, VOC_1A1B, NOX_1A1B, NH3_1A1B, PM10_EDGAR, PM25_EDGAR, CO2EQ_EDGAR, CO2_other]
