# Supplementary material for: High-resolution seasonal and decadal inventory of anthropogenic gas-phase and particle emissions for Argentina
Source: Copernicus journal article supplement (doi:10.5194/essd-13-5027-2021), 2021-10-29
Supplement: Supplementary file 1 [file essd-13-5027-2021-supplement.zip › essd-13-5027-2021-supplement-title-page.pdf]

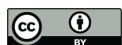

## *Supplement of*

# **High-resolution seasonal and decadal inventory of anthropogenic gas-phase and particle emissions for Argentina**

**S. Enrique Puliafito et al.**

*Correspondence to:* S. Enrique Puliafito ([epuliafito@frm.utn.edu.ar](mailto:epuliafito@frm.utn.edu.ar))

- [essd-13-5027-2021-supplement-title-page.pdf](#)
- [Supplement.pdf](#)
- [comp\\_geaa\\_ceds\\_edgar\\_tcna.xlsx](#)

The copyright of individual parts of the supplement might differ from the article licence.
