# Supplementary material for: High-resolution seasonal and decadal inventory of anthropogenic gas-phase and particle emissions for Argentina
Source: Copernicus journal article supplement (doi:10.5194/essd-13-5027-2021), 2021-10-29
Supplement: Supplementary file 1 [file essd-13-5027-2021-supplement.zip › Supplement.pdf]

5

10

15

20 The supplementary material is organized as follows. Figure S1 shows the Summary of total Argentine emissions of different  
pollutants and sectors for year 2019 within the GEAA-AEIV3.0M inventory. Figure S2 to Figure S17 show the monthly and  
annual variations for all the sectors analyzed. In all Figures, left vertical axis shows the emissions for each polluting species  
in Megagrams (Mg), while right vertical axis refers only to CO<sub>2eq</sub> emissions in Gigagrams (Gg). Table S1 and Table S2 show  
the comparison of GEAA-AEIV3.0M Vs EDGAR inventories for GHG and other species (NO<sub>x</sub>, CO, PM<sub>10</sub> and PM<sub>2.5</sub>)  
25 respectively. All abbreviations and codes shown in this supplementary material correspond to the definitions in Table 1a of  
the main text of this manuscript. The whole inventory dataset (monthly gridded 1995-2020) for 12 polluting species from 15  
sectors is available in a freely accessible repository (<http://dx.doi.org/10.17632/d6xrhpmzdp.1>). The next table of contents has  
the list with hyperlinks to reach each figure or table.

## Contents

|    |                                                                                                                                                                                                                                                                                                                 |    |
|----|-----------------------------------------------------------------------------------------------------------------------------------------------------------------------------------------------------------------------------------------------------------------------------------------------------------------|----|
|    | Figure S1. Summary of total Argentine emissions of different pollutants for year 2019 within the GEAA-AEIV3.0M inventory. CO <sub>2eq</sub> values are in Gg. ....                                                                                                                                              | 3  |
|    | Figure S2 Monthly (a) and annual (b) emissions for all sectors (a). All CO <sub>2eq</sub> values are in Gg.....                                                                                                                                                                                                 | 3  |
| 35 | Figure S3. Monthly (a) and annual (b) emissions from electricity production at thermal power plants (TPP: 1A1a). All CO <sub>2eq</sub> values are in Gg. ....                                                                                                                                                   | 4  |
|    | Figure S4. Monthly (a) and annual (b) emissions from fuel burning at manufacturing industries (MFC: 1A1b). All CO <sub>2eq</sub> values are in Gg. Residue crops, wood and other primaries used in as industrial fuel do not include CO <sub>2</sub> emissions for their calculation in CO <sub>2eq</sub> ..... | 5  |
| 40 | Figure S5. Monthly (a) and annual (b) emissions from refineries by own consumption (ROC: 1A1c). All CO <sub>2eq</sub> values are in Gg. ....                                                                                                                                                                    | 6  |
|    | Figure S6. Monthly (a) and annual (b) emissions from oil and natural gas production at well (FPR: 1Ab2). All CO <sub>2eq</sub> values are in Gg. ....                                                                                                                                                           | 7  |
|    | Figure S7. Monthly (a) and annual (b) emissions from refineries, and gas and oil production (venting and flare) (FUG: 1B2). All CO <sub>2eq</sub> values are in Gg.....                                                                                                                                         | 8  |
| 45 | Figure S8. Monthly (a) and annual (b) emissions from road transport (ROT: 1A3b). All CO <sub>2eq</sub> values are in Gg. ....                                                                                                                                                                                   | 9  |
|    | Figure S9. Monthly (a) and annual (b) emissions from aviation fuel consumption (DOA: 1A3a). All CO <sub>2eq</sub> values are in Gg. ....                                                                                                                                                                        | 10 |
|    | Figure S10. Monthly (a) and annual (b) emissions from railroad and domestic shipping (R+N: 1A3c, d). All CO <sub>2eq</sub> values are in Gg. ....                                                                                                                                                               | 11 |
| 50 | Figure S11. Monthly (a) and annual (b) emissions from Residential, Commercial and Governmental sectors, for natural gas use (R+C: 1A4a, b,c). All CO <sub>2eq</sub> values are in Gg. ....                                                                                                                      | 12 |
|    | Figure S12. Monthly (a) and annual (b) emissions from Residential (coal/wood). All CO <sub>2eq</sub> values are in Gg.....                                                                                                                                                                                      | 13 |
|    | Figure S13. Monthly (a) and annual (b) emissions from agriculture and other sectors. All CO <sub>2eq</sub> values are in Gg.....                                                                                                                                                                                | 14 |
|    | Figure S14. Monthly (a) and annual (b) emissions from production manufacturing industries. All CO <sub>2eq</sub> values are in Gg. ..                                                                                                                                                                           | 15 |
| 55 | Figure S15. Annual emissions from livestock production (LF: 4A + 4B). All CO <sub>2eq</sub> values are in Gg.....                                                                                                                                                                                               | 16 |
|    | Figure S16. Annual emissions from agriculture production (AG: 4C + 3C3). All CO <sub>2eq</sub> values are in Gg.....                                                                                                                                                                                            | 16 |
|    | Figure S17. Monthly (a) and annual (b) emissions from biomass burning (OBB AWB: 4F). All CO <sub>2eq</sub> values are in Gg. ....                                                                                                                                                                               | 17 |
| 60 | Figure S18: Coal production and coal import in Argentina (ktoe). Red line data used in GEAA (only national coal gross production), green line: National Energy Balance (NEB) data of import + national net production; blue line NEB net coal production; black line: estimation of EDGAR data. ....            | 18 |

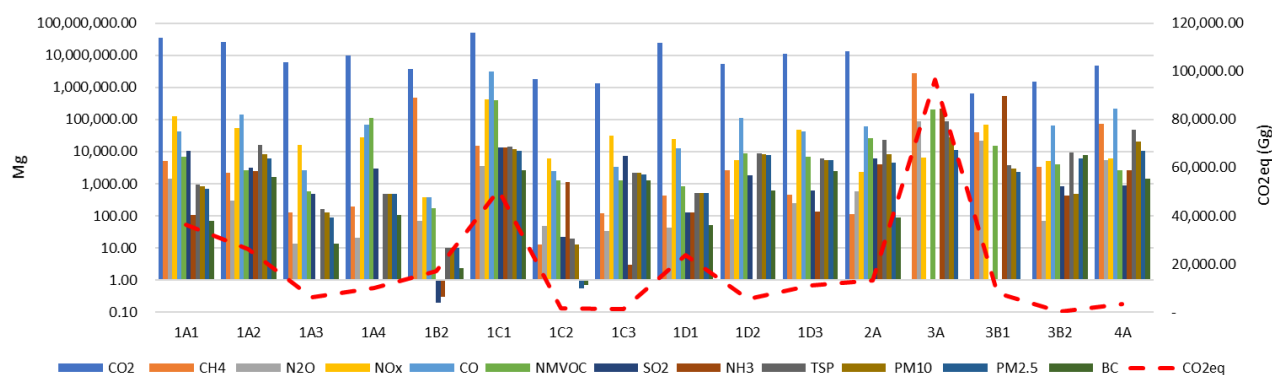

Figure S1. Summary of total Argentine emissions of different pollutants for year 2019 within the GEAA-AEIV3.0M inventory. CO<sub>2eq</sub> values are in Gg.

(a)

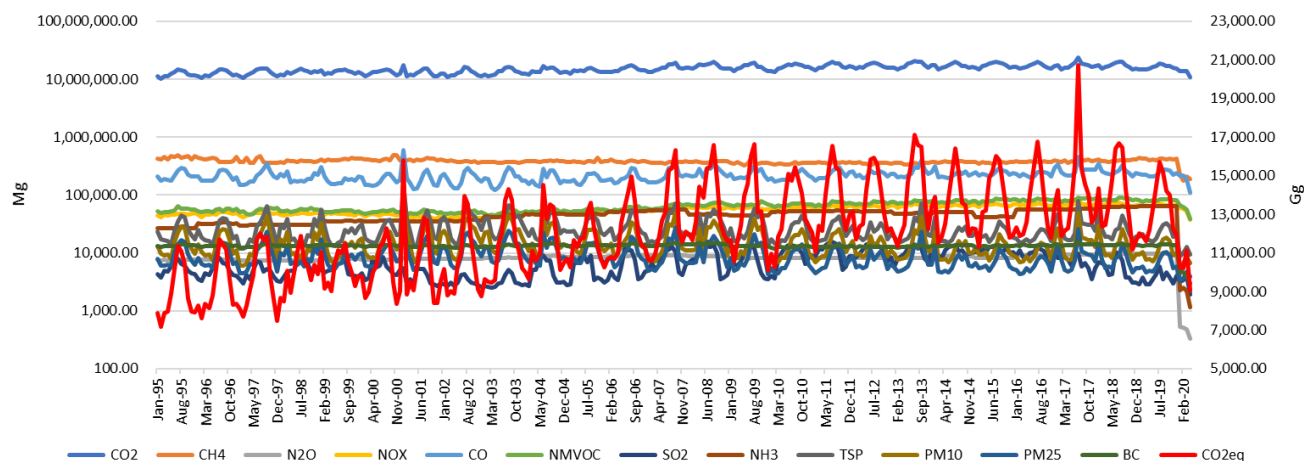

(b)

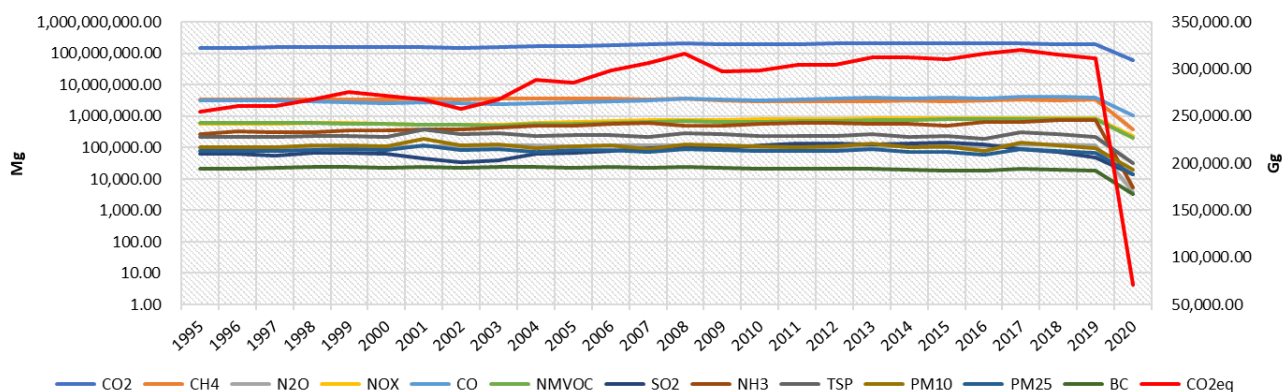

Figure S2 Monthly (a) and annual (b) emissions for all sectors (a). All CO<sub>2eq</sub> values are in Gg.

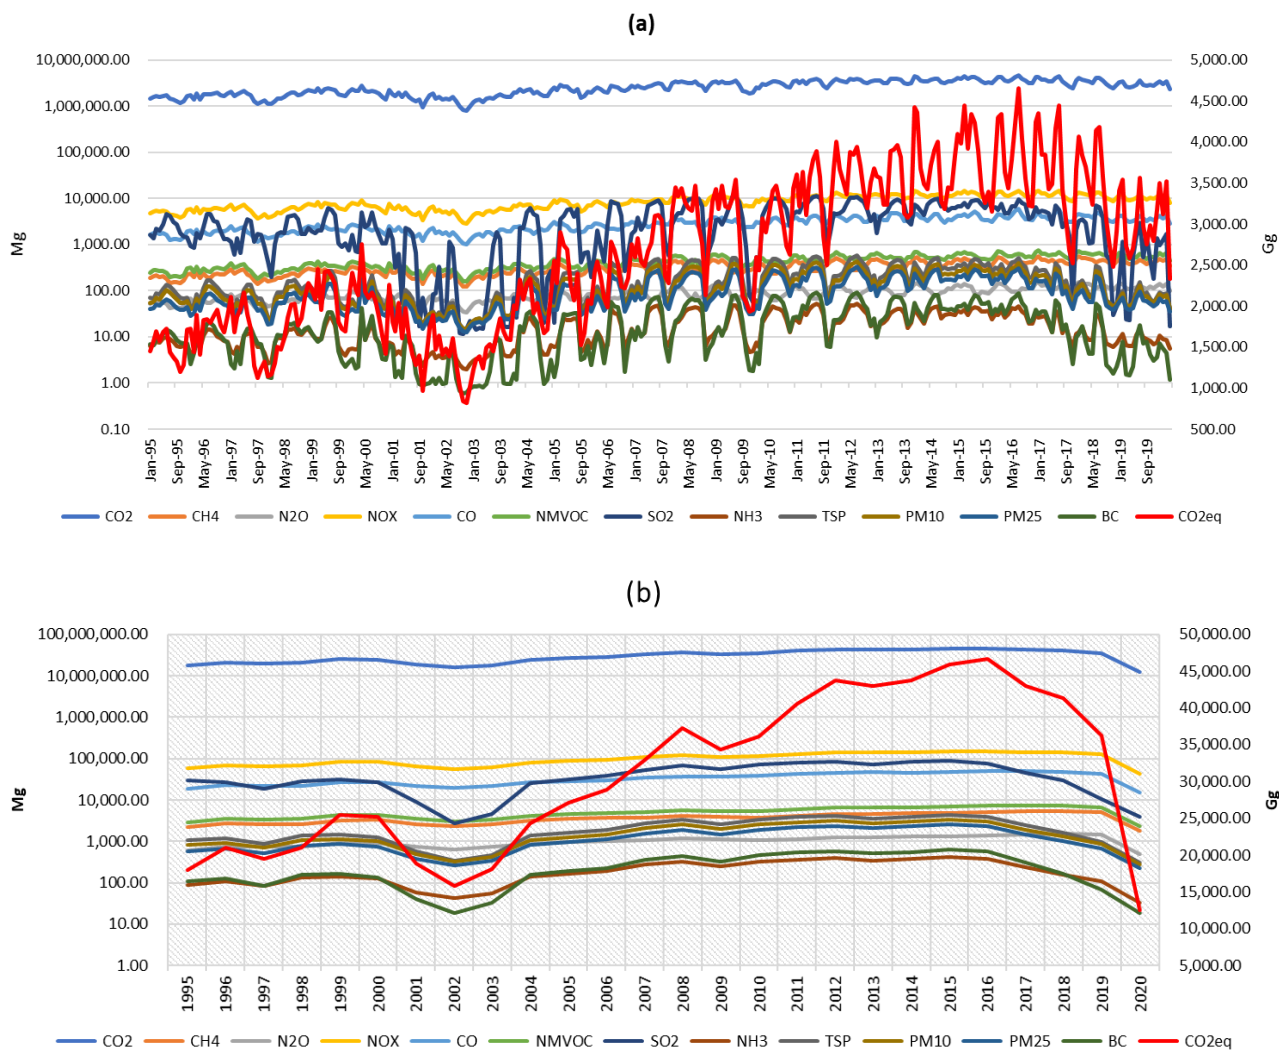

Figure S3. Monthly (a) and annual (b) emissions from electricity production at thermal power plants (TPP: 1A1a). All CO<sub>2eq</sub> values are in Gg.

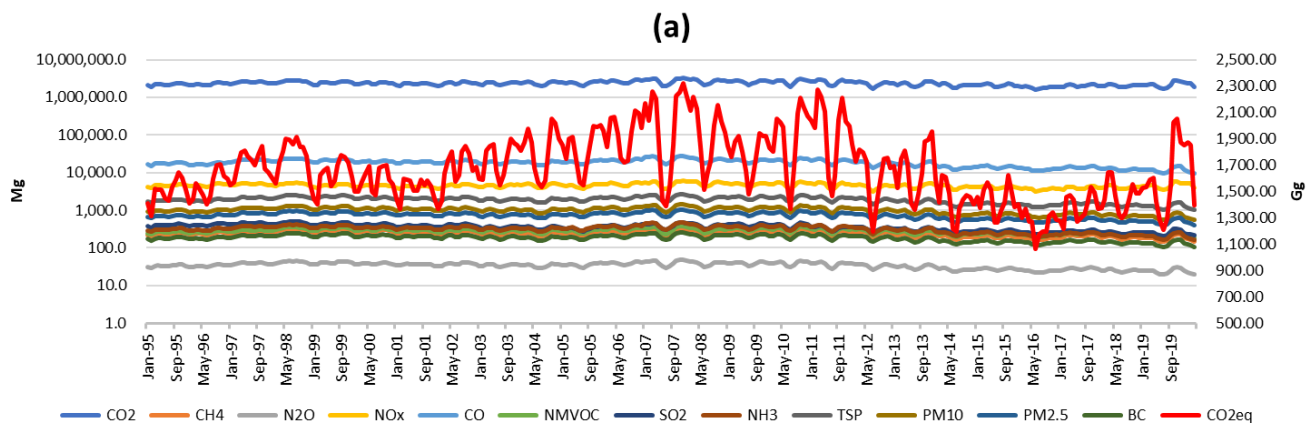

75

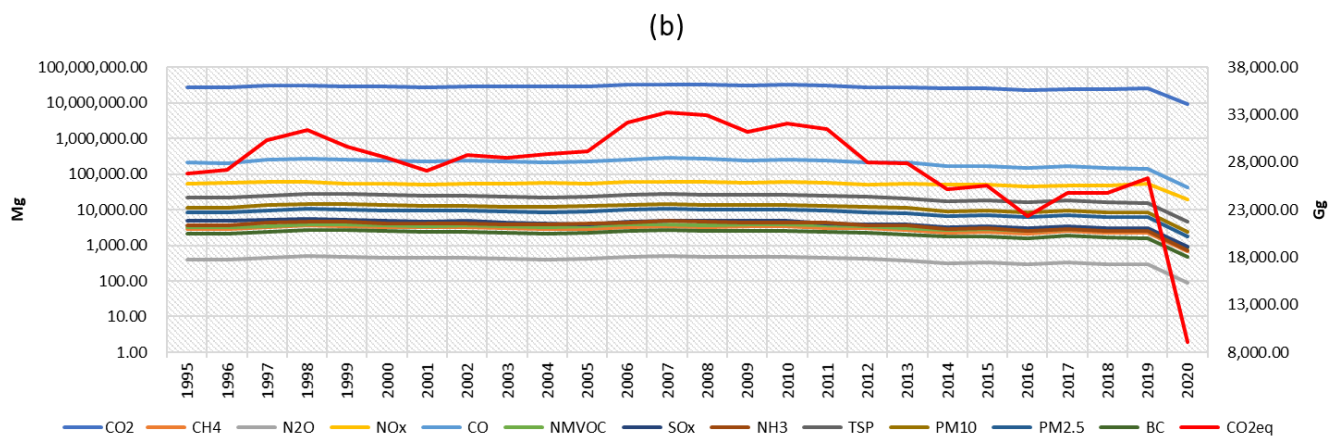

**Figure S4. Monthly (a) and annual (b) emissions from fuel burning at manufacturing industries (MFC: 1A1b). All CO<sub>2eq</sub> values are in Gg. Residue crops, wood and other primaries used in as industrial fuel do not include CO<sub>2</sub> emissions for their calculation in CO<sub>2eq</sub>.**

80

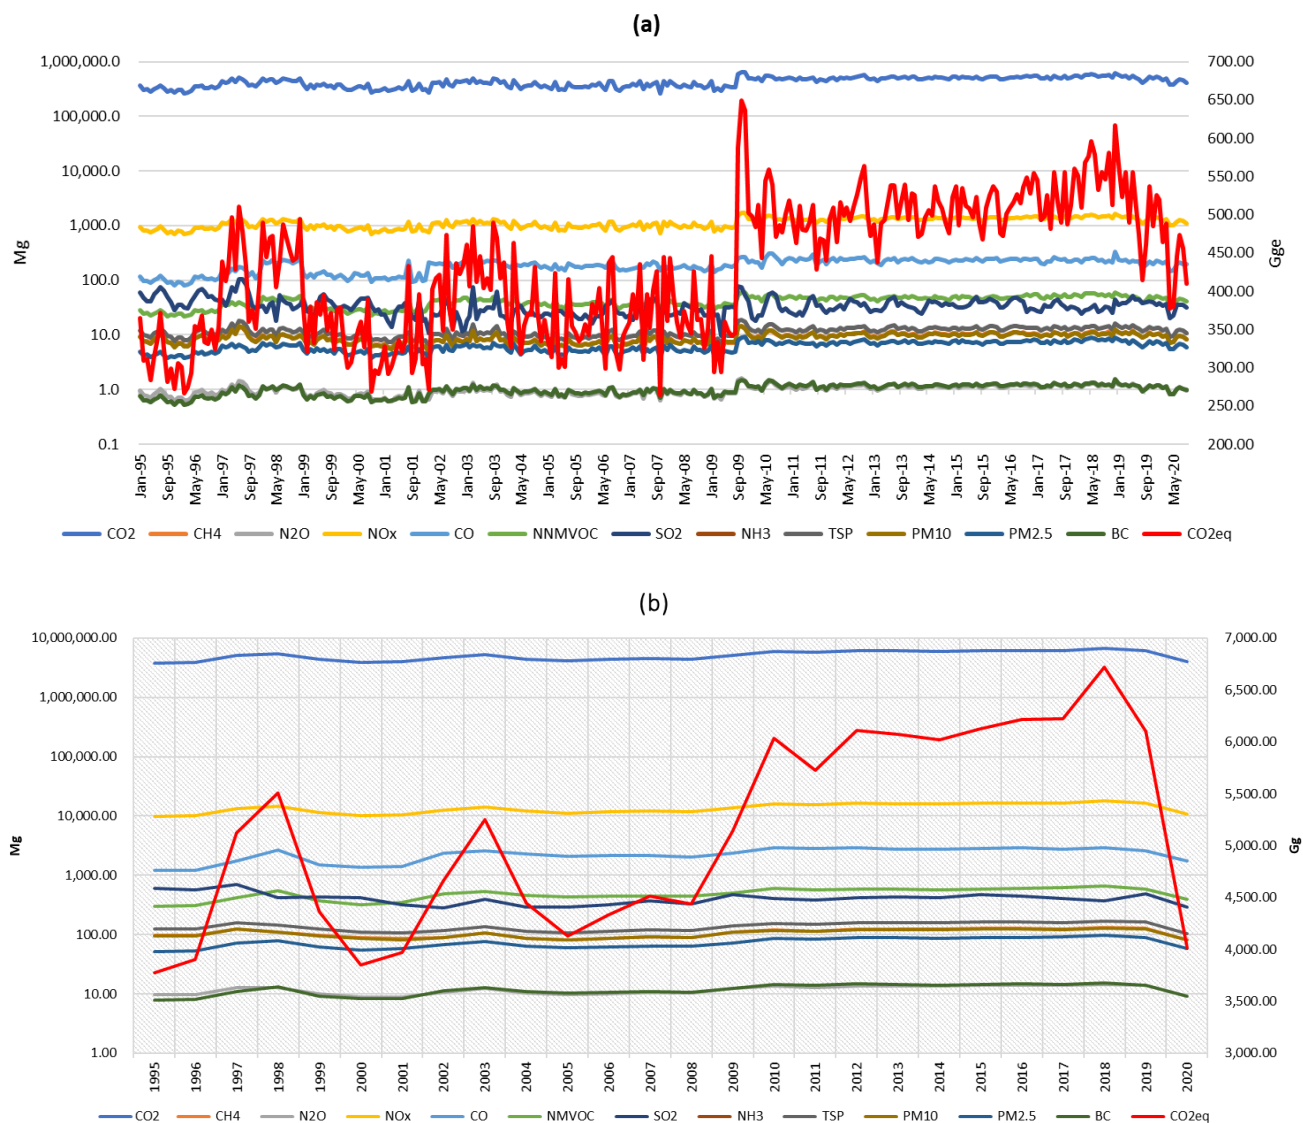

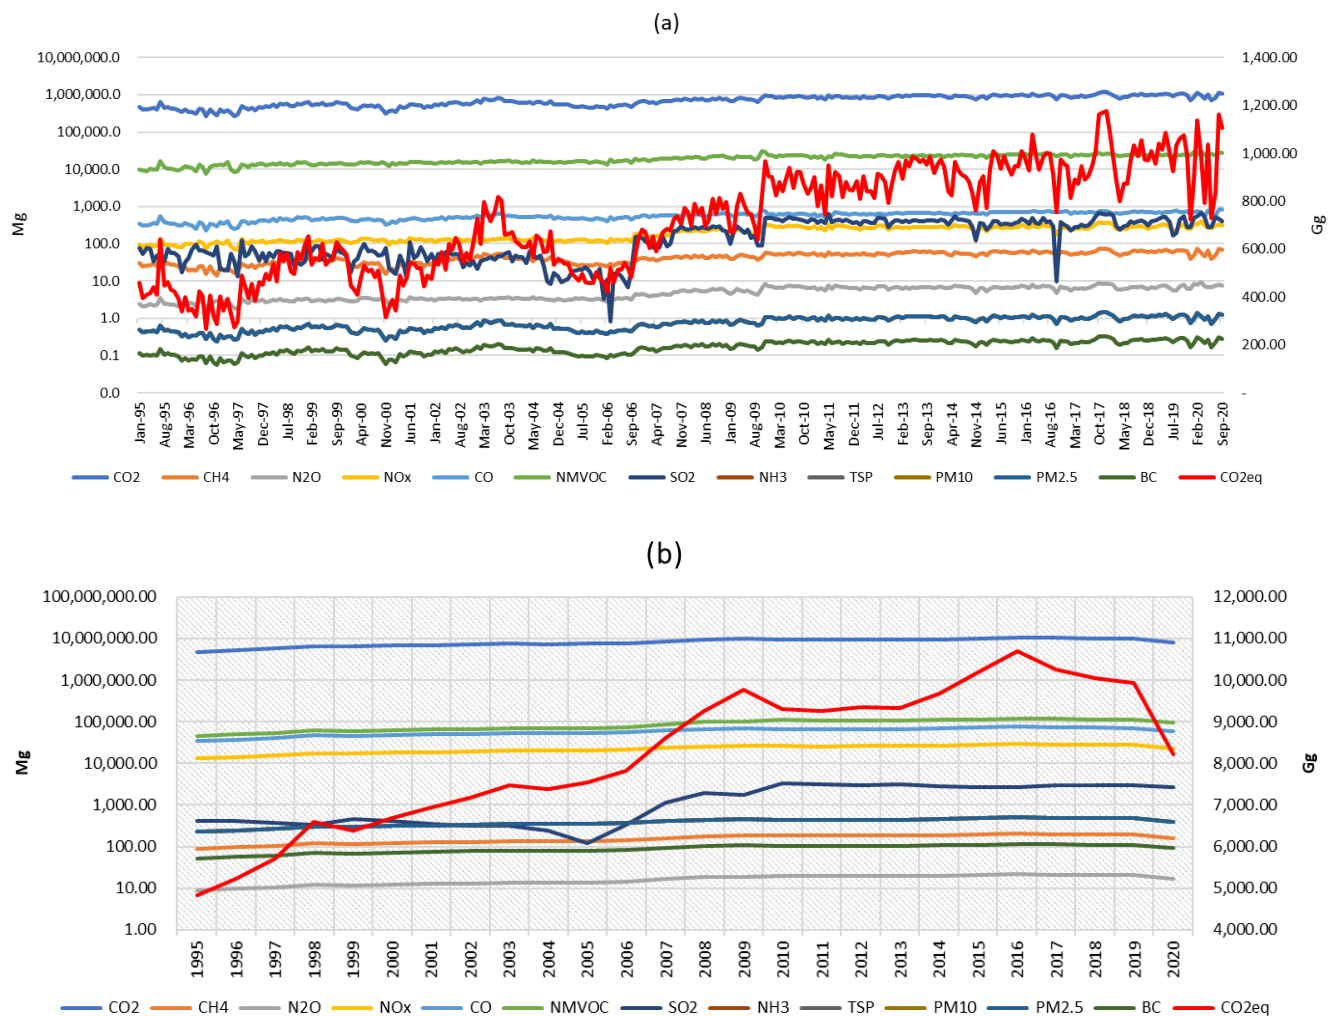

Figure S6. Monthly (a) and annual (b) emissions from oil and natural gas production at well (FPR: 1Ab2). All CO<sub>2eq</sub> values are in Gg.

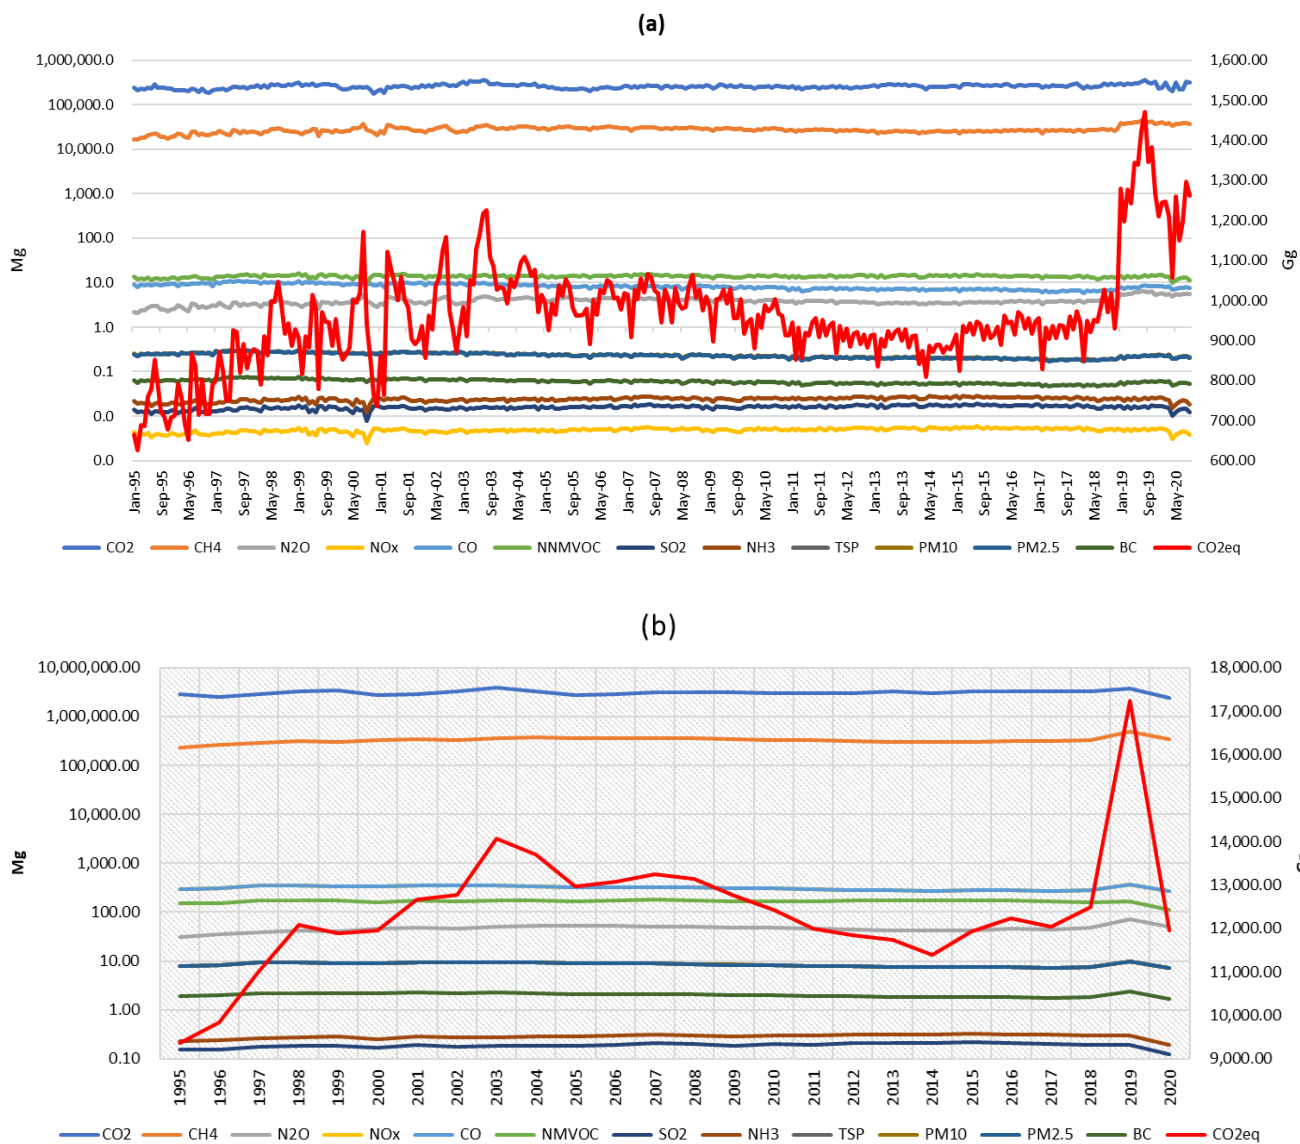

95 **Figure S7. Monthly (a) and annual (b) emissions from refineries, and gas and oil production (venting and flare) (FUG: 1B2). All CO<sub>2eq</sub> values are in Gg.**

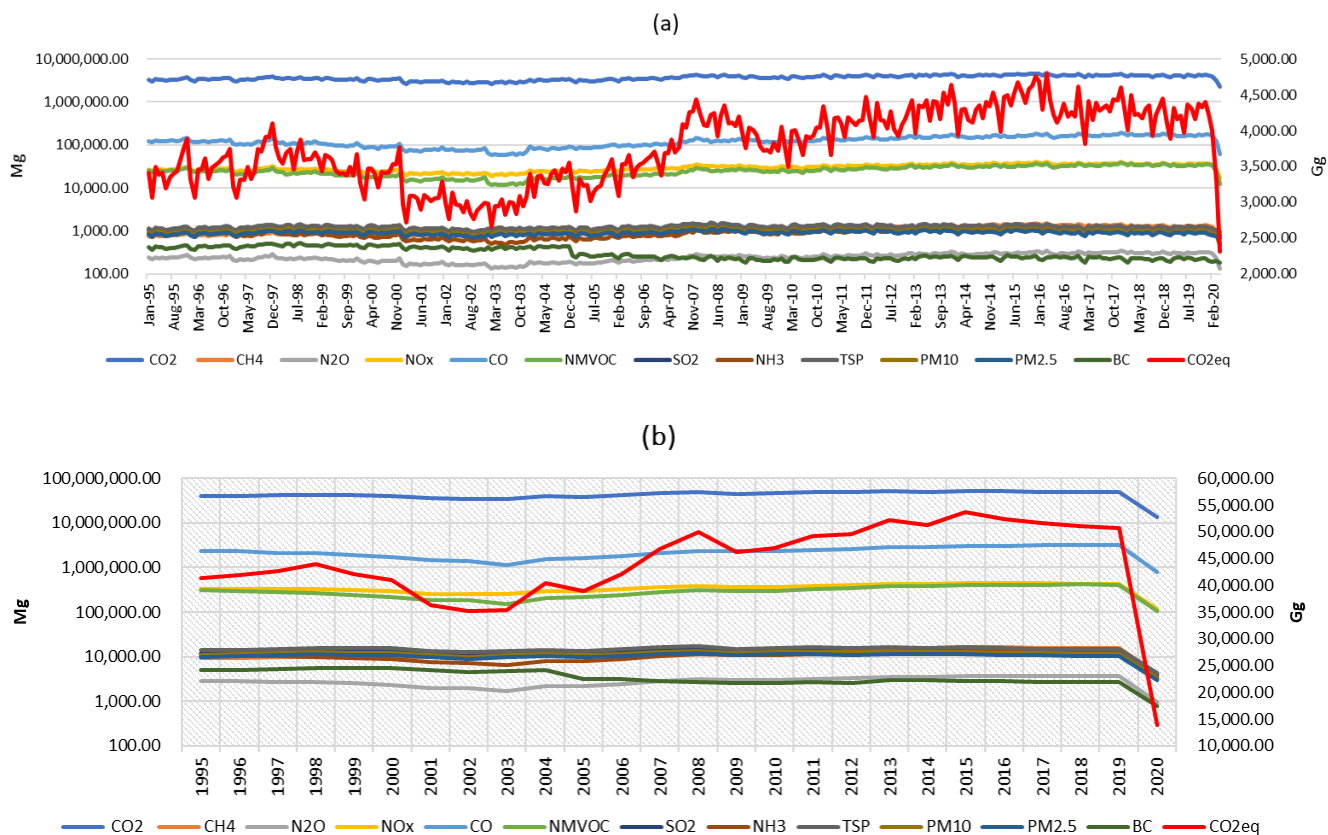

Figure S8. Monthly (a) and annual (b) emissions from road transport (ROT: 1A3b). All CO<sub>2eq</sub> values are in Gg.

100

105

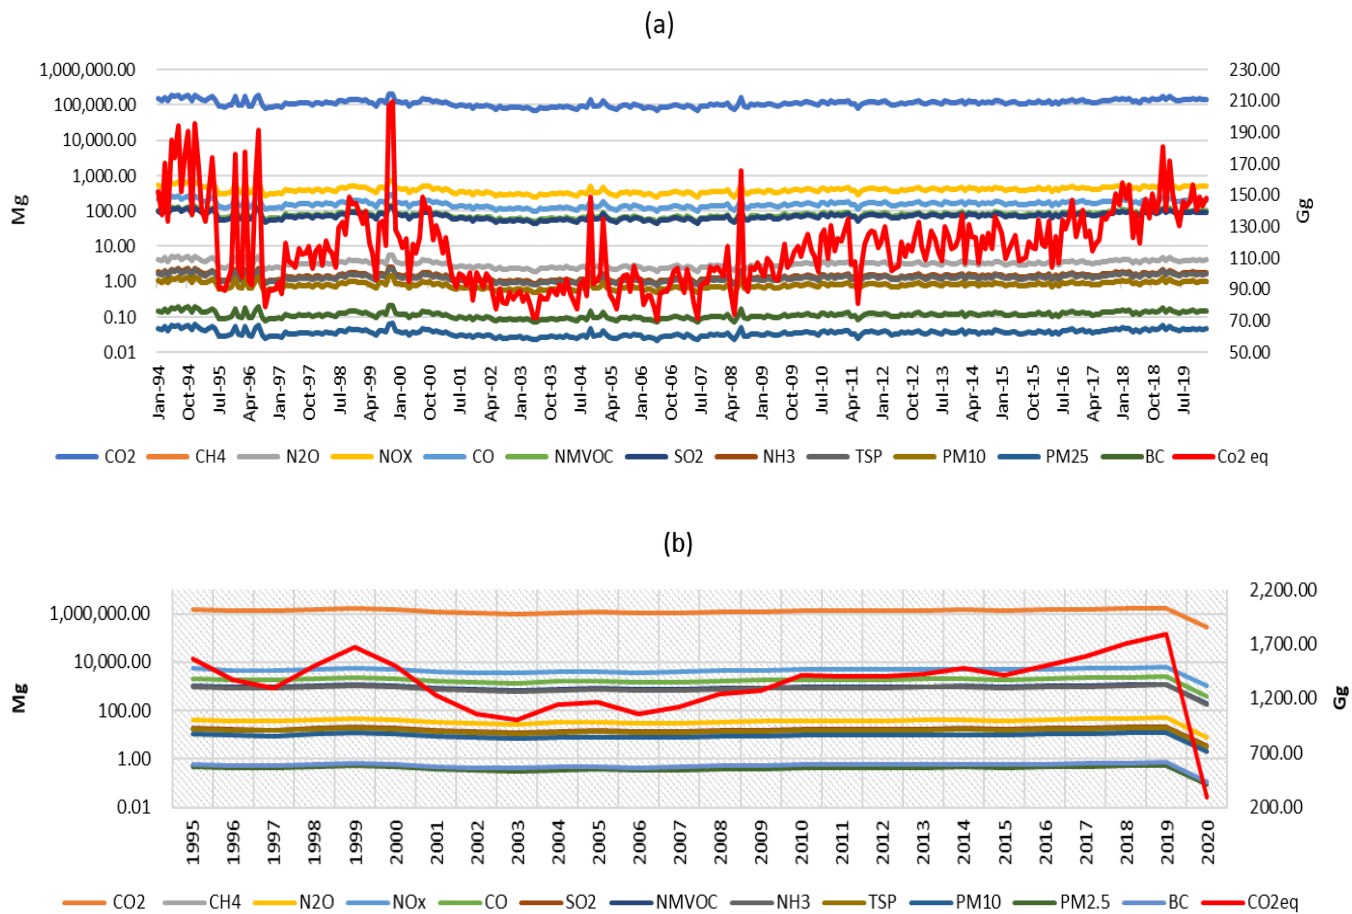

110

115

120

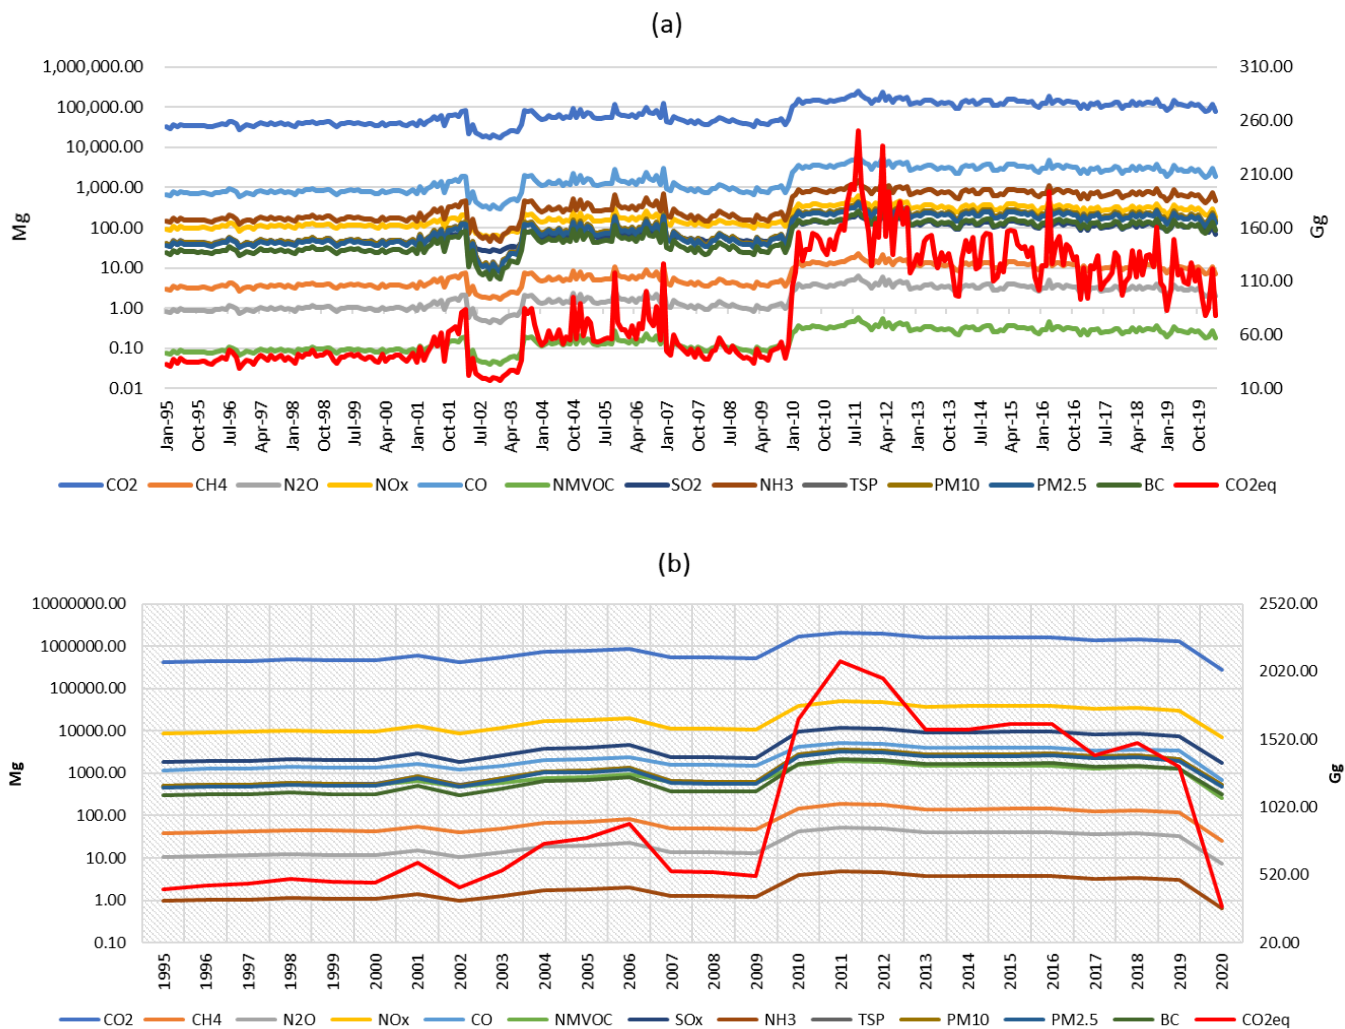

Figure S10. Monthly (a) and annual (b) emissions from railroad and domestic shipping (R+N: 1A3c, d). All CO<sub>2eq</sub> values are in Gg.

125

130

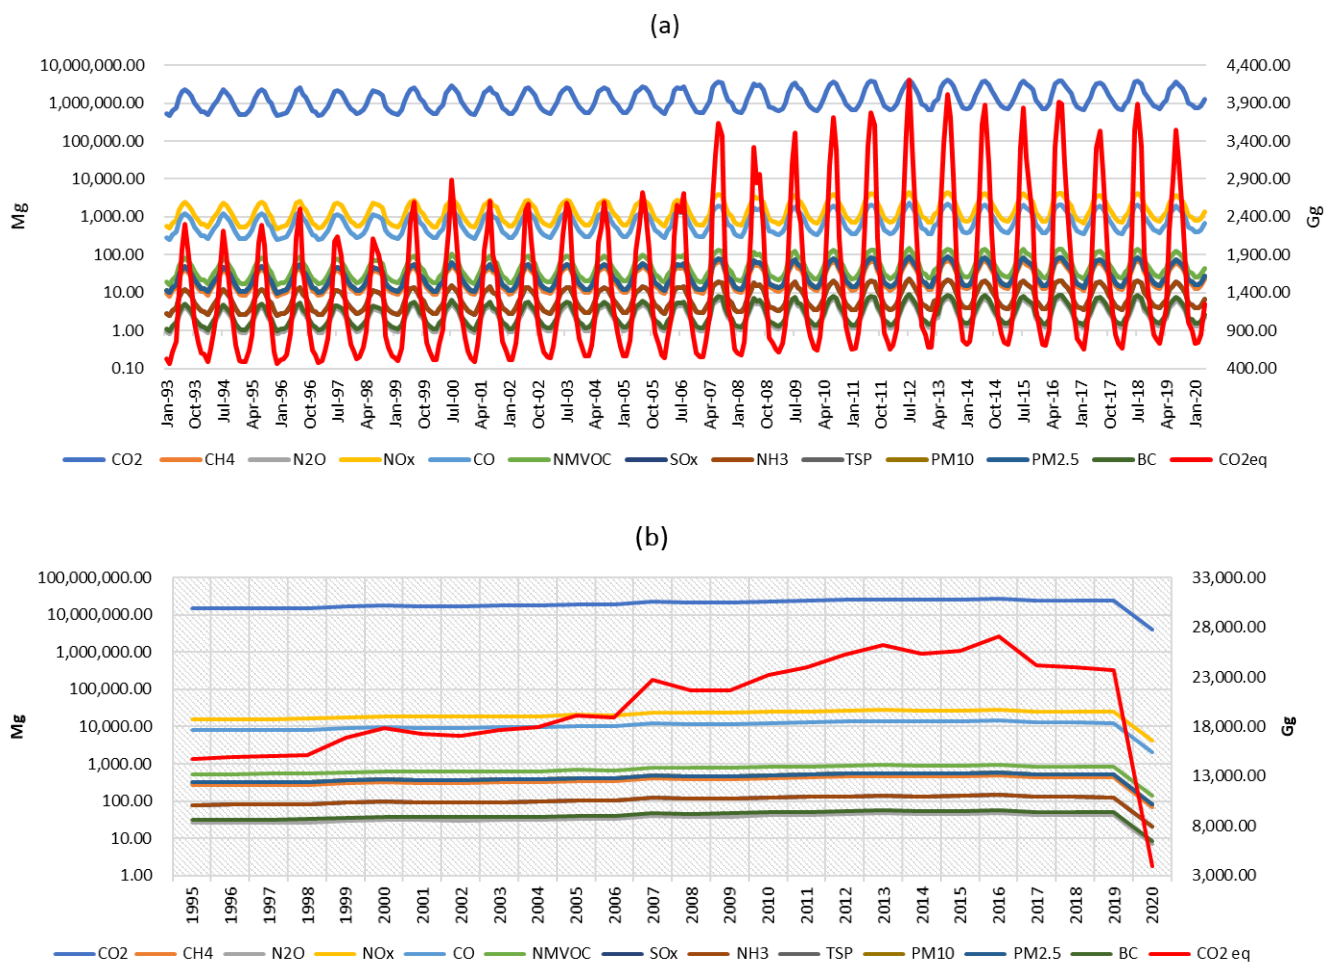

135 **Figure S11. Monthly (a) and annual (b) emissions from Residential, Commercial and Governmental sectors, for natural gas use (R+C: 1A4a, b,c). All CO<sub>2</sub>eq values are in Gg.**

140

145

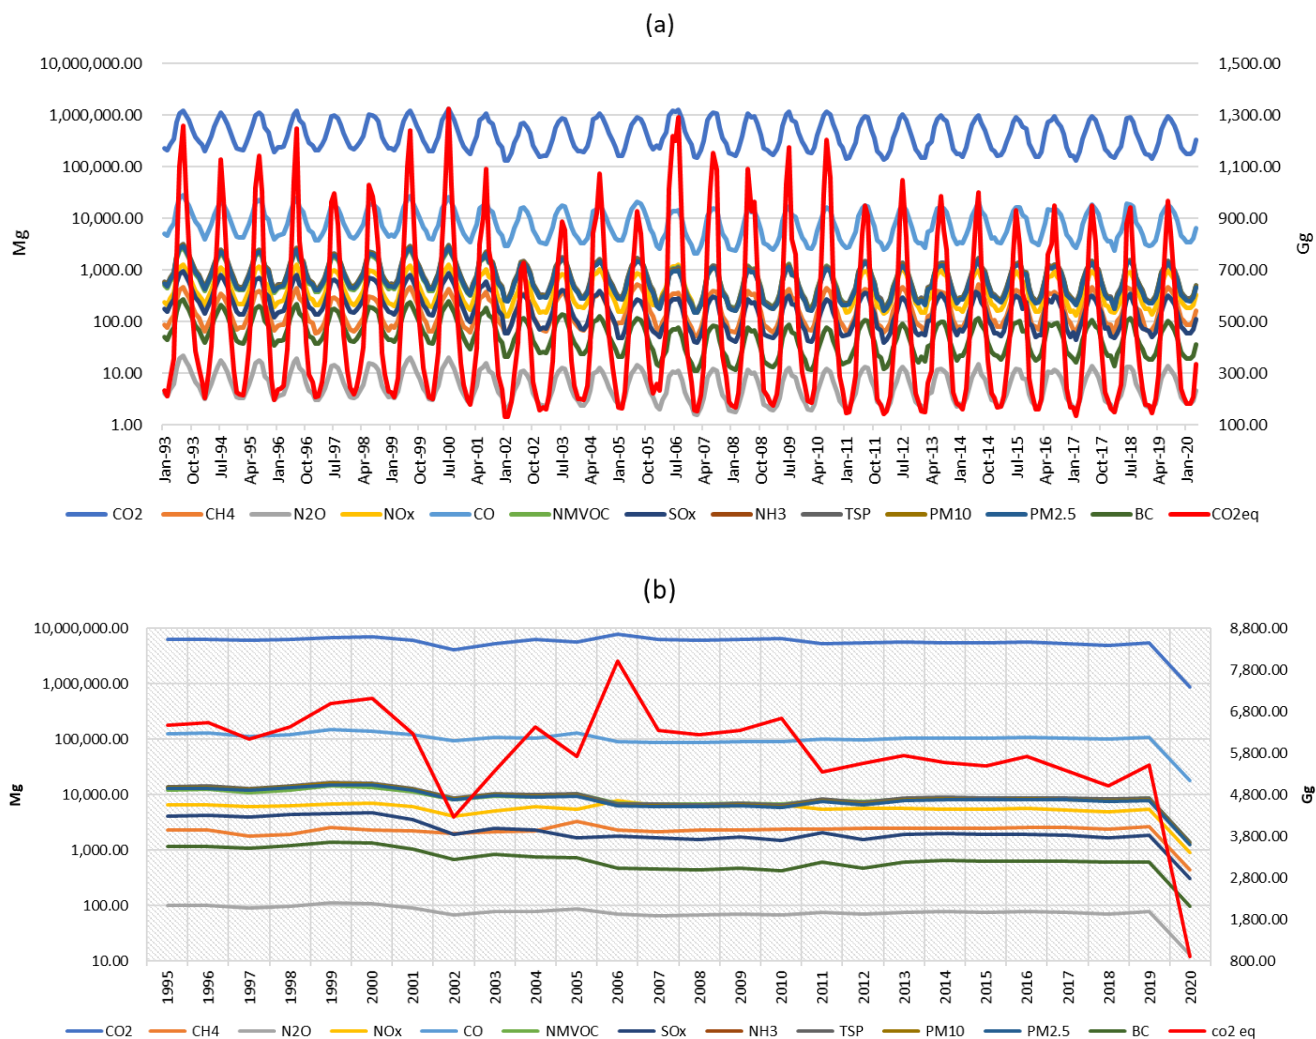

150

155

160

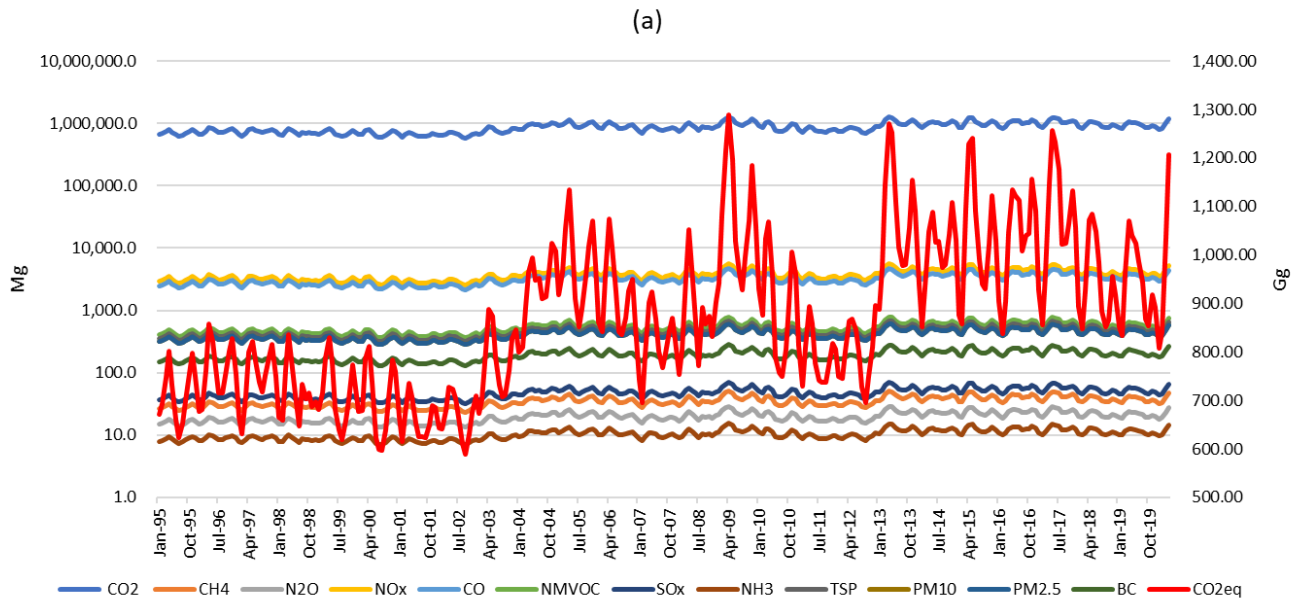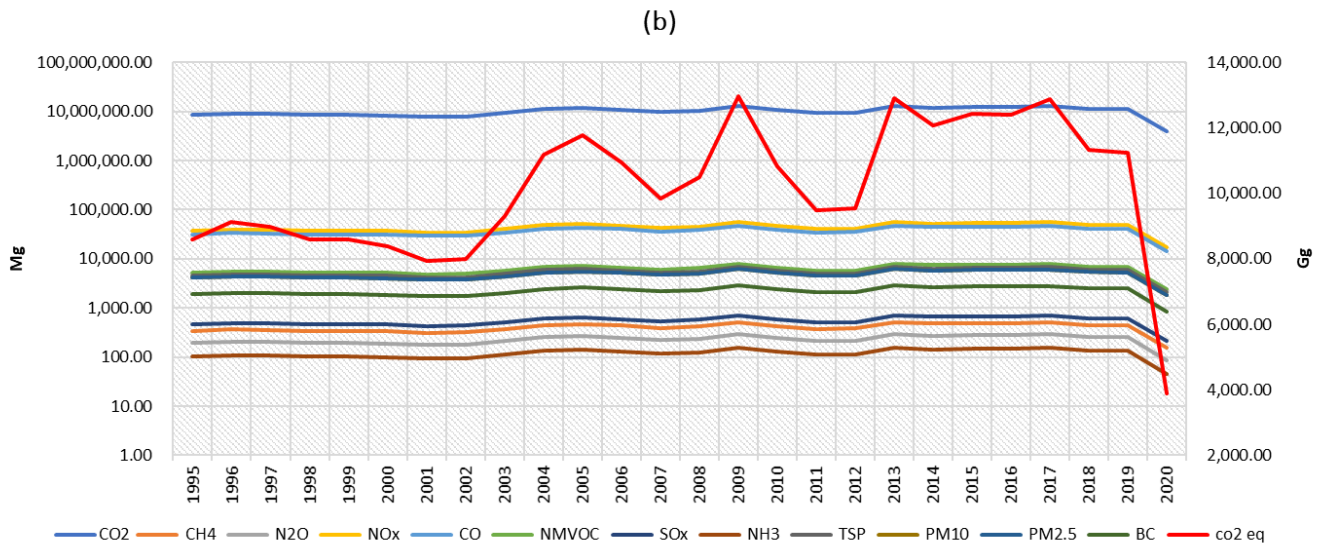

Figure S13. Monthly (a) and annual (b) emissions from agriculture and other sectors. All CO<sub>2eq</sub> values are in Gg.

165

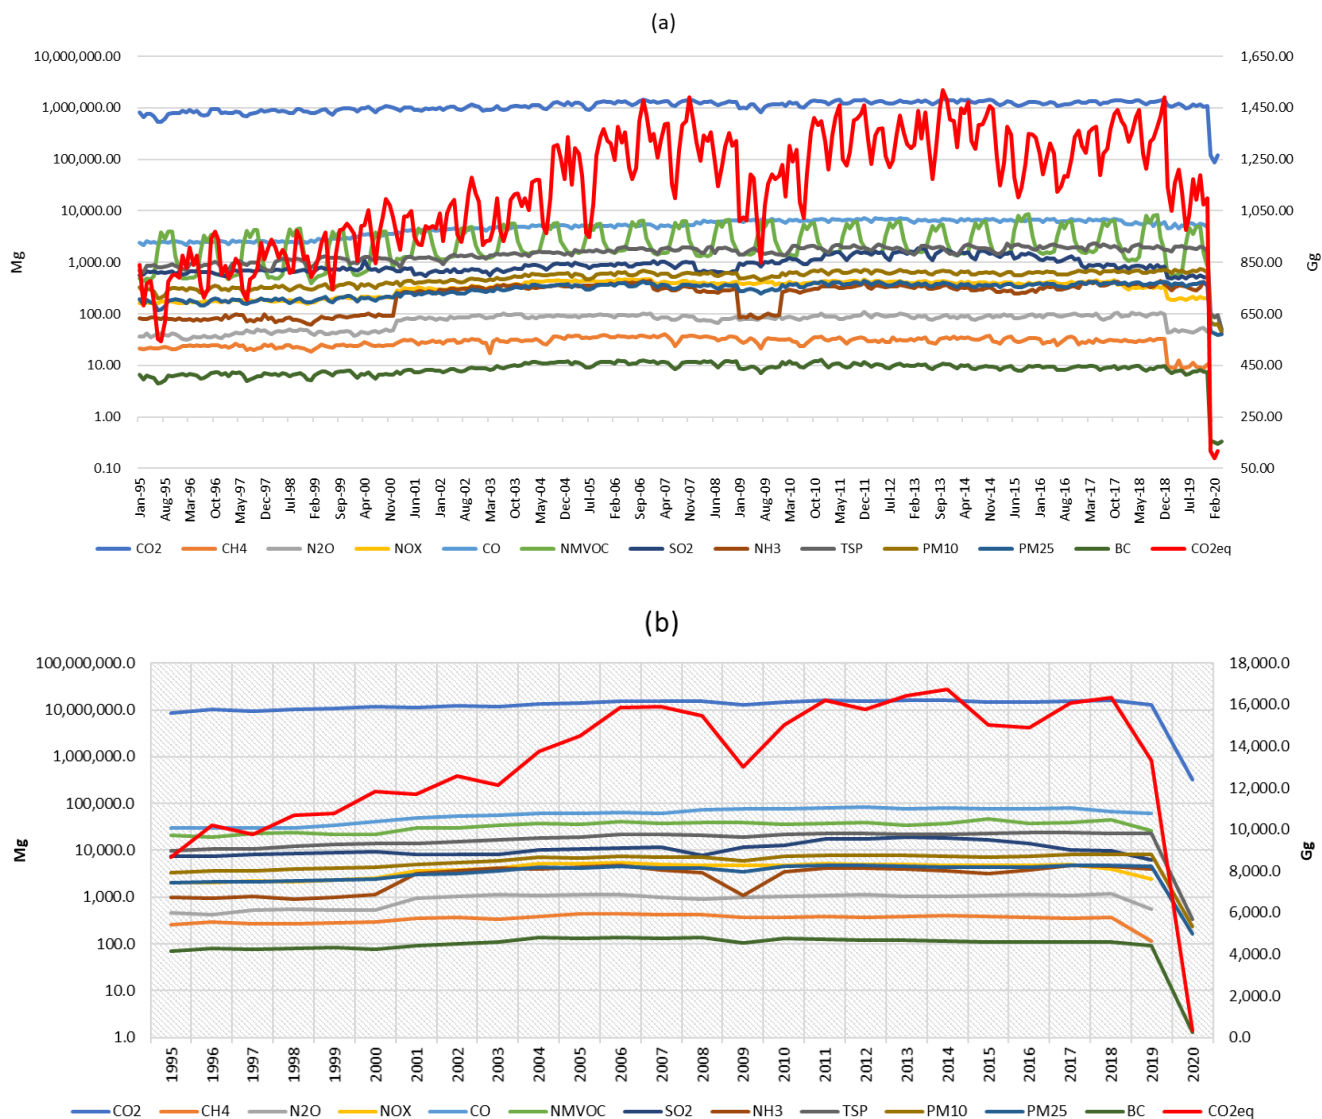

Figure S14. Monthly (a) and annual (b) emissions from production manufacturing industries. All CO<sub>2eq</sub> values are in Gg.

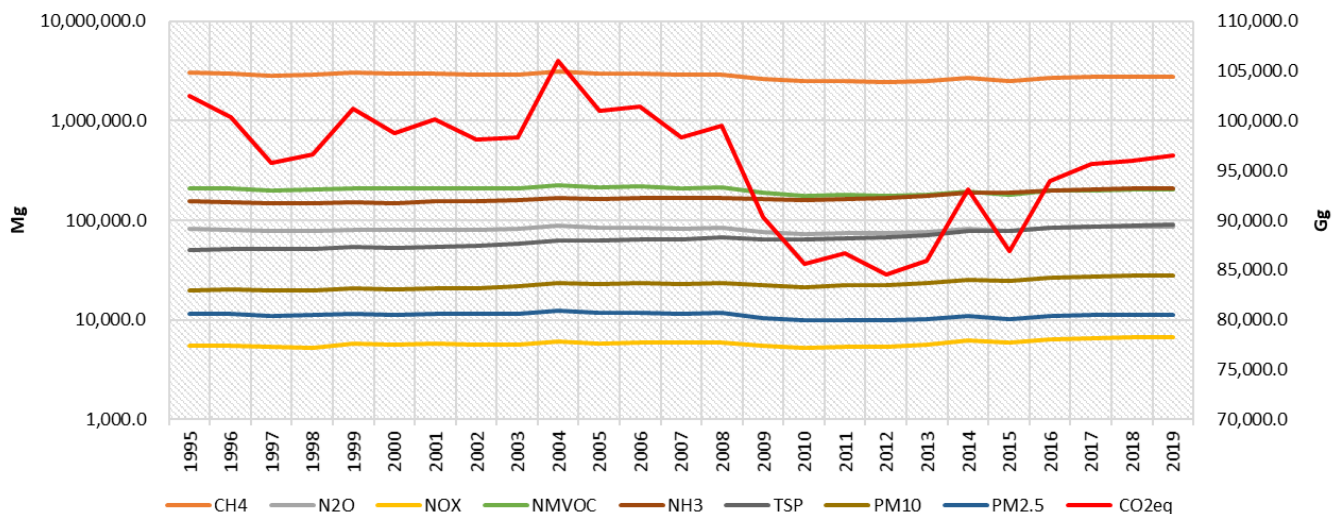

Figure S15. Annual emissions from livestock production (LF: 4A + 4B). All CO<sub>2eq</sub> values are in Gg.

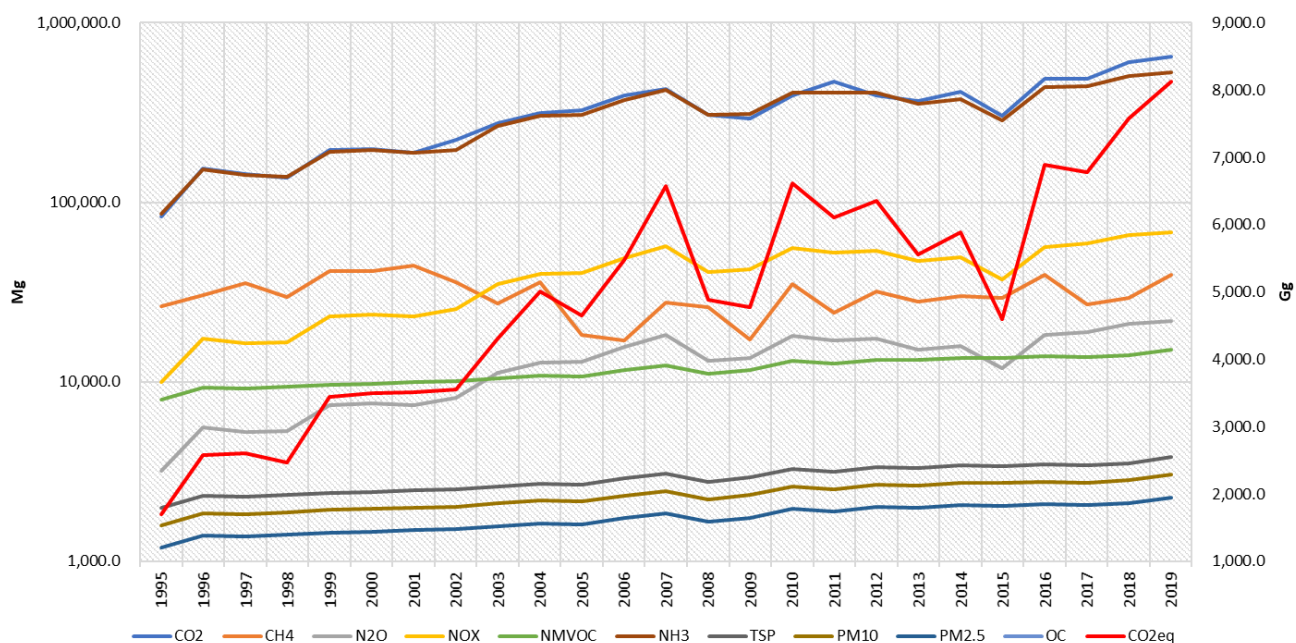

Figure S16. Annual emissions from agriculture production (AG: 4C + 3C3). All CO<sub>2eq</sub> values are in Gg.

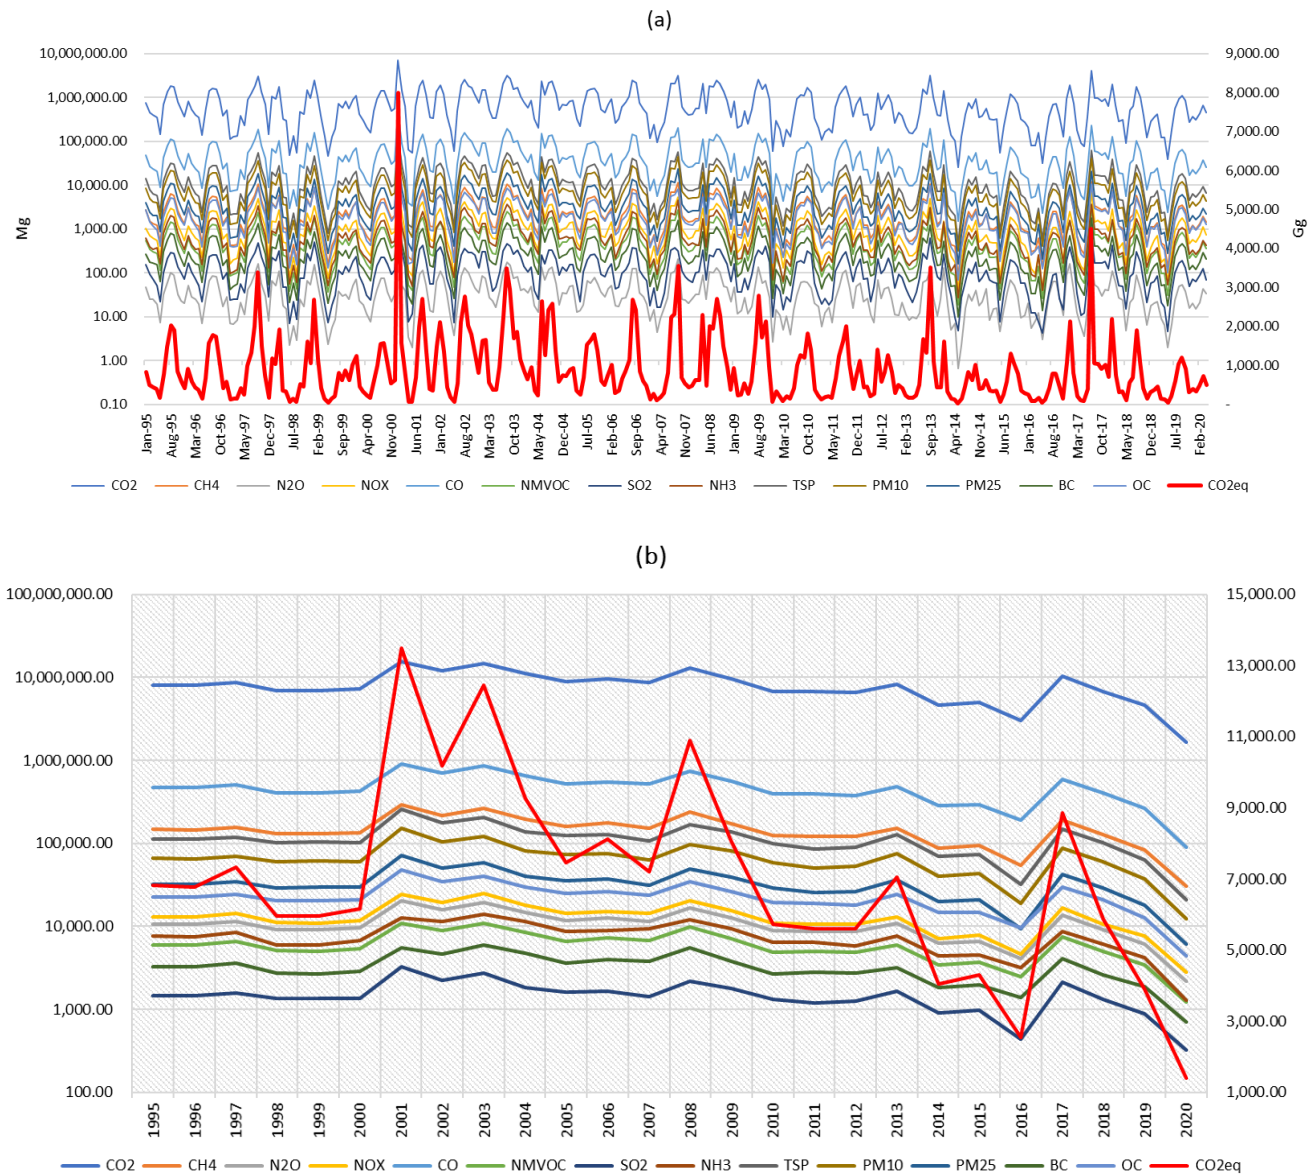

Figure S17. Monthly (a) and annual (b) emissions from biomass burning (OBB AWB: 4F). All CO<sub>2</sub>eq values are in Gg.

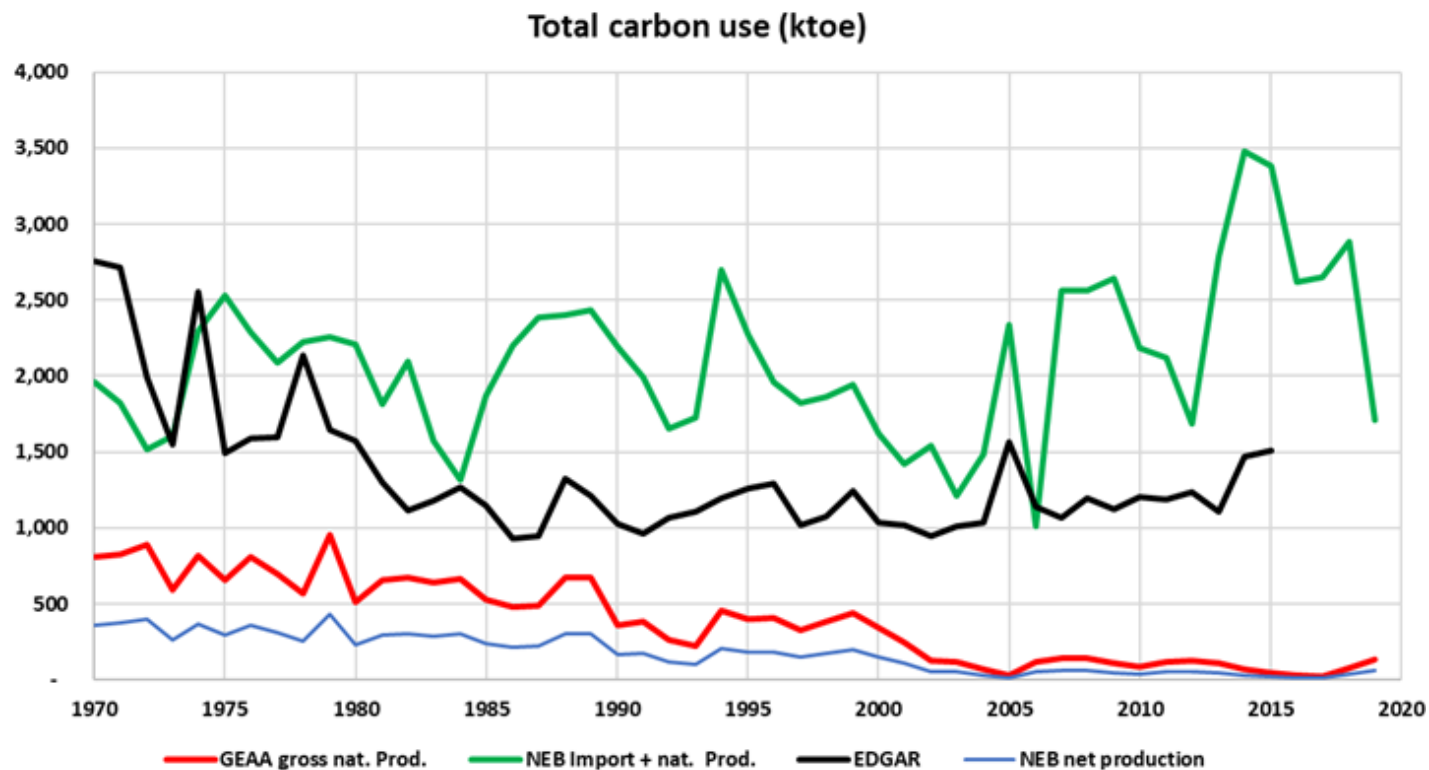

195

**Figure S18: Coal production and coal import in Argentina (ktce). Red line data used in GEAA (only national coal gross production), green line: National Energy Balance (NEB) data of import + national net production; blue line NEB net coal production; black line: estimation of EDGAR data.**
